# Supplementary material for: Discovery of highly functionalized 5,6-seco-grayanane diterpenoids as potent competitive PTP1B inhibitors
Source: Royal Society of Chemistry journal article supplement (doi:10.1039/c9qo01538h), 2020-01-01
Supplement: c9qo01538h1.pdf [file c9qo01538h1.pdf]

# Supplementary Information

## Discovery of highly functionalized 5,6-*seco*-grayanane diterpenoids as potent competitive PTP1B inhibitors

Junfei Zhou,<sup>‡,a</sup> Zhili Zuo,<sup>‡,b</sup> Junjun Liu,<sup>a</sup> Hanqi Zhang,<sup>a</sup> Guijuan Zheng<sup>a</sup> and Guangmin Yao<sup>\*,a,c</sup>

<sup>a</sup> Hubei Key Laboratory of Natural Medicinal Chemistry and Resource Evaluation, School of Pharmacy, Tongji Medical College, Huazhong University of Science and Technology, Wuhan 430030, China.

<sup>b</sup> State Key Laboratory of Phytochemistry and Plant Resources in West China, Kunming Institute of Botany, Chinese Academy of Science, Kunming 650204, China

<sup>c</sup> State Key Laboratory of Medicinal Chemical Biology, Nankai University, Tianjin 300071, China.

### Contents

|                                                                                                                                                                     |    |
|---------------------------------------------------------------------------------------------------------------------------------------------------------------------|----|
| <b>Table S1.</b> <sup>1</sup> H (400 MHz) and <sup>13</sup> C NMR (100 MHz) Spectroscopic Data for <b>1–3</b> and <b>9</b> in Methanol- <i>d</i> <sub>4</sub> ..... | 5  |
| <b>Figure S1.</b> <sup>1</sup> H NMR spectra (400 MHz) of <b>1</b> in methanol- <i>d</i> <sub>4</sub> with different delay time. ....                               | 6  |
| <b>Figure S2.</b> <sup>13</sup> C NMR spectra (100 MHz) of <b>1</b> in methanol- <i>d</i> <sub>4</sub> with different delay time. ....                              | 7  |
| <b>Figure S3.</b> <sup>1</sup> H NMR spectra (400 MHz) of <b>1</b> in different solvents. ....                                                                      | 7  |
| <b>Figure S4.</b> <sup>1</sup> H NMR experiments (600 MHz) of <b>1</b> in methanol- <i>d</i> <sub>4</sub> in different temperature. ....                            | 8  |
| <b>Figure S5.</b> Selected <sup>1</sup> H– <sup>1</sup> H COSY, HMBC, and NOESY correlations of <b>3</b> . ....                                                     | 8  |
| <b>Figure S6.</b> Experimental ECD spectra of <b>1–3</b> .....                                                                                                      | 8  |
| <b>Figure S7.</b> Concentration–inhibition ratio curves of oleanolic acid and compounds <b>1–3</b> and <b>9</b> . ....                                              | 11 |
| <b>Figure S8.</b> Lineweaver-Burk plot for the inhibition of PTP1B by mollactone A ( <b>1</b> ). ....                                                               | 11 |
| <b>Figure S9.</b> Lineweaver-Burk plot for the inhibition of PTP1B by mollactone B ( <b>2</b> ). ....                                                               | 12 |
| <b>Figure S10.</b> Lineweaver-Burk plot for the inhibition of PTP1B by mollactone C ( <b>3</b> ). ....                                                              | 12 |
| <b>Figure S11.</b> Dixon plot for the inhibition of the PTP1B by mollactone A ( <b>1</b> ). ....                                                                    | 13 |
| <b>Figure S12.</b> Dixon plot for the inhibition of the PTP1B by mollactone B ( <b>2</b> ). ....                                                                    | 13 |
| <b>Figure S13.</b> Dixon plot for the inhibition of the PTP1B by mollactone C ( <b>3</b> ). ....                                                                    | 14 |
| <b>Figure S14.</b> Molecular docking models for PTP1B inhibition of mollactone A ( <b>1</b> ). ....                                                                 | 14 |
| <b>Figure S15.</b> Molecular docking models for PTP1B inhibition of mollactone B ( <b>2</b> ). ....                                                                 | 15 |
| <b>Figure S16.</b> Molecular docking models for PTP1B inhibition of mollactone C ( <b>3</b> ). ....                                                                 | 15 |
| <b>Figure S17.</b> Molecular docking models for PTP1B inhibition of mollactone B 3- <i>O</i> -sulfate ( <b>9</b> ). ....                                            | 16 |

\* To whom correspondence should be addressed. E-mail: gyap@mail.hust.edu.cn

‡ These authors contributed equally.

|                                                                                                                                                                                                          |    |
|----------------------------------------------------------------------------------------------------------------------------------------------------------------------------------------------------------|----|
| <b>Figure S18.</b> Lineweaver-Burk plot for the inhibition of PTP1B by mollactone B 3- <i>O</i> -sulfate ( <b>9</b> ). .....                                                                             | 16 |
| <b>Figure S19.</b> Dixon plot for the inhibition of the PTP1B by mollactone B 3- <i>O</i> -sulfate ( <b>9</b> ). .....                                                                                   | 17 |
| <b>Table S2.</b> Effect of different concentrations of mollactone A ( <b>1</b> ) on $V_{\max}$ , $K_m$ , and the $K_{ik}$ to $K_{iv}$ ratio using <i>p</i> NPP as a substrate. ....                      | 18 |
| <b>Table S3.</b> Effect of different concentrations of mollactone B ( <b>2</b> ) on $V_{\max}$ , $K_m$ , and the $K_{ik}$ to $K_{iv}$ ratio using <i>p</i> NPP as a substrate. ....                      | 18 |
| <b>Table S4.</b> Effect of different concentrations of mollactone C ( <b>3</b> ) on $V_{\max}$ , $K_m$ , and the $K_{ik}$ to $K_{iv}$ ratio using <i>p</i> NPP as a substrate. ....                      | 18 |
| <b>Table S5.</b> Effect of different concentrations of mollactone B 3- <i>O</i> -sulfate ( <b>9</b> ) on $V_{\max}$ , $K_m$ , and the $K_{ik}$ to $K_{iv}$ ratio using <i>p</i> NPP as a substrate. .... | 19 |
| <b>Figure S20.</b> The docked conformation of mollactones A–C ( <b>1–3</b> ) and mollactone B 3- <i>O</i> -sulfate ( <b>9</b> ) in the binding pocket of PTP1B. ....                                     | 19 |
| <b>Figure S21.</b> The UV spectrum of <b>1</b> in methanol. ....                                                                                                                                         | 20 |
| <b>Figure S22.</b> The IR spectrum of <b>1</b> . ....                                                                                                                                                    | 20 |
| <b>Figure S23.</b> HR-ESI-MS spectrum of <b>1</b> . ....                                                                                                                                                 | 21 |
| <b>Figure S24.</b> $^1\text{H}$ NMR spectrum of <b>1</b> (400 MHz, methanol- $d_4$ ) ....                                                                                                                | 21 |
| <b>Figure S25.</b> $^1\text{H}$ NMR spectrum of <b>1</b> (400 MHz, methanol- $d_4$ , amplified) ....                                                                                                     | 22 |
| <b>Figure S26.</b> $^{13}\text{C}$ NMR spectrum of <b>1</b> (100 MHz, methanol- $d_4$ ) ....                                                                                                             | 22 |
| <b>Figure S27.</b> DEPT spectrum of <b>1</b> (100 MHz, methanol- $d_4$ ). ....                                                                                                                           | 23 |
| <b>Figure S28.</b> HSQC spectrum of <b>1</b> ( $^1\text{H}$ : 400 MHz, $^{13}\text{C}$ : 100 MHz, methanol- $d_4$ ) ....                                                                                 | 23 |
| <b>Figure S29.</b> HMBC spectrum of <b>1</b> ( $^1\text{H}$ : 400 MHz, $^{13}\text{C}$ : 100 MHz, methanol- $d_4$ ) ....                                                                                 | 24 |
| <b>Figure S30.</b> $^1\text{H}$ – $^1\text{H}$ COSY spectrum of <b>1</b> (400 MHz, methanol- $d_4$ ) ....                                                                                                | 24 |
| <b>Figure S31.</b> NOESY spectrum of <b>1</b> (400 MHz, methanol- $d_4$ ) ....                                                                                                                           | 25 |
| <b>Figure S32.</b> $^1\text{H}$ NMR spectrum of <b>1</b> (400 MHz, pyridine- $d_5$ ) ....                                                                                                                | 25 |
| <b>Figure S33.</b> $^1\text{H}$ NMR spectrum of <b>1</b> (400 MHz, pyridine- $d_5$ , amplified) ....                                                                                                     | 26 |
| <b>Figure S34.</b> $^{13}\text{C}$ NMR spectrum of <b>1</b> (100 MHz, pyridine- $d_5$ ) ....                                                                                                             | 26 |
| <b>Figure S35.</b> DEPT spectrum of <b>1</b> (100 MHz, pyridine- $d_5$ ) ....                                                                                                                            | 27 |
| <b>Figure S36.</b> HSQC spectrum of <b>1</b> ( $^1\text{H}$ : 400 MHz, $^{13}\text{C}$ : 100 MHz, pyridine- $d_5$ ) ....                                                                                 | 27 |
| <b>Figure S37.</b> HMBC spectrum of <b>1</b> ( $^1\text{H}$ : 400 MHz, $^{13}\text{C}$ : 100 MHz, pyridine- $d_5$ ) ....                                                                                 | 28 |
| <b>Figure S38.</b> $^1\text{H}$ – $^1\text{H}$ COSY spectrum of <b>1</b> (100 MHz, pyridine- $d_5$ ) ....                                                                                                | 28 |
| <b>Figure S39.</b> NOESY spectrum of <b>1</b> (100 MHz, pyridine- $d_5$ ) ....                                                                                                                           | 29 |
| <b>Figure S40.</b> $^1\text{H}$ NMR spectrum of <b>1</b> (400 MHz, DMSO- $d_6$ ) ....                                                                                                                    | 29 |
| <b>Figure S41.</b> $^1\text{H}$ NMR spectrum of <b>1</b> (400 MHz, DMSO- $d_6$ , amplified) ....                                                                                                         | 30 |

|                                                                                                                             |    |
|-----------------------------------------------------------------------------------------------------------------------------|----|
| <b>Figure S42.</b> $^{13}\text{C}$ NMR spectrum of <b>1</b> (100 MHz, $\text{DMSO-}d_6$ ).....                              | 30 |
| <b>Figure S43.</b> DEPT spectrum of <b>1</b> (100 MHz, $\text{DMSO-}d_6$ ).....                                             | 31 |
| <b>Figure S44.</b> HSQC spectrum of <b>1</b> ( $^1\text{H}$ : 400 MHz, $^{13}\text{C}$ : 100 MHz, $\text{DMSO-}d_6$ ).....  | 31 |
| <b>Figure S45.</b> HMBC spectrum of <b>1</b> ( $^1\text{H}$ : 400 MHz, $^{13}\text{C}$ : 100 MHz, $\text{DMSO-}d_6$ ) ..... | 32 |
| <b>Figure S46.</b> $^1\text{H}$ – $^1\text{H}$ COSY spectrum of <b>1</b> (100 MHz, $\text{DMSO-}d_6$ ).....                 | 32 |
| <b>Figure S47.</b> NOESY spectrum of <b>1</b> (100 MHz, $\text{DMSO-}d_6$ ).....                                            | 33 |
| <b>Figure S48.</b> The UV spectrum of <b>2</b> .....                                                                        | 33 |
| <b>Figure S49.</b> The IR spectrum of <b>2</b> .....                                                                        | 34 |
| <b>Figure S50.</b> The HRESIMS spectrum of <b>2</b> .....                                                                   | 34 |
| <b>Figure S51.</b> $^1\text{H}$ NMR spectrum of <b>2</b> (400 MHz, methanol- $d_4$ ) .....                                  | 35 |
| <b>Figure S52.</b> $^1\text{H}$ NMR spectrum of <b>2</b> (400 MHz, methanol- $d_4$ , amplified) .....                       | 35 |
| <b>Figure S53.</b> $^{13}\text{C}$ NMR spectrum of <b>2</b> (100 MHz, methanol- $d_4$ ) .....                               | 36 |
| <b>Figure S54.</b> DEPT spectrum of <b>2</b> (100 MHz, methanol- $d_4$ ).....                                               | 36 |
| <b>Figure S55.</b> HSQC spectrum of <b>2</b> ( $^1\text{H}$ : 400 MHz, $^{13}\text{C}$ : 100 MHz, methanol- $d_4$ ) .....   | 37 |
| <b>Figure S56.</b> HMBC spectrum of <b>2</b> ( $^1\text{H}$ : 400 MHz, $^{13}\text{C}$ : 100 MHz, methanol- $d_4$ ) .....   | 37 |
| <b>Figure S57.</b> $^1\text{H}$ – $^1\text{H}$ COSY spectrum of <b>2</b> (100 MHz, methanol- $d_4$ ) .....                  | 38 |
| <b>Figure S58.</b> NOESY spectrum of <b>2</b> (100 MHz, methanol- $d_4$ ) .....                                             | 38 |
| <b>Figure S59.</b> The UV spectrum of <b>3</b> .....                                                                        | 39 |
| <b>Figure S60.</b> The IR spectrum of <b>3</b> .....                                                                        | 39 |
| <b>Figure S61.</b> The HRESIMS spectrum of <b>3</b> .....                                                                   | 40 |
| <b>Figure S62.</b> $^1\text{H}$ NMR spectrum of <b>3</b> (400 MHz, methanol- $d_4$ ) .....                                  | 40 |
| <b>Figure S63.</b> $^1\text{H}$ NMR spectrum of <b>3</b> (400 MHz, methanol- $d_4$ , amplified) .....                       | 41 |
| <b>Figure S64.</b> $^{13}\text{C}$ NMR spectrum of <b>3</b> (100 MHz, methanol- $d_4$ ) .....                               | 41 |
| <b>Figure S65.</b> DEPT spectrum of <b>3</b> (100 MHz, methanol- $d_4$ ).....                                               | 42 |
| <b>Figure S66.</b> HSQC spectrum of <b>3</b> ( $^1\text{H}$ : 400 MHz, $^{13}\text{C}$ : 100 MHz, methanol- $d_4$ ) .....   | 42 |
| <b>Figure S67.</b> HMBC spectrum of <b>3</b> ( $^1\text{H}$ : 400 MHz, $^{13}\text{C}$ : 100 MHz, methanol- $d_4$ ) .....   | 43 |
| <b>Figure S68.</b> $^1\text{H}$ – $^1\text{H}$ COSY spectrum of <b>3</b> (400 MHz, methanol- $d_4$ ) .....                  | 43 |
| <b>Figure S69.</b> NOESY spectrum of <b>3</b> (400 MHz, methanol- $d_4$ ) .....                                             | 44 |
| <b>Figure S70.</b> The HRESIMS spectrum of <b>4</b> .....                                                                   | 44 |
| <b>Figure S71.</b> $^1\text{H}$ NMR spectrum of <b>4</b> (400 MHz, methanol- $d_4$ ) .....                                  | 45 |
| <b>Figure S72.</b> $^1\text{H}$ NMR spectrum of <b>4</b> (400 MHz, methanol- $d_4$ , amplified) .....                       | 45 |
| <b>Figure S73.</b> $^{13}\text{C}$ NMR spectrum of <b>4</b> (100 MHz, methanol- $d_4$ ) .....                               | 46 |

|                                                                                                                                           |    |
|-------------------------------------------------------------------------------------------------------------------------------------------|----|
| <b>Figure S74.</b> DEPT spectrum of <b>4</b> (100 MHz, methanol- <i>d</i> <sub>4</sub> ).....                                             | 46 |
| <b>Figure S75.</b> The HRESIMS spectrum of <b>9</b> .....                                                                                 | 47 |
| <b>Figure S76.</b> <sup>1</sup> H NMR spectrum of <b>9</b> (400 MHz, methanol- <i>d</i> <sub>4</sub> ) .....                              | 47 |
| <b>Figure S77.</b> <sup>13</sup> C NMR spectrum of <b>9</b> (100 MHz, methanol- <i>d</i> <sub>4</sub> ) .....                             | 48 |
| <b>Figure S78.</b> DEPT spectrum of <b>9</b> (100 MHz, methanol- <i>d</i> <sub>4</sub> ).....                                             | 48 |
| <b>Figure S79.</b> HSQC spectrum of <b>9</b> ( <sup>1</sup> H: 400 MHz, <sup>13</sup> C: 100 MHz, methanol- <i>d</i> <sub>4</sub> ) ..... | 49 |
| <b>Figure S81.</b> HMBC spectrum of <b>9</b> ( <sup>1</sup> H: 400 MHz, <sup>13</sup> C: 100 MHz, methanol- <i>d</i> <sub>4</sub> ) ..... | 49 |
| <b>Figure S81.</b> <sup>1</sup> H- <sup>1</sup> H COSY spectrum of <b>9</b> (400 MHz, methanol- <i>d</i> <sub>4</sub> ) .....             | 50 |
| <b>Figure S82.</b> NOESY spectrum of <b>9</b> (400 MHz, methanol- <i>d</i> <sub>4</sub> ) .....                                           | 50 |

**Table S1.** <sup>1</sup>H (400 MHz) and <sup>13</sup>C NMR (100 MHz) Spectroscopic Data for **1–3** and **9** in Methanol-*d*<sub>4</sub>.

| no.         | <b>1</b>                              |                     | <b>2</b>                              |                     | <b>3</b>                              |                     | <b>9</b>                              |                     |
|-------------|---------------------------------------|---------------------|---------------------------------------|---------------------|---------------------------------------|---------------------|---------------------------------------|---------------------|
|             | $\delta_{\text{H}}$ ( <i>J</i> in Hz) | $\delta_{\text{C}}$ |
| 1           |                                       | 148.4               |                                       | 143.2               |                                       | 143.4               |                                       | 143.9               |
| 2           | 7.13, brs                             | 159.3 <sup>a</sup>  | 7.31, d (2.5)                         | 157.0               | 7.33, d (2.5)                         | 157.1               | 7.46, d (2.6)                         | 154.0               |
| 3 $\alpha$  | 4.47, brs                             | 78.8                | 4.43, d (2.5)                         | 77.8                | 4.43, d (2.5)                         | 77.8                | 5.07, d (2.6)                         | 83.1                |
| 4           |                                       | 49.7 <sup>b</sup>   |                                       | 51.1                |                                       | 51.1                |                                       | 50.28               |
| 5           |                                       | 213.3 <sup>b</sup>  |                                       | 211.7               |                                       | 211.7               |                                       | 210.3               |
| 6           |                                       | 177.8               |                                       | 178.6               |                                       | 178.0               |                                       | 178.5               |
| 7 $\alpha$  |                                       | <sup>c</sup>        | 2.24, d (16.6)                        | 37.9                | 2.26, d (16.5)                        | 40.9                | 2.19, d (16.5)                        | 37.9                |
| 7 $\beta$   |                                       |                     | 2.32, dd (16.6, 0.8)                  |                     | 2.33, d (16.5)                        |                     | 2.35, d (16.5)                        |                     |
| 8           |                                       | 56.8                |                                       | 58.1                |                                       | 53.9                |                                       | 58.0                |
| 9 $\beta$   |                                       | 140.4 <sup>b</sup>  | 3.04, d (8.0)                         | 40.0                | 3.12, d (7.8)                         | 46.7                | 3.04, d (7.9)                         | 40.0                |
| 10          |                                       | 120.0 <sup>b</sup>  |                                       | 143.3               |                                       | 143.1               |                                       | 142.8               |
| 11 $\alpha$ | 2.17, overlap                         | 24.4                | 1.76, m                               | 25.8                | 1.73, m                               | 24.6                | 1.77, m                               | 25.7                |
| 11 $\beta$  | 2.66, dd (15.9, 7.7)                  |                     | 2.02, m                               |                     | 2.01, m                               |                     | 2.03, m                               |                     |
| 12 $\alpha$ | 1.92, ddd (15.9, 7.7, 3.3)            | 25.7                | 1.86, m                               | 25.2                | 1.86, overlap                         | 27.3                | 1.86, overlap                         | 25.2                |
| 12 $\beta$  | 1.67, m                               |                     | 1.86, m                               |                     | 1.92, overlap                         |                     | 1.86, overlap                         |                     |
| 13 $\alpha$ | 2.44, m                               | 51.5                | 2.82, t (2.7)                         | 50.3                | 2.44, t (2.7)                         | 52.6                | 2.81, m                               | 50.27               |
| 14 $\alpha$ | 4.29, s                               | 95.9                | 4.63, s                               | 91.3                | 4.62, s                               | 91.3                | 4.61, s                               | 91.2                |
| 15 $\alpha$ | 2.24, overlap                         | 55.1                | 5.30, q (1.6)                         | 128.1               | 2.21, d (15.2)                        | 55.1                | 5.31, s                               | 128.1               |
| 15 $\beta$  | 1.87, overlap                         |                     |                                       |                     | 1.91, d (15.2)                        |                     |                                       |                     |
| 16          |                                       | 81.7                |                                       | 142.5               |                                       | 80.9                |                                       | 142.4               |
| 17          | 1.43, s                               | 25.8                | 1.80, d (1.6)                         | 15.3                | 1.42, s                               | 25.1                | 1.80, d (1.5)                         | 15.3                |
| 18          | 1.04, brs                             | 20.6 <sup>a</sup>   | 1.01, s                               | 21.1                | 1.01, s                               | 21.1                | 1.10, s                               | 21.4                |
| 19          | 1.14, brs                             | 23.7 <sup>a</sup>   | 1.12, s                               | 23.4                | 1.12, s                               | 23.4                | 1.21, s                               | 23.5                |
| 20          | 1.70, brs                             | 19.9 <sup>a</sup>   | 6.18, 5.57, s                         | 120.5               | 6.20, 5.50, s                         | 120.7               | 6.26, 5.61, s                         | 121.2               |

<sup>a</sup> NMR data were assigned by HSQC spectrum (Figure S27). <sup>b</sup> NMR data were assigned by HMBC spectrum (Figure S28). <sup>c</sup> NMR data couldn't be assigned by any spectra.

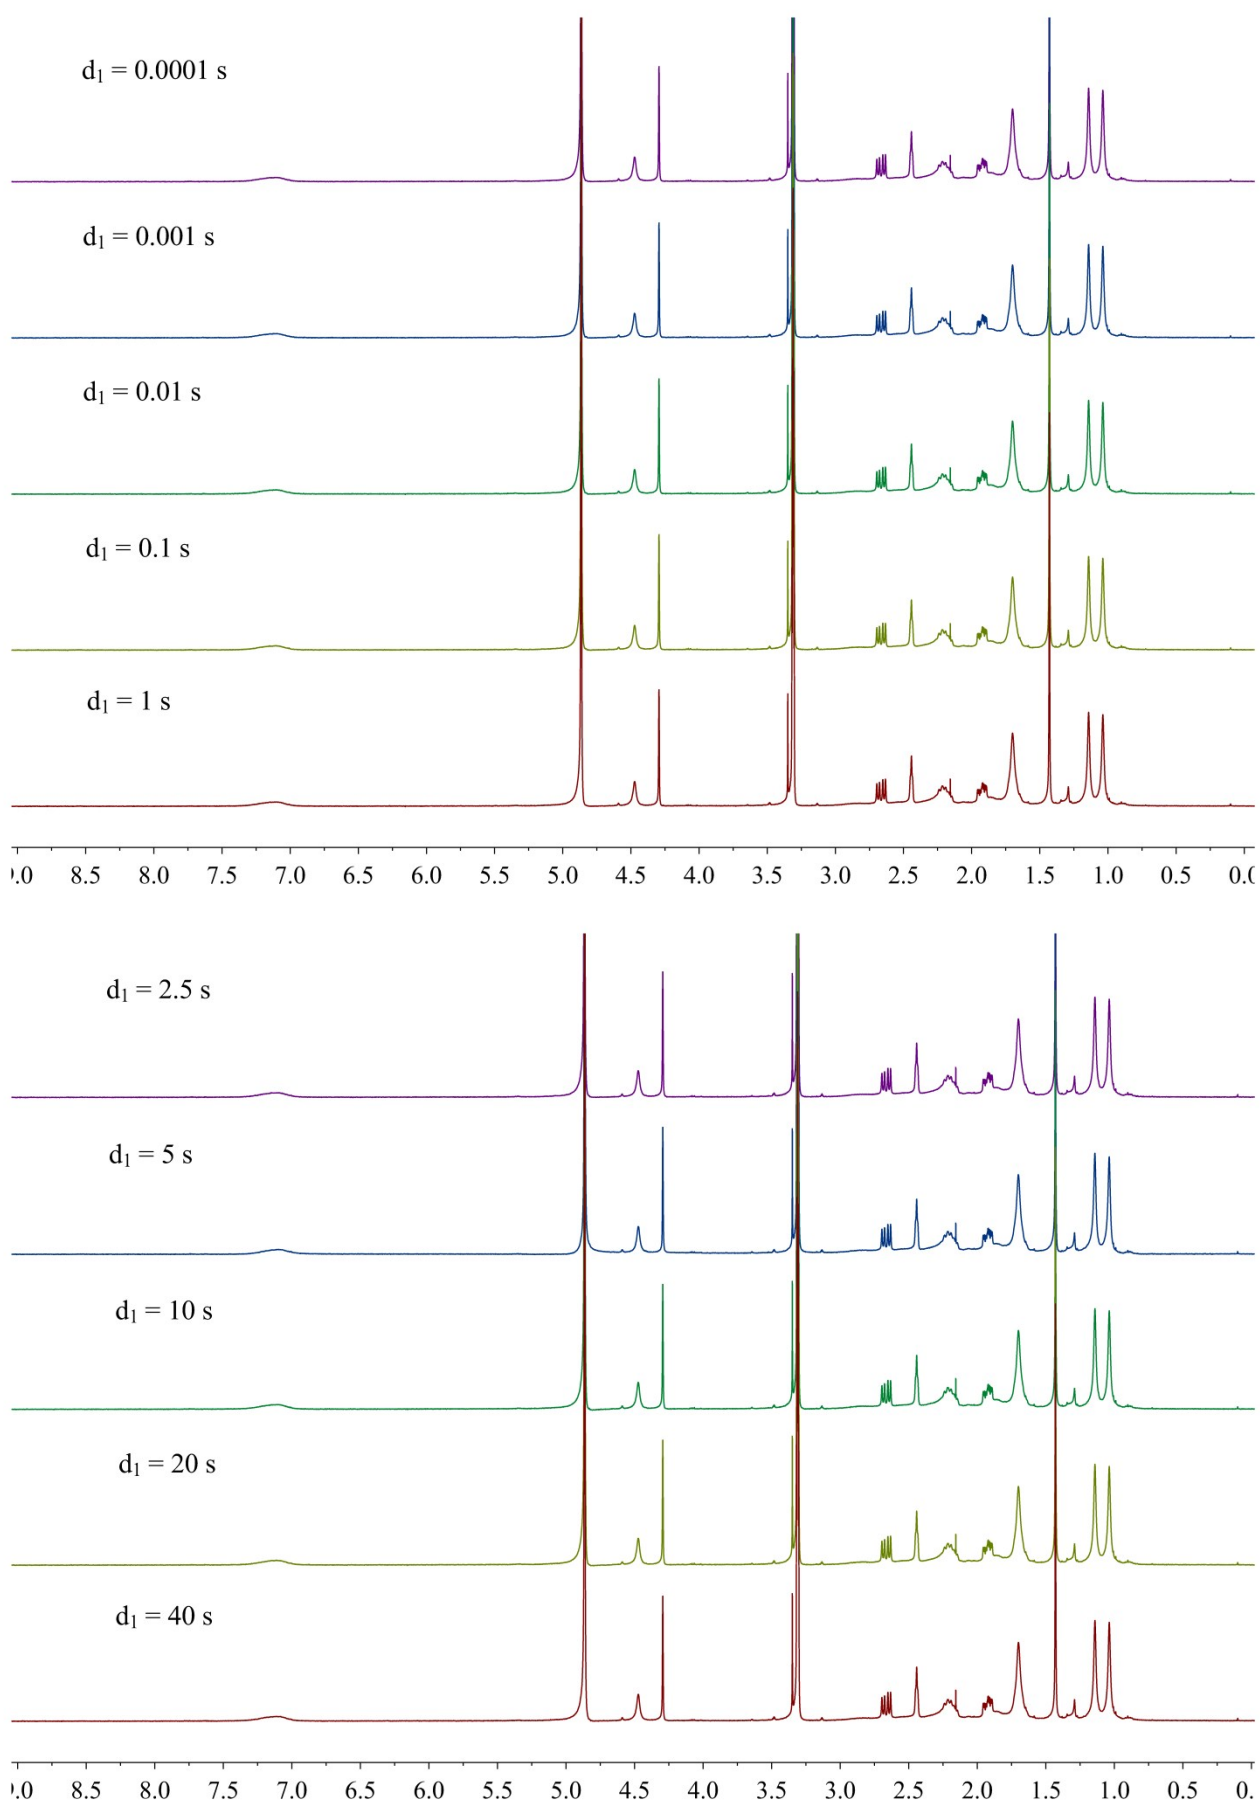

**Figure S1.**  $^1\text{H}$  NMR spectra (400 MHz) of **1** in methanol- $d_4$  with different delay time.

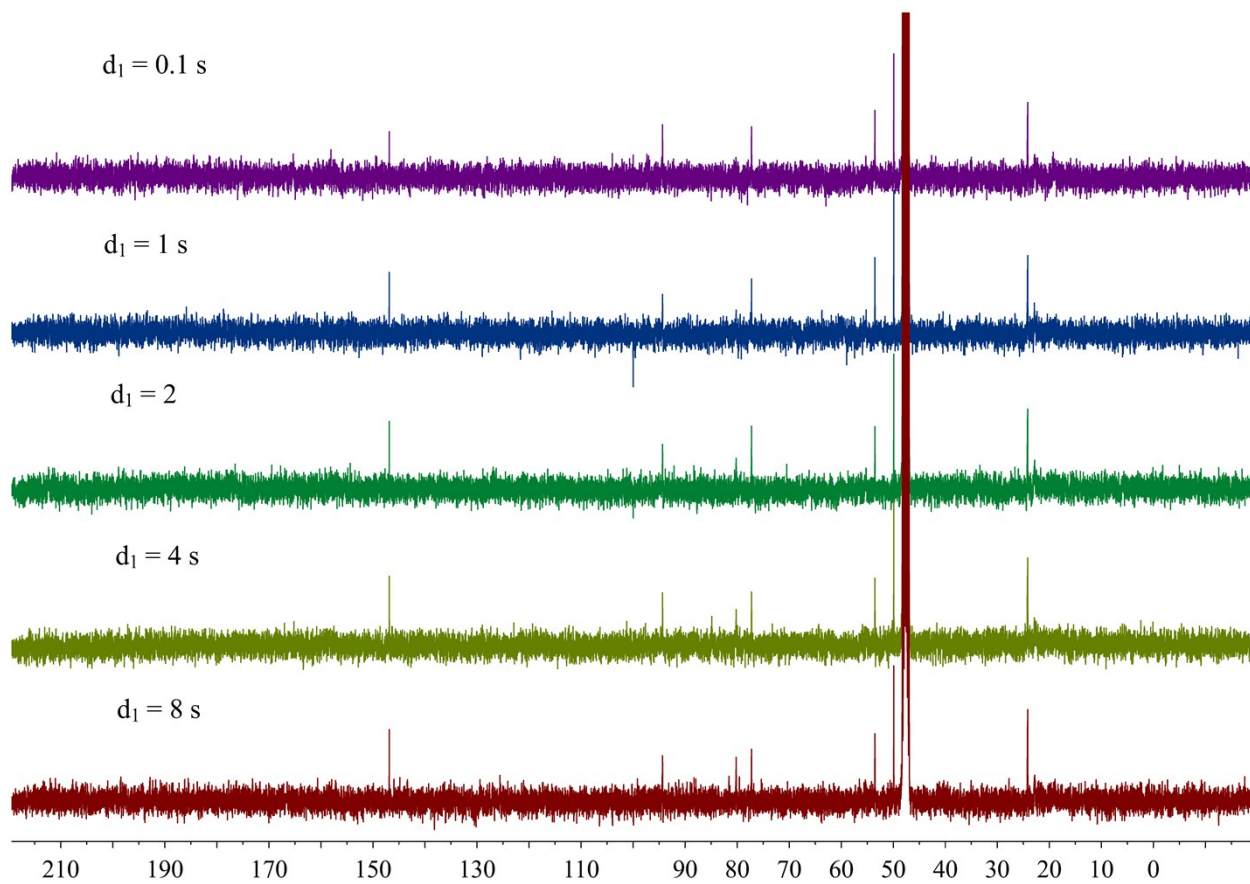

**Figure S2.**  $^{13}\text{C}$  NMR spectra (100 MHz) of **1** in methanol- $d_4$  with different delay time.

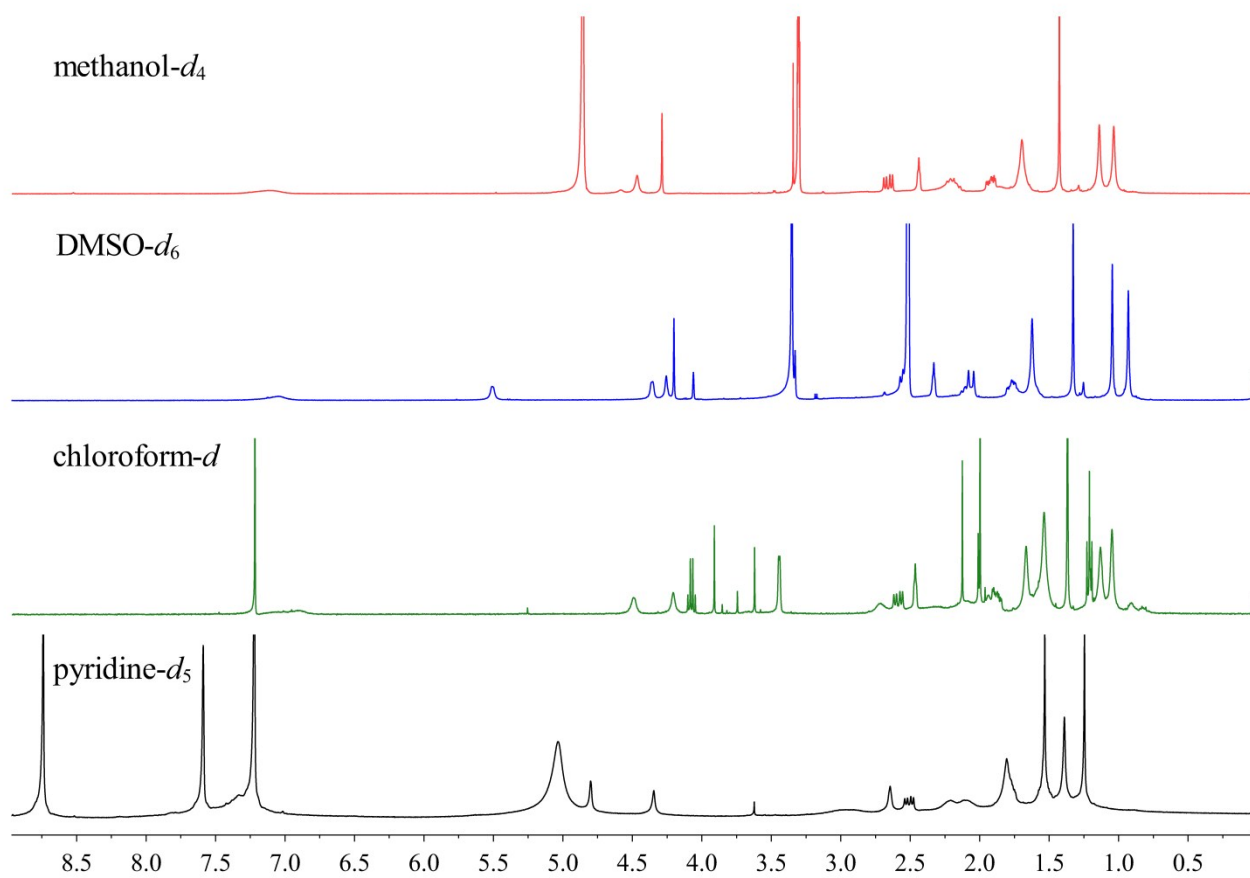

**Figure S3.**  $^1\text{H}$  NMR spectra (400 MHz) of **1** in different solvents.

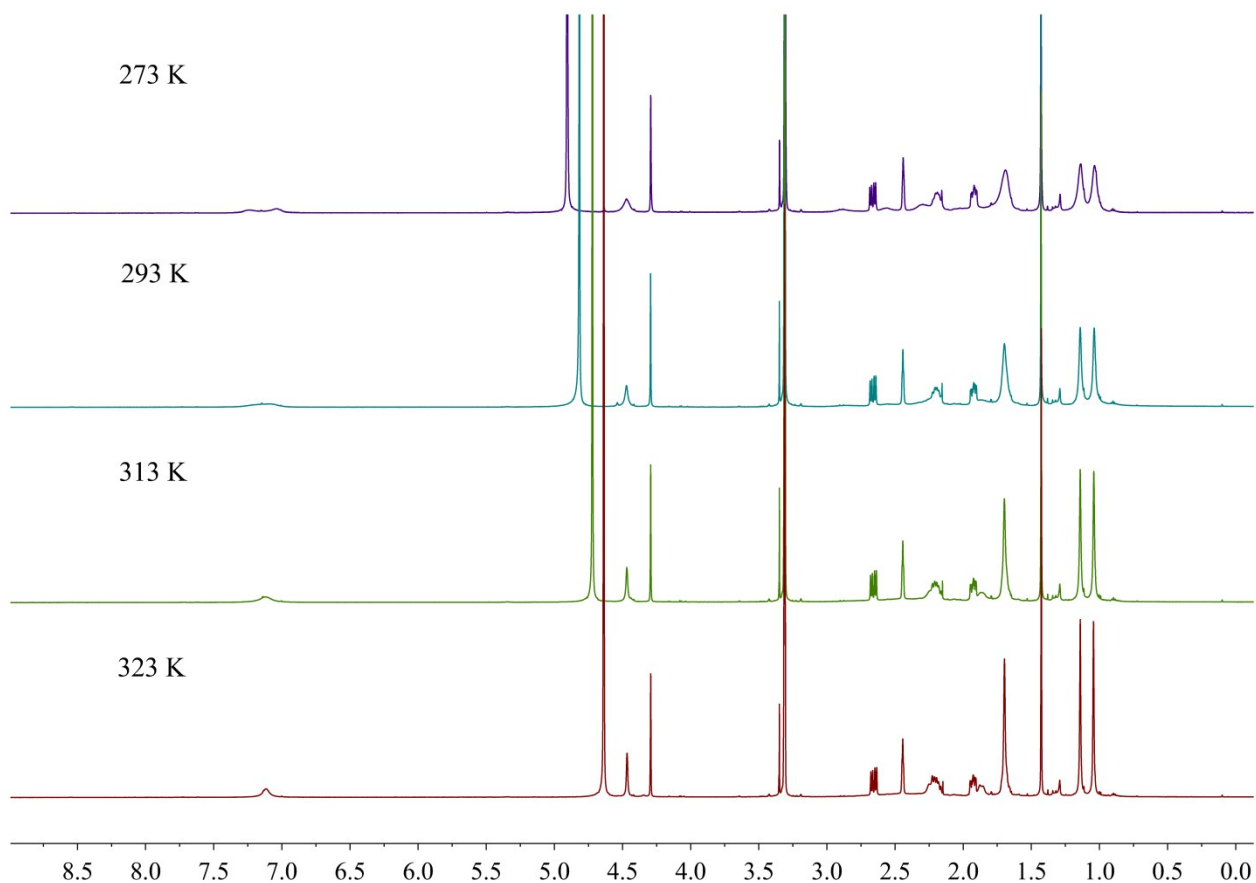

**Figure S4.**  $^1\text{H}$  NMR experiments (600 MHz) of **1** in methanol- $d_4$  in different temperature.

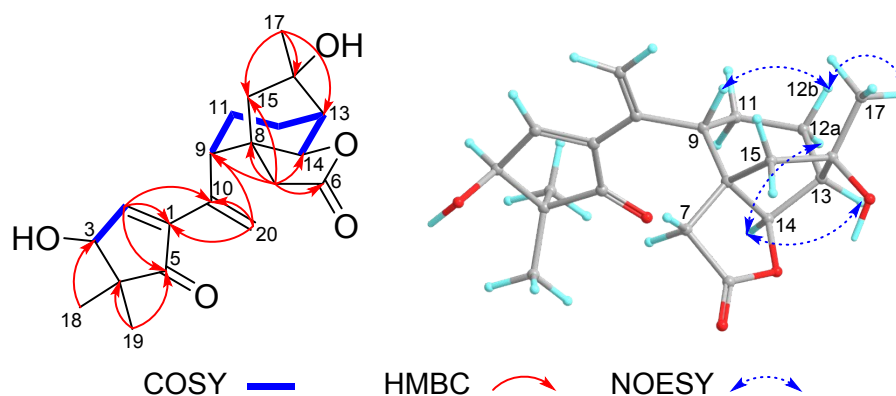

**Figure S5.** Selected  $^1\text{H}$ - $^1\text{H}$  COSY, HMBC, and NOESY correlations of **3**.

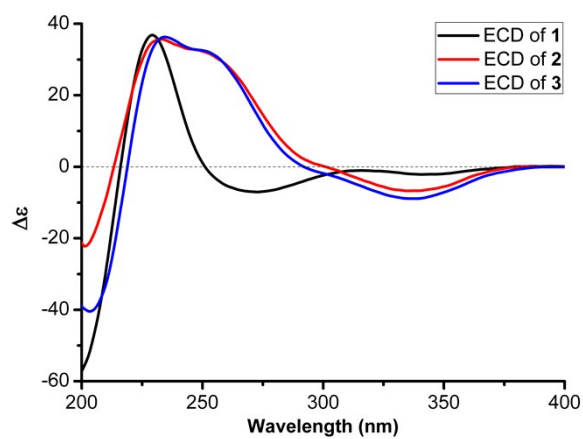



**Figure S6.** Experimental ECD spectra of 1–3.

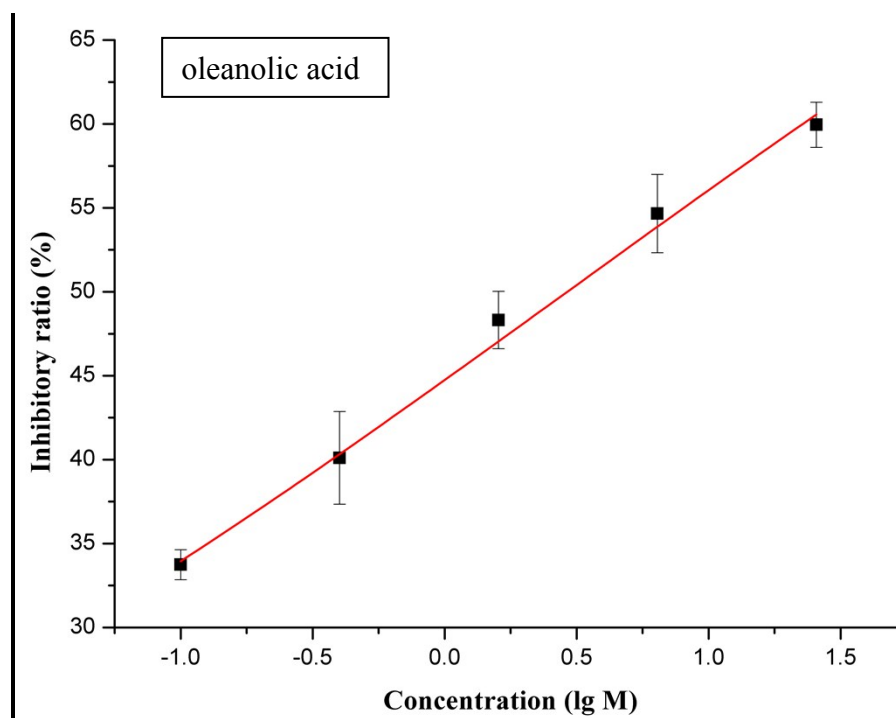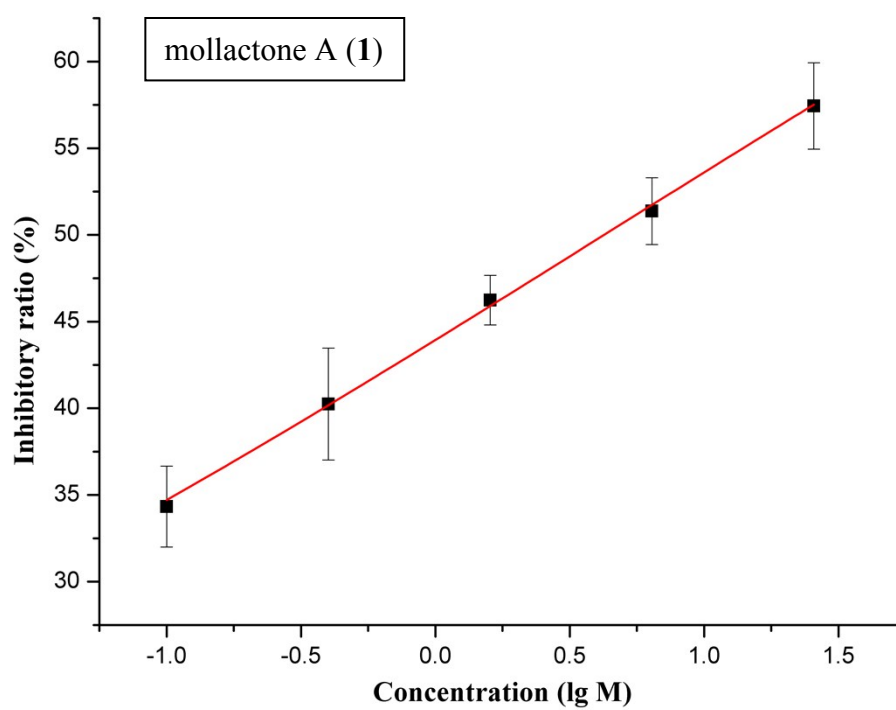

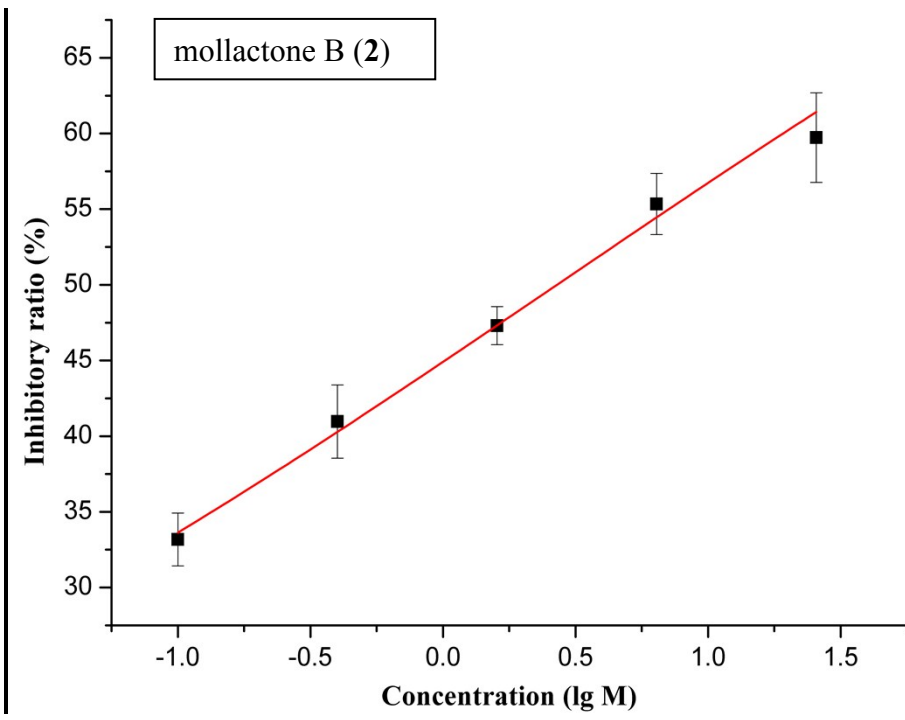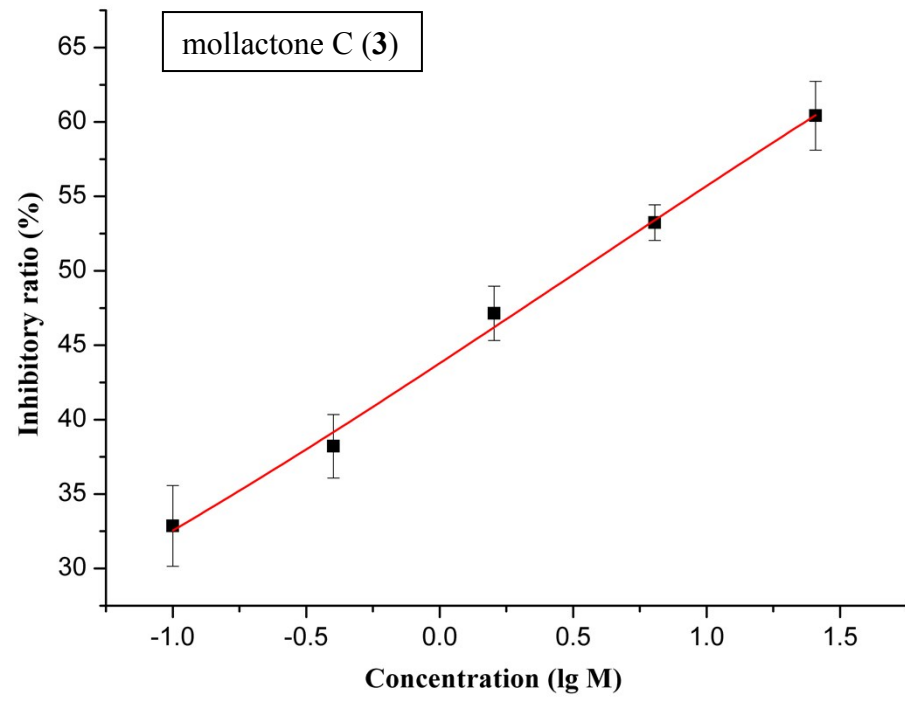

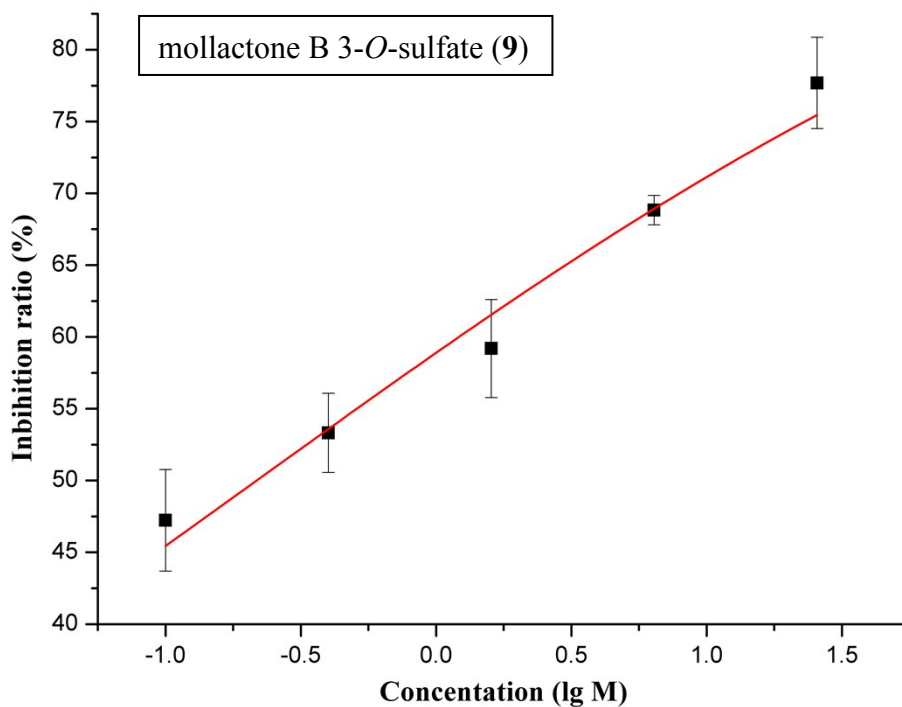

**Figure S7.** Concentration–inhibition ratio curves of oleanolic acid and compounds **1–3** and **9**.

The final concentration of oleanolic acid and compounds **1–3** and **9** were determined as 0.1, 0.4, 1.6, 6.4, and 25.6  $\mu\text{M}$ .

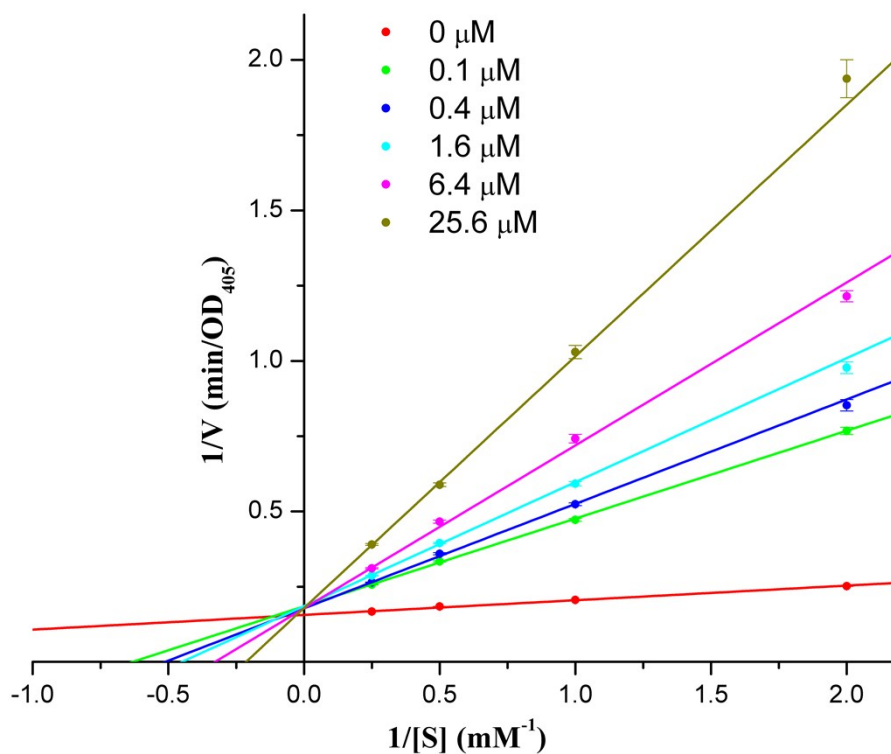

**Figure S8.** Lineweaver-Burk plot for the inhibition of PTP1B by mollactone A (**1**).

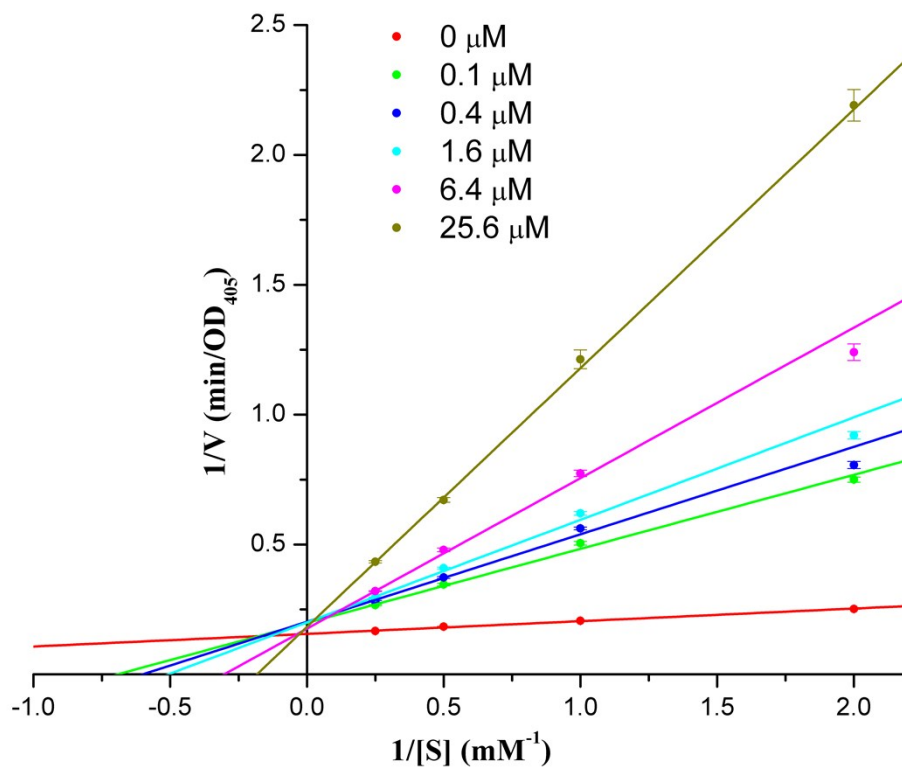

**Figure S9.** Lineweaver-Burk plot for the inhibition of PTP1B by mollactone B (2).

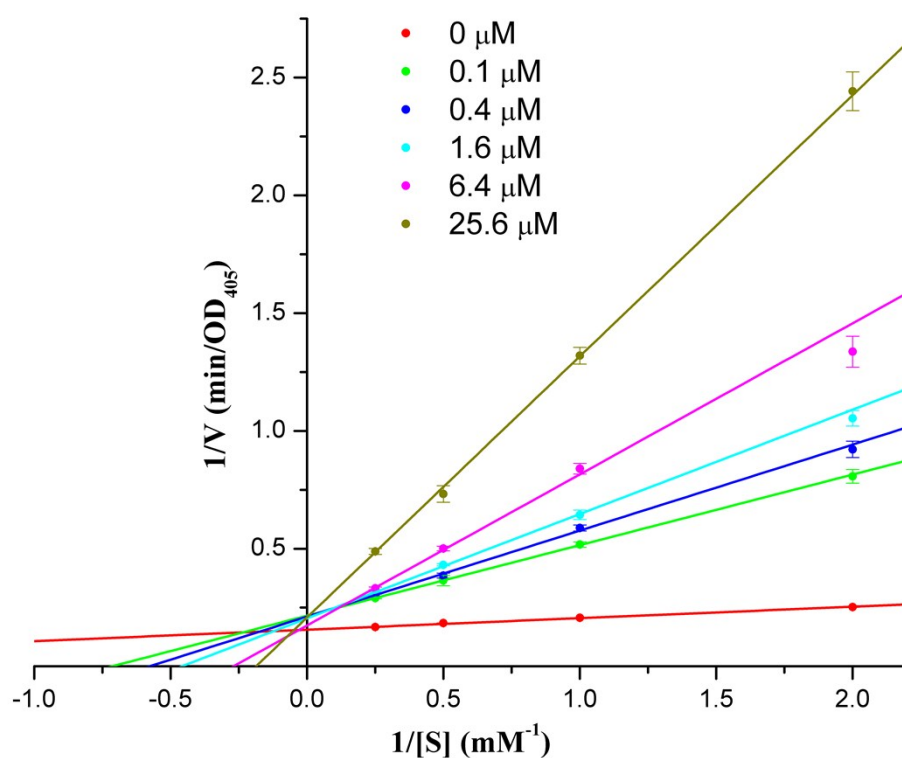

**Figure S10.** Lineweaver-Burk plot for the inhibition of PTP1B by mollactone C (3).

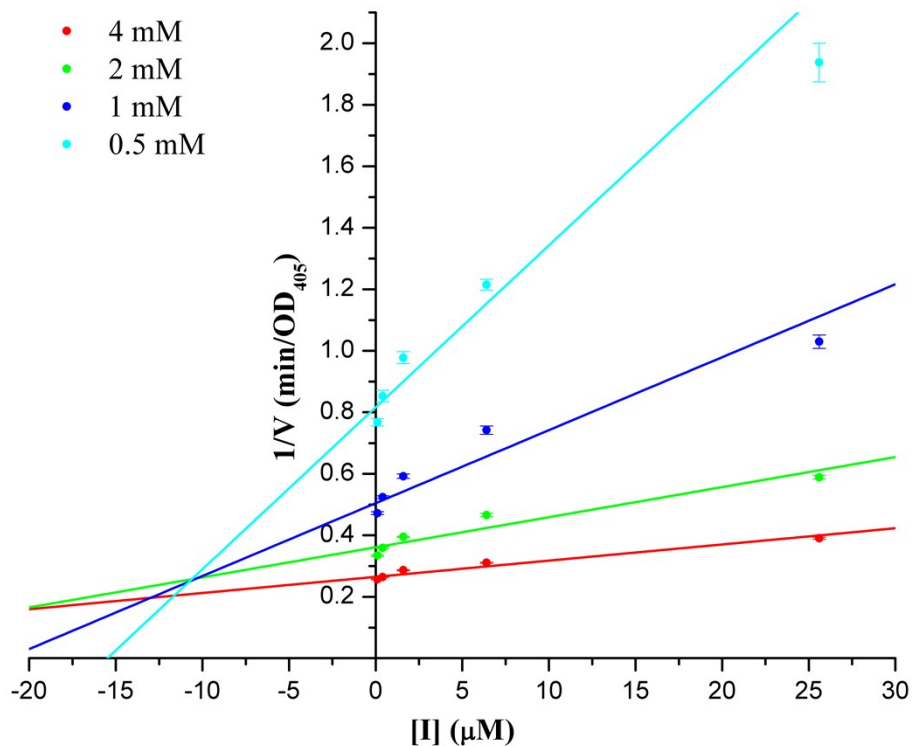

**Figure S11.** Dixon plot for the inhibition of the PTP1B by mollactone A (1).

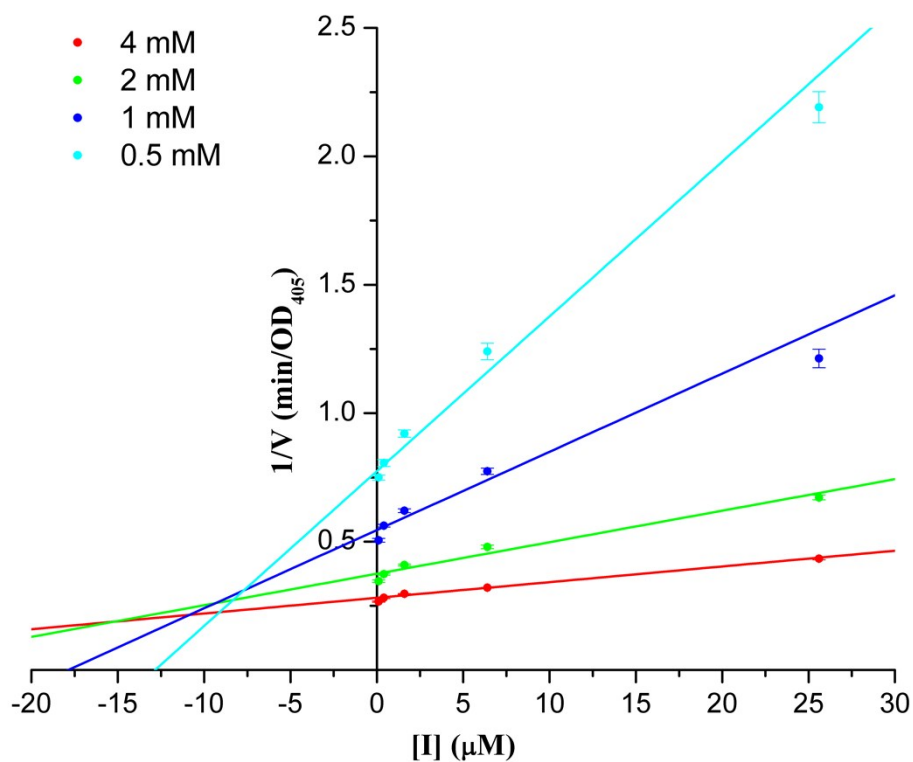

**Figure S12.** Dixon plot for the inhibition of the PTP1B by mollactone B (2).

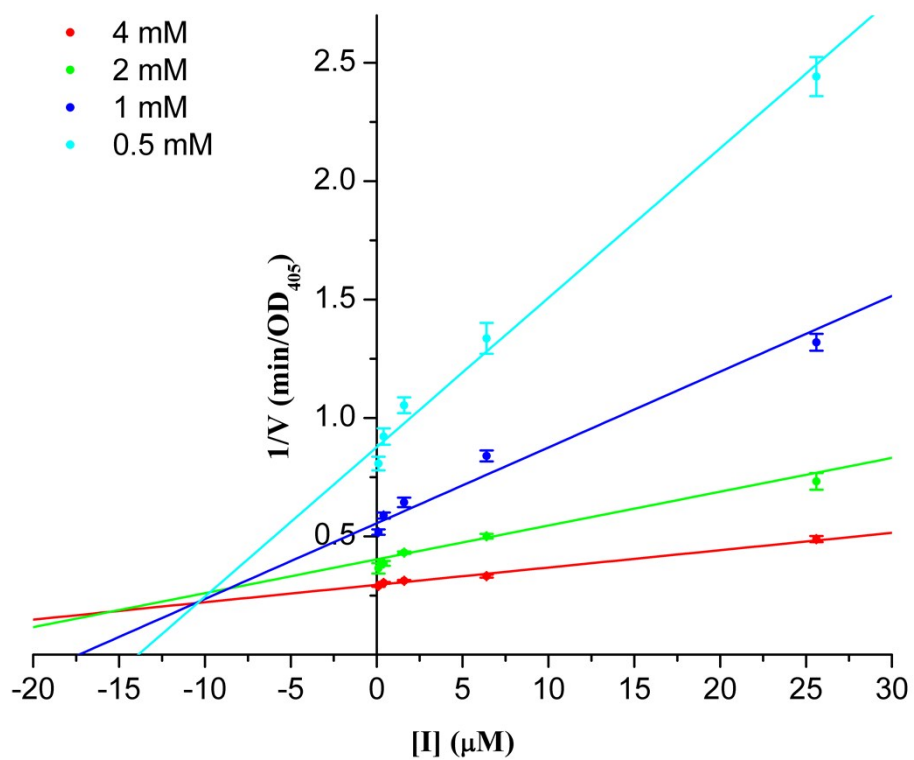

**Figure S13.** Dixon plot for the inhibition of the PTP1B by mollactone C (3).

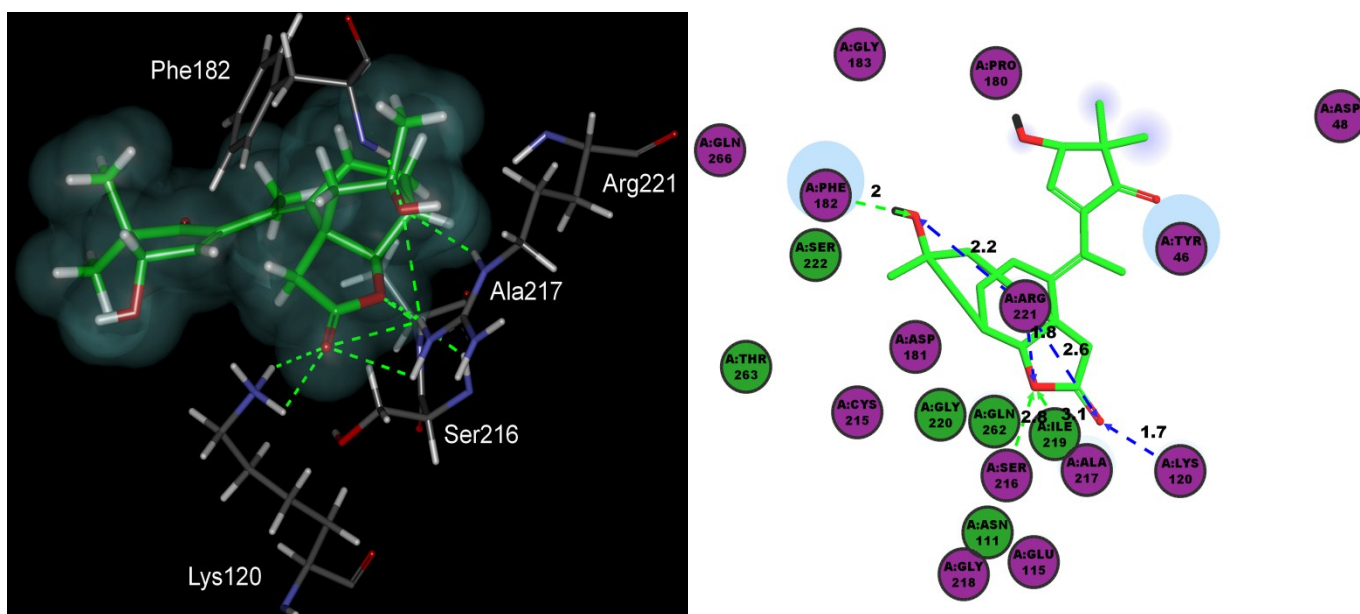

**Figure S14.** Molecular docking models for PTP1B inhibition of mollactone A (1).

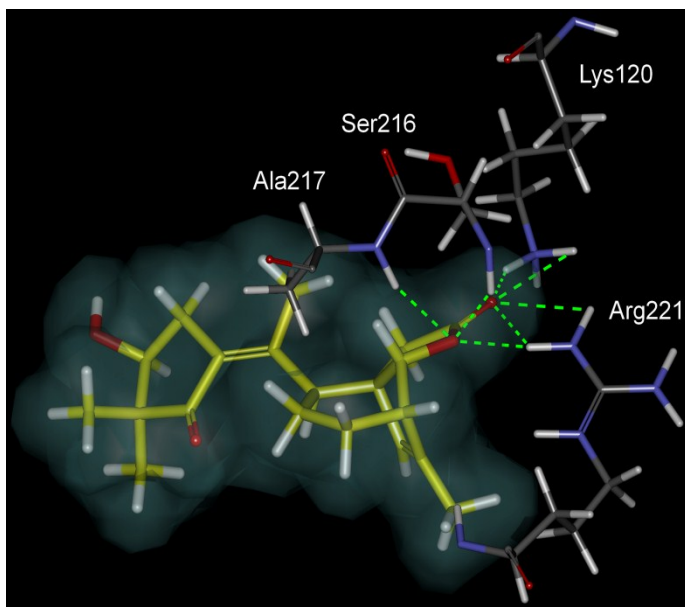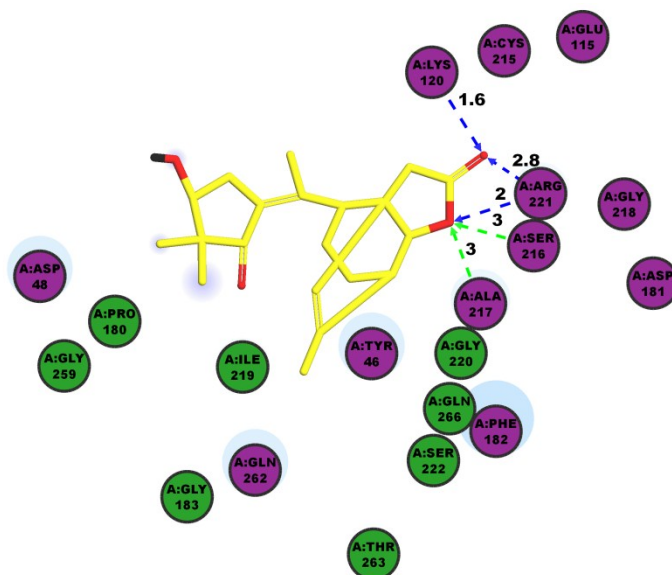

**Figure S15.** Molecular docking models for PTP1B inhibition of mollactone B (2).

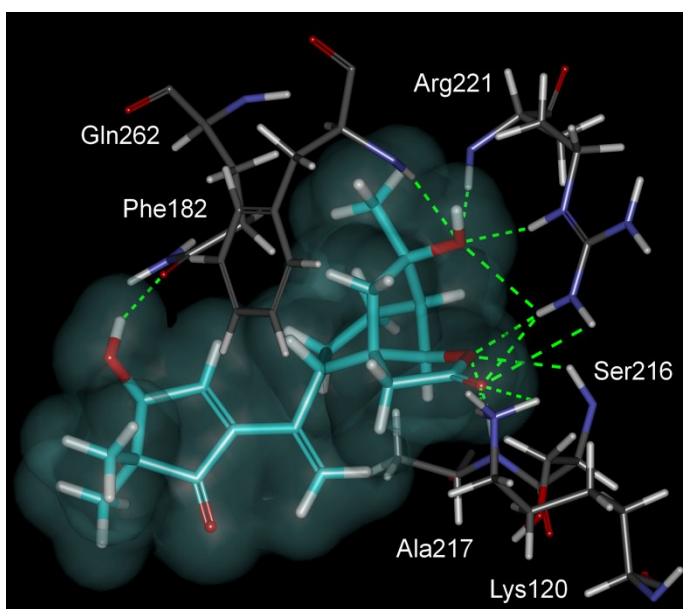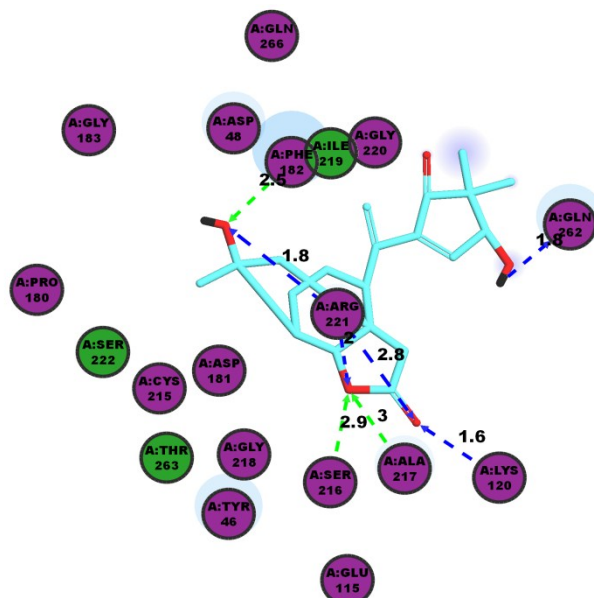

**Figure S16.** Molecular docking models for PTP1B inhibition of mollactone C (3).

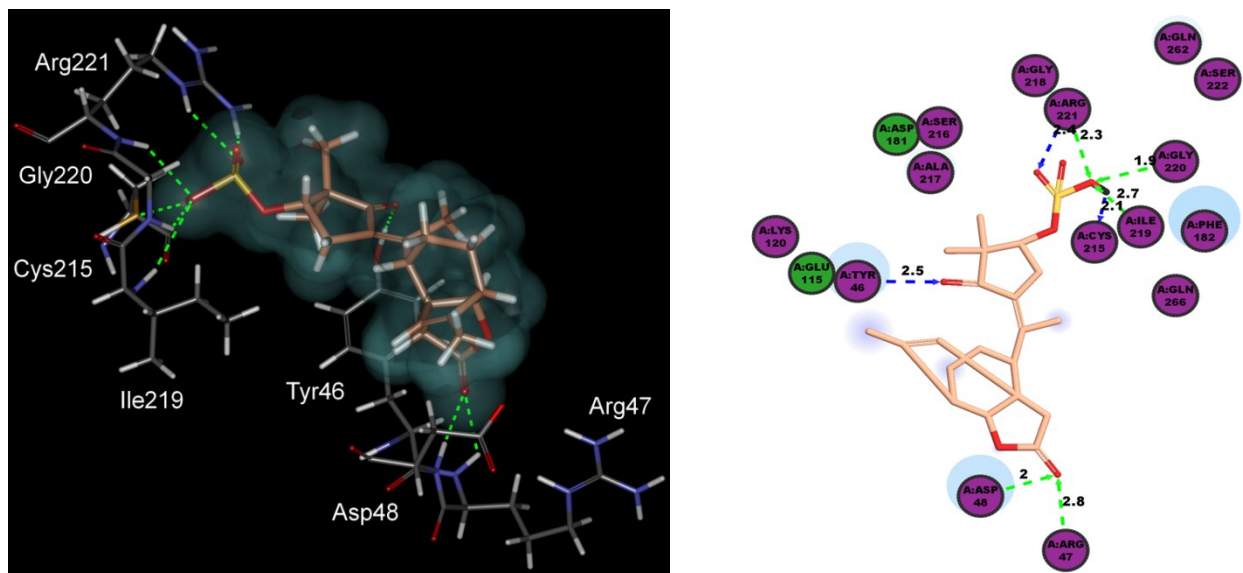

**Figure S17.** Molecular docking models for PTP1B inhibition of mollactone B 3-*O*-sulfate (9).

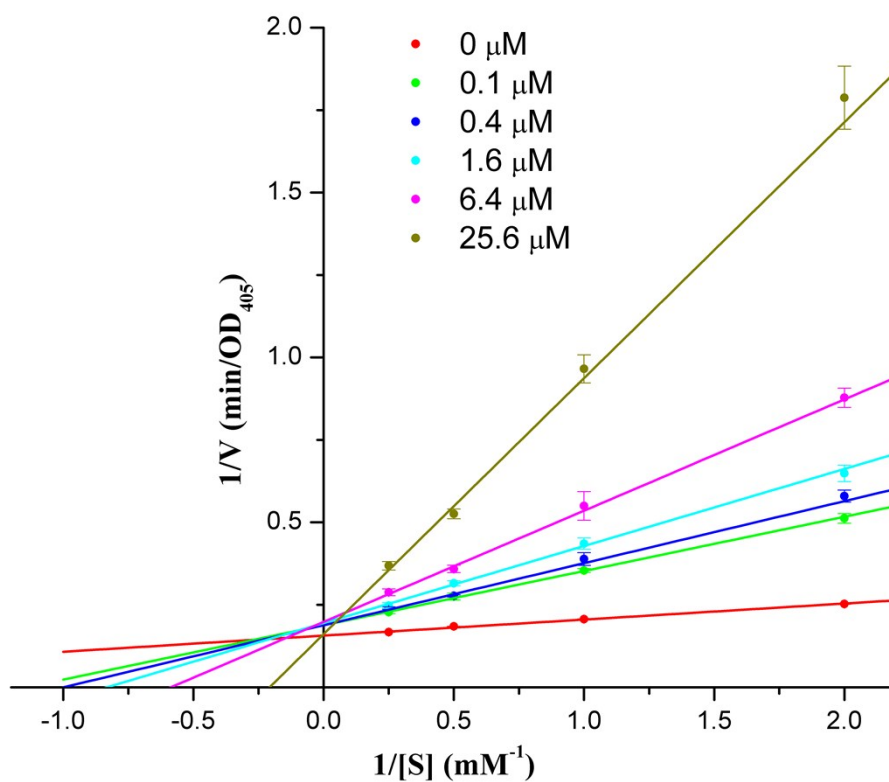

**Figure S18.** Lineweaver-Burk plot for the inhibition of PTP1B by mollactone B 3-*O*-sulfate (9).



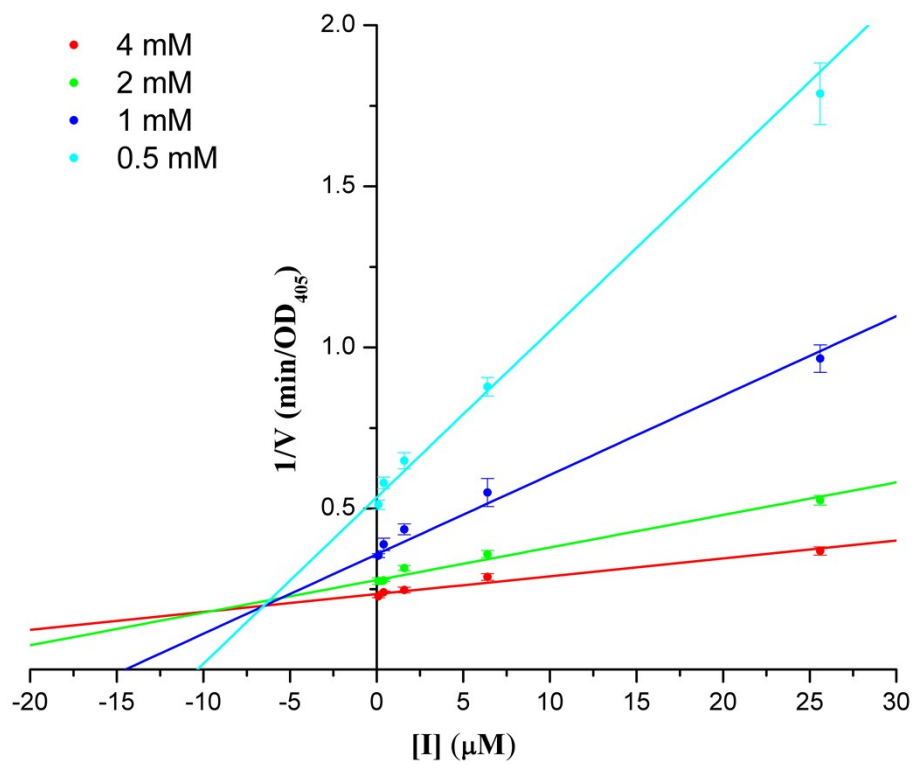

**Figure S19.** Dixon plot for the inhibition of the PTP1B by mollactone B 3-*O*-sulfate (9).

**Table S2.** Effect of different concentrations of mollactone A (**1**) on  $V_{\max}$ ,  $K_m$ , and the  $K_{ik}$  to  $K_{iv}$  ratio using *p*NPP as a substrate.

$V_{\max}$  and  $K_m$  values were calculated according to Lineweaver-Burk from the data shown in Fig. S10.  $K_{ik}/K_{iv}$  ratio was calculated according to Yang et al.

| Inhibitor ( <b>1</b> )<br>[I] ( $\mu$ M) | Substrate ( <i>p</i> NPP) |       |                 |
|------------------------------------------|---------------------------|-------|-----------------|
|                                          | $V_{\max}$                | $K_m$ | $K_{ik}/K_{iv}$ |
| 0                                        | 6.39                      | 0.31  | -               |
| 0.1                                      | 5.41                      | 1.57  | 22.44           |
| 0.4                                      | 5.61                      | 1.89  | 36.66           |
| 1.6                                      | 5.38                      | 1.97  | 28.52           |
| 6.4                                      | 5.61                      | 2.03  | 39.91           |
| 25.6                                     | 5.57                      | 1.56  | 27.39           |

**Table S3.** Effect of different concentrations of mollactone B (**2**) on  $V_{\max}$ ,  $K_m$ , and the  $K_{ik}$  to  $K_{iv}$  ratio using *p*NPP as a substrate.

$V_{\max}$  and  $K_m$  values were calculated according to Lineweaver-Burk from the data shown in Fig. S12.  $K_{ik}/K_{iv}$  ratio was calculated according to Yang et al.

| Inhibitor ( <b>2</b> )<br>[I] ( $\mu$ M) | Substrate ( <i>p</i> NPP) |       |                 |
|------------------------------------------|---------------------------|-------|-----------------|
|                                          | $V_{\max}$                | $K_m$ | $K_{ik}/K_{iv}$ |
| 0                                        | 6.39                      | 0.31  | -               |
| 0.1                                      | 5.04                      | 1.42  | 13.37           |
| 0.4                                      | 4.93                      | 1.60  | 14.05           |
| 1.6                                      | 4.98                      | 1.70  | 15.84           |
| 6.4                                      | 5.67                      | 2.01  | 43.19           |
| 25.6                                     | 5.46                      | 1.54  | 23.29           |

**Table S4.** Effect of different concentrations of mollactone C (**3**) on  $V_{\max}$ ,  $K_m$ , and the  $K_{ik}$  to  $K_{iv}$  ratio using *p*NPP as a substrate.

$V_{\max}$  and  $K_m$  values were calculated according to Lineweaver-Burk from the data shown in Fig. S14.  $K_{ik}/K_{iv}$  ratio was calculated according to Yang et al.

| Inhibitor ( <b>3</b> )<br>[I] ( $\mu$ M) | Substrate ( <i>p</i> NPP) |       |                 |
|------------------------------------------|---------------------------|-------|-----------------|
|                                          | $V_{\max}$                | $K_m$ | $K_{ik}/K_{iv}$ |
| 0                                        | 6.39                      | 0.31  | -               |
| 0.1                                      | 4.64                      | 1.38  | 9.15            |
| 0.4                                      | 4.72                      | 1.66  | 12.31           |
| 1.6                                      | 4.89                      | 1.89  | 16.62           |
| 6.4                                      | 5.74                      | 2.32  | 57.26           |
| 25.6                                     | 4.80                      | 1.58  | 12.37           |

**Table S5.** Effect of different concentrations of mollactone B 3-*O*-sulfate (**9**) on  $V_{\max}$ ,  $K_m$ , and the  $K_{ik}$  to  $K_{iv}$  ratio using *p*NPP as a substrate.

$V_{\max}$  and  $K_m$  values were calculated according to Lineweaver-Burk from the data shown in Fig. S16.  $K_{ik}/K_{iv}$  ratio was calculated according to Yang et al.

| Inhibitor ( <b>9</b> )<br>[I] ( $\mu$ M) | Substrate ( <i>p</i> NPP) |       |                 |
|------------------------------------------|---------------------------|-------|-----------------|
|                                          | $V_{\max}$                | $K_m$ | $K_{ik}/K_{iv}$ |
| 0                                        | 6.39                      | 0.31  | -               |
| 0.1                                      | 5.32                      | 0.86  | 8.82            |
| 0.4                                      | 5.32                      | 0.95  | 10.26           |
| 1.6                                      | 5.14                      | 0.97  | 8.75            |
| 6.4                                      | 5.05                      | 0.88  | 6.93            |
| 25.6                                     | 6.22                      | 1.01  | 82.62           |

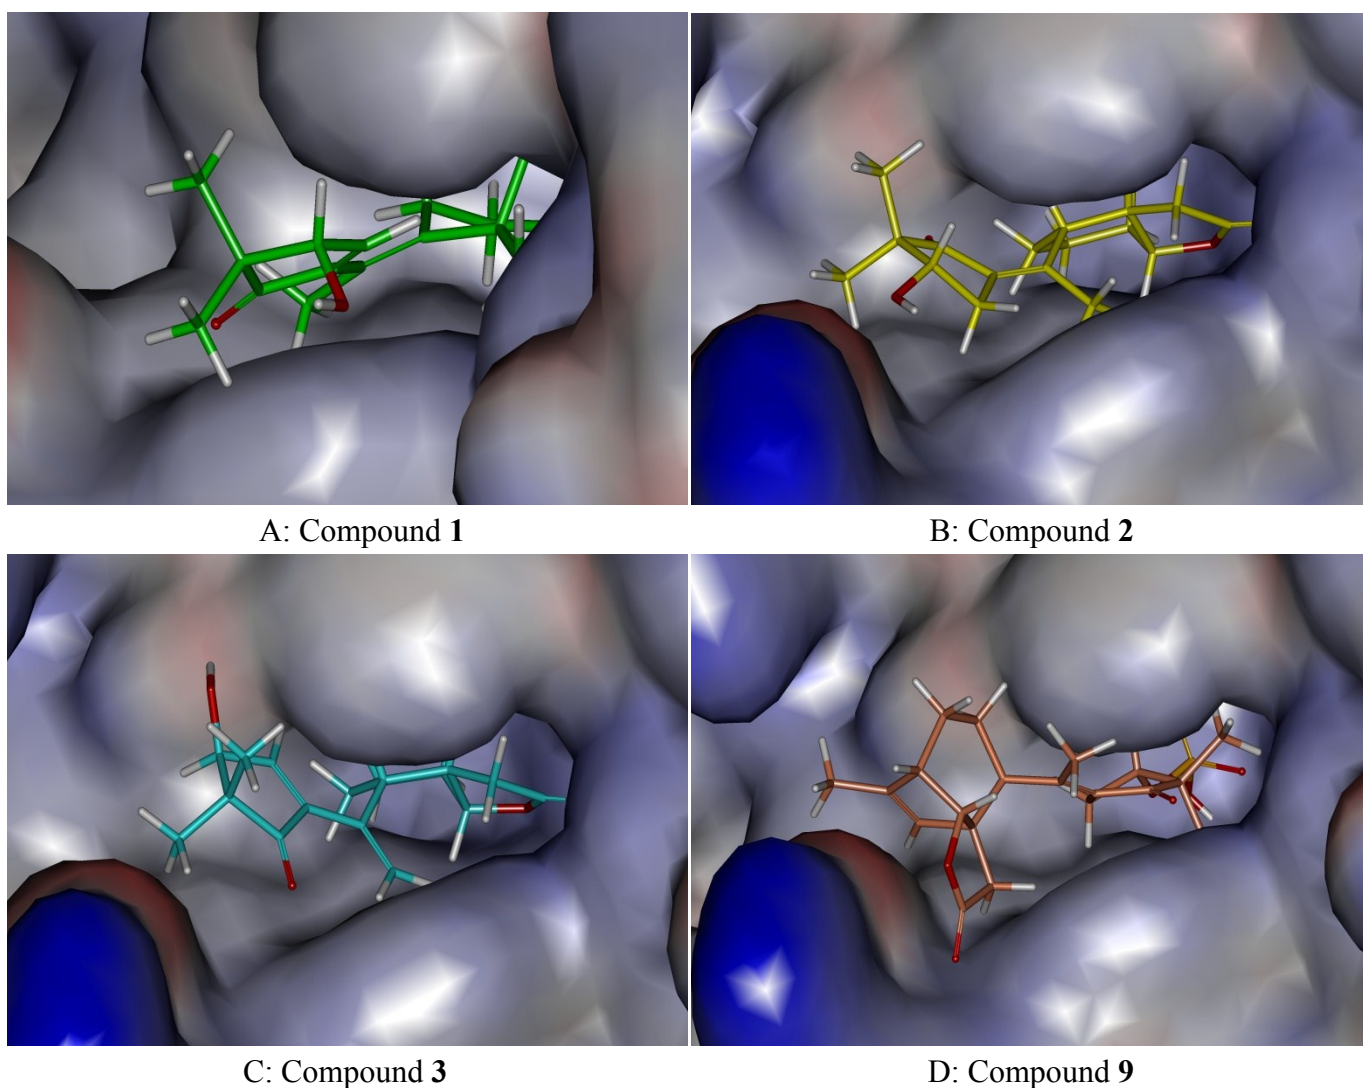

**Figure S20.** The docked conformation of mollactones A–C (**1–3**) and mollactone B 3-*O*-sulfate (**9**) in the binding pocket of PTP1B.

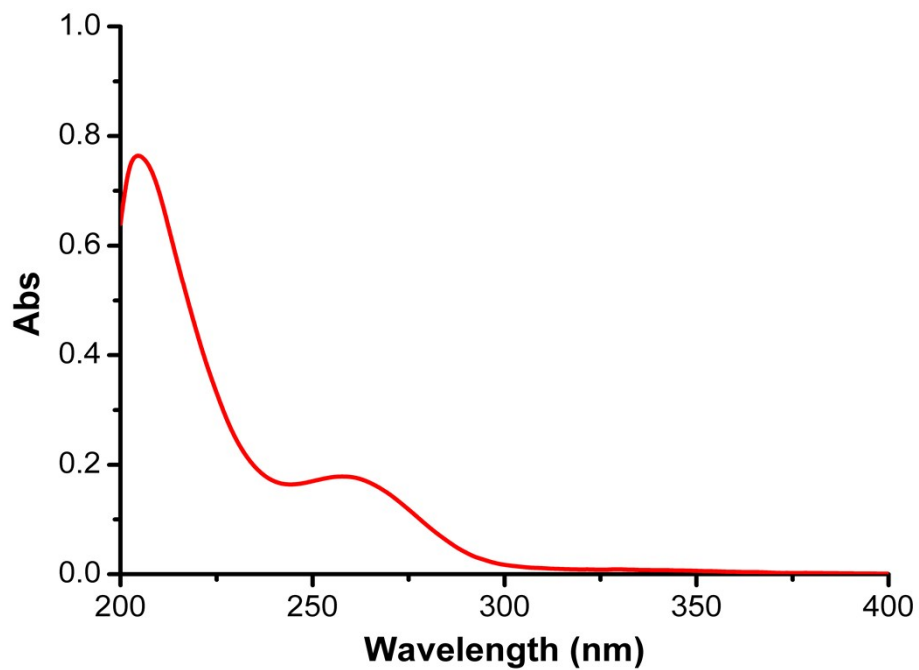

**Figure S21.** The UV spectrum of **1** in methanol.

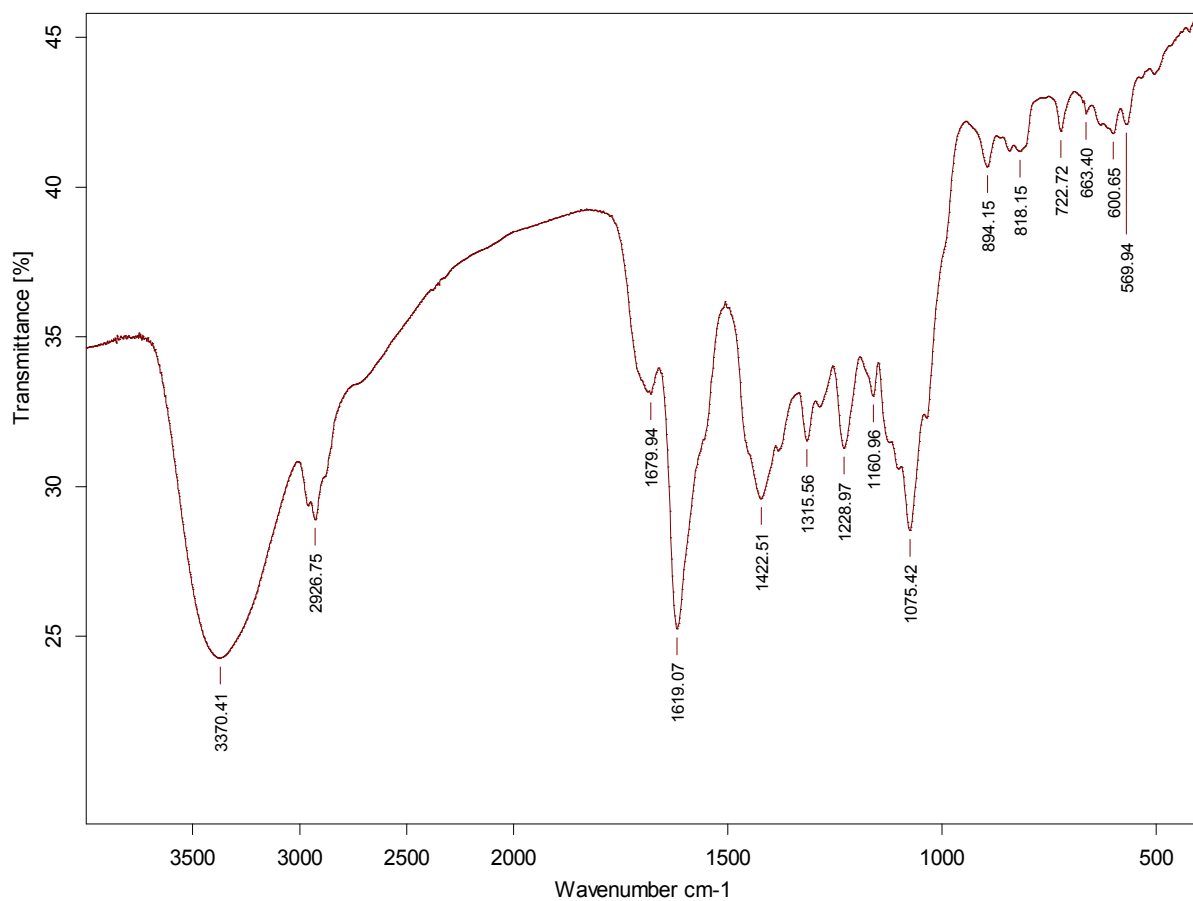

**Figure S22.** The IR spectrum of **1**.

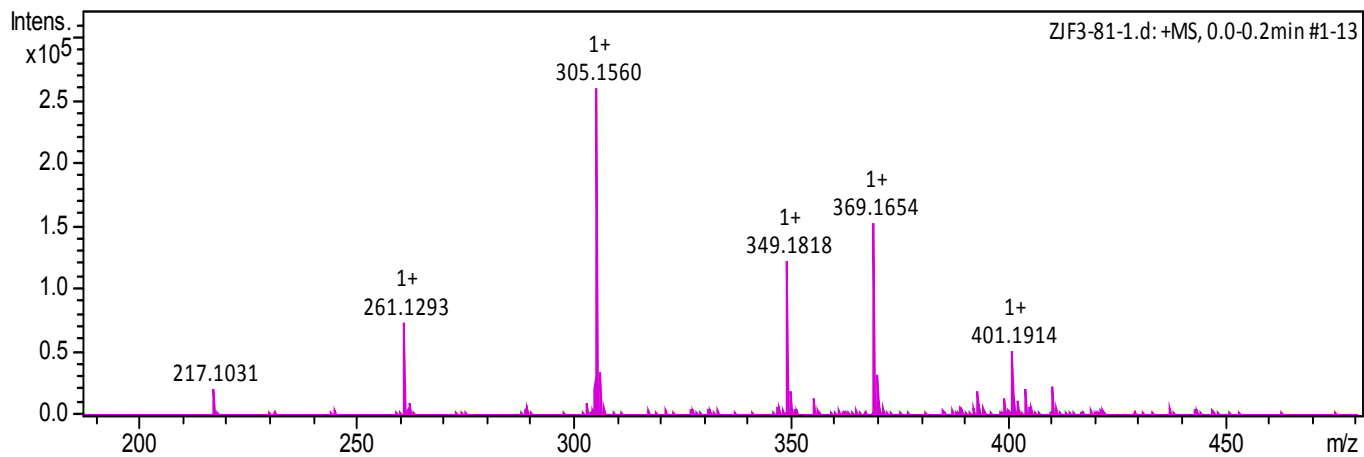

Figure S23. HR-ESI-MS spectrum of 1.

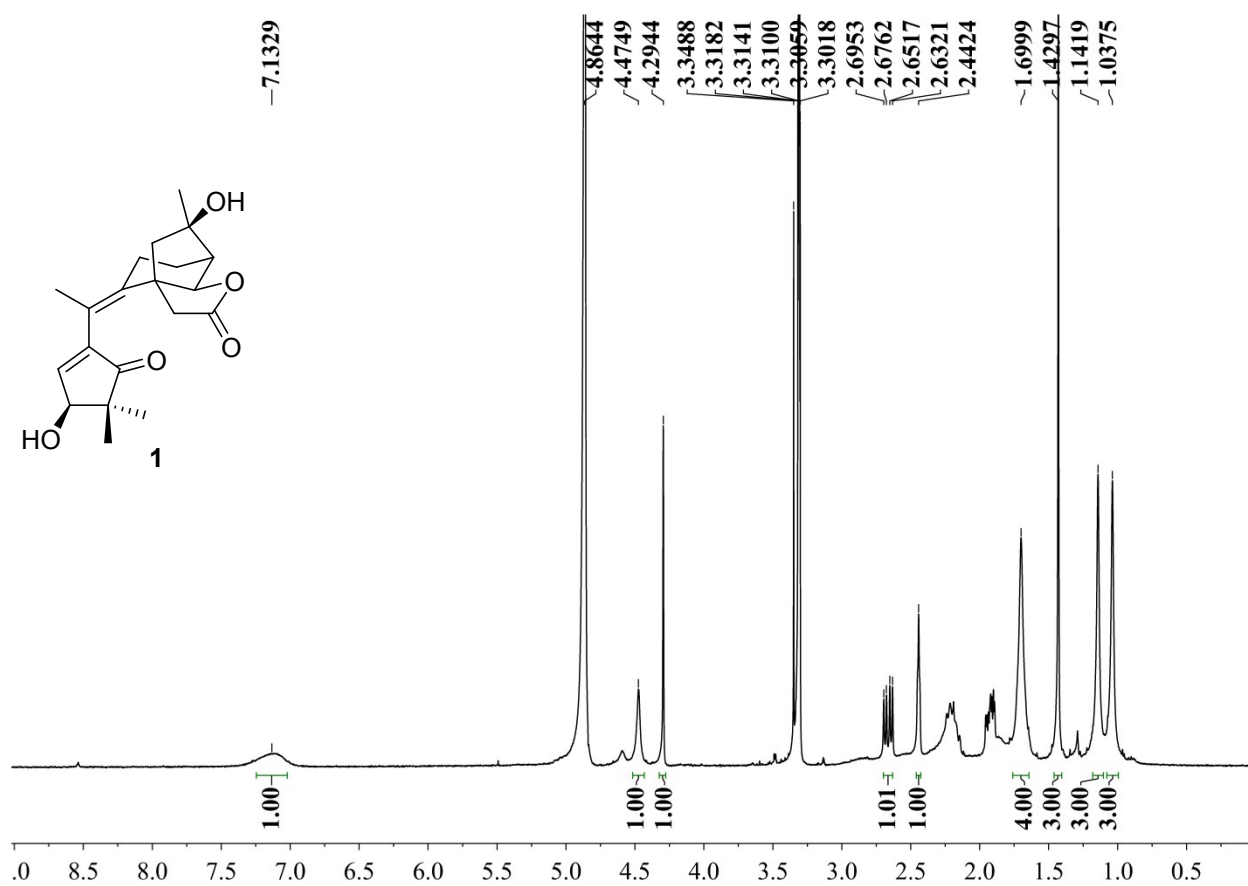

Figure S24. <sup>1</sup>H NMR spectrum of 1 (400 MHz, methanol-d<sub>4</sub>)

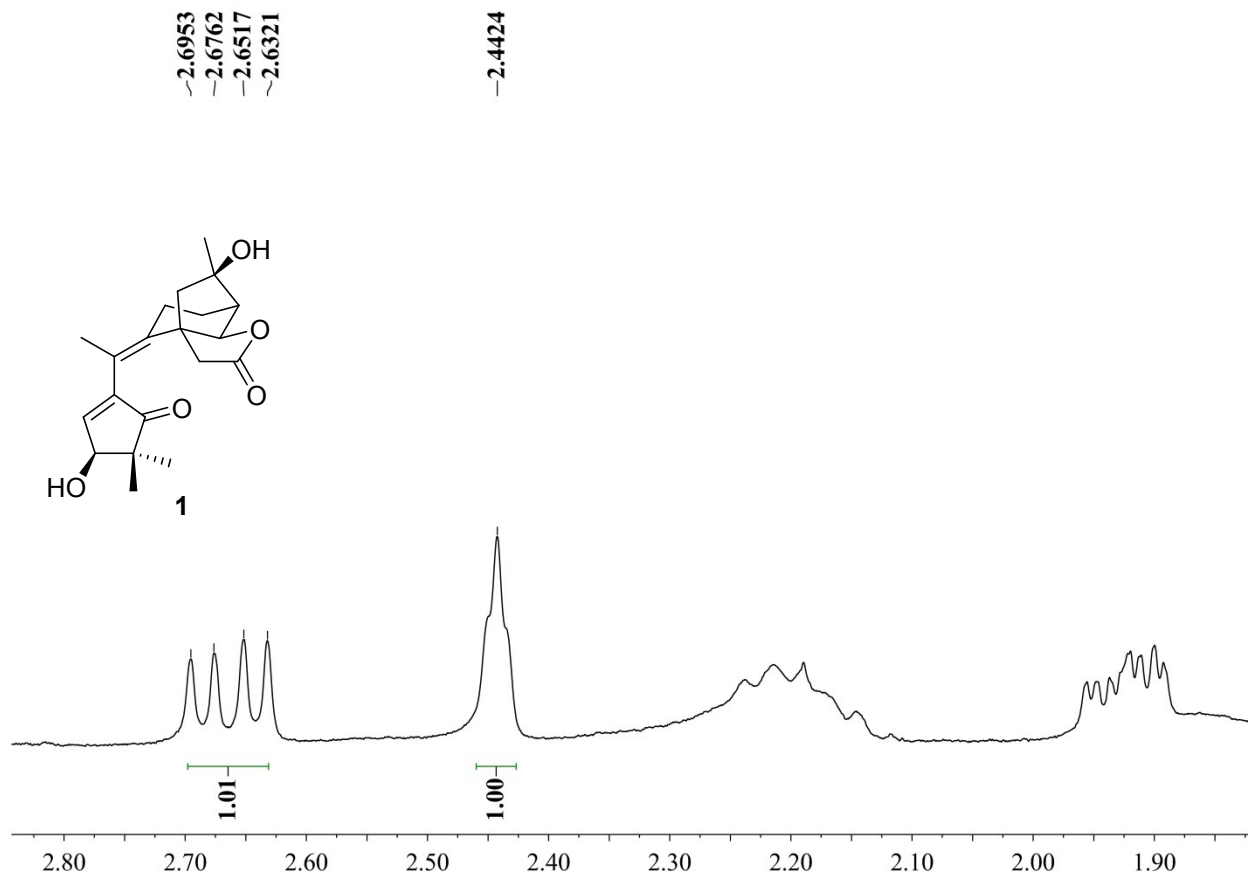

**Figure S25.**  $^1\text{H}$  NMR spectrum of **1** (400 MHz, methanol- $d_4$ , amplified)

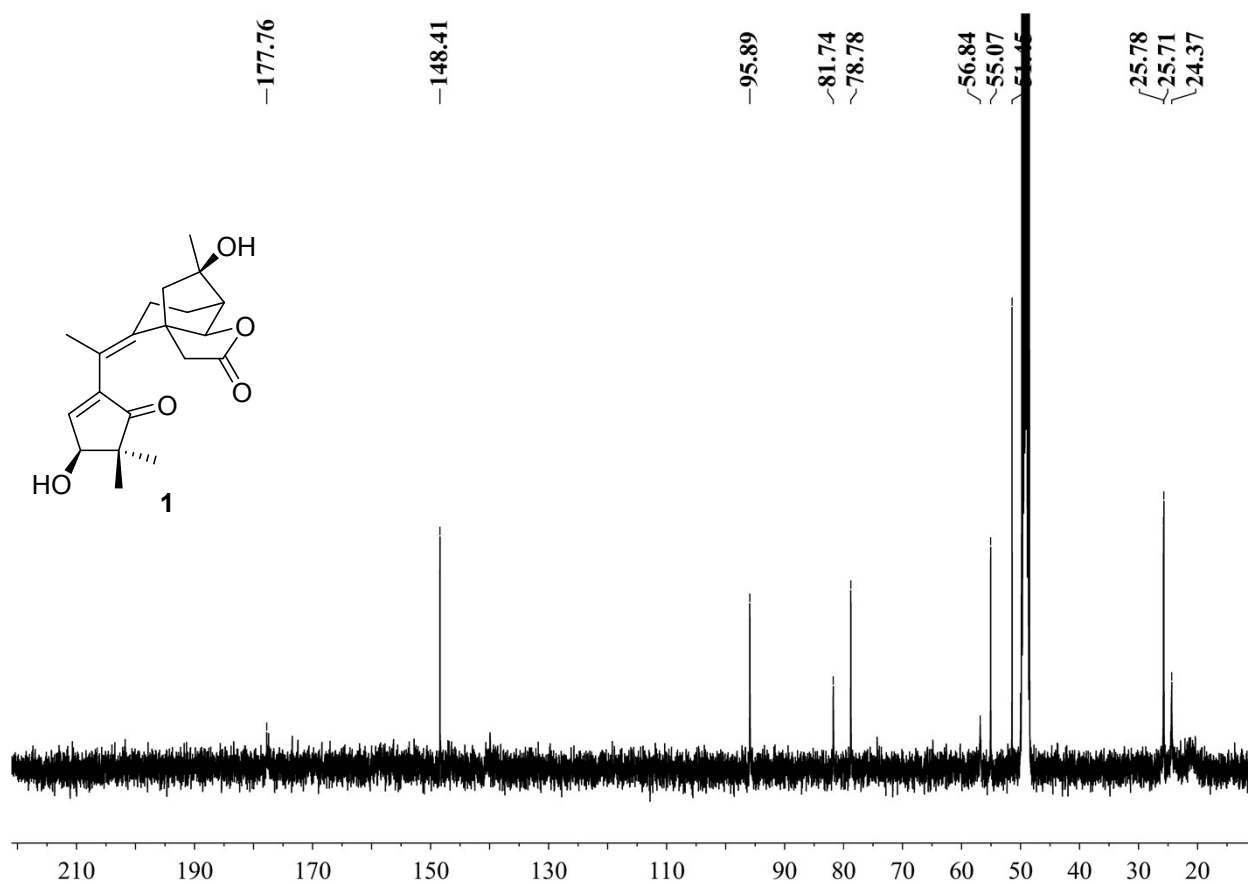

**Figure S26.**  $^{13}\text{C}$  NMR spectrum of **1** (100 MHz, methanol- $d_4$ )

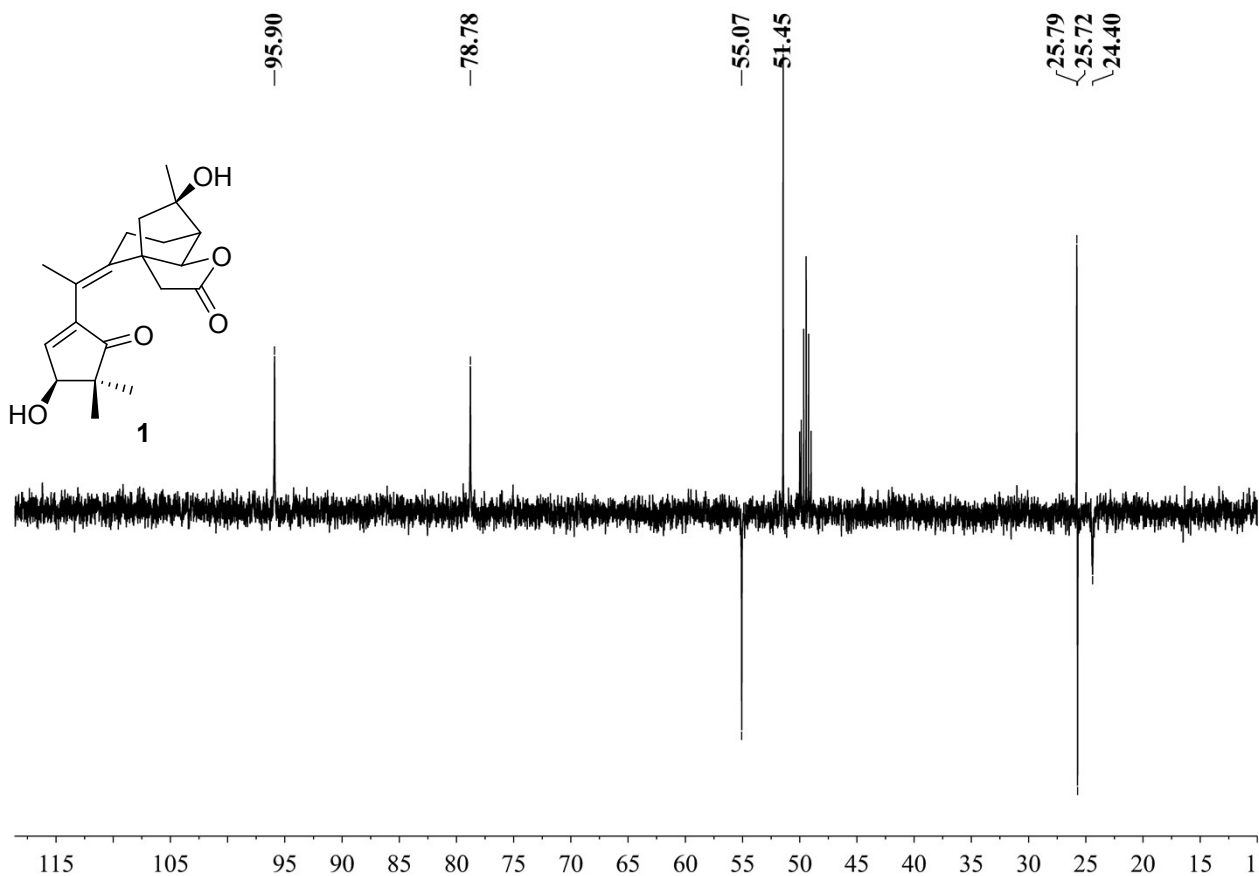

**Figure S27.** DEPT spectrum of **1** (100 MHz, methanol- $d_4$ )

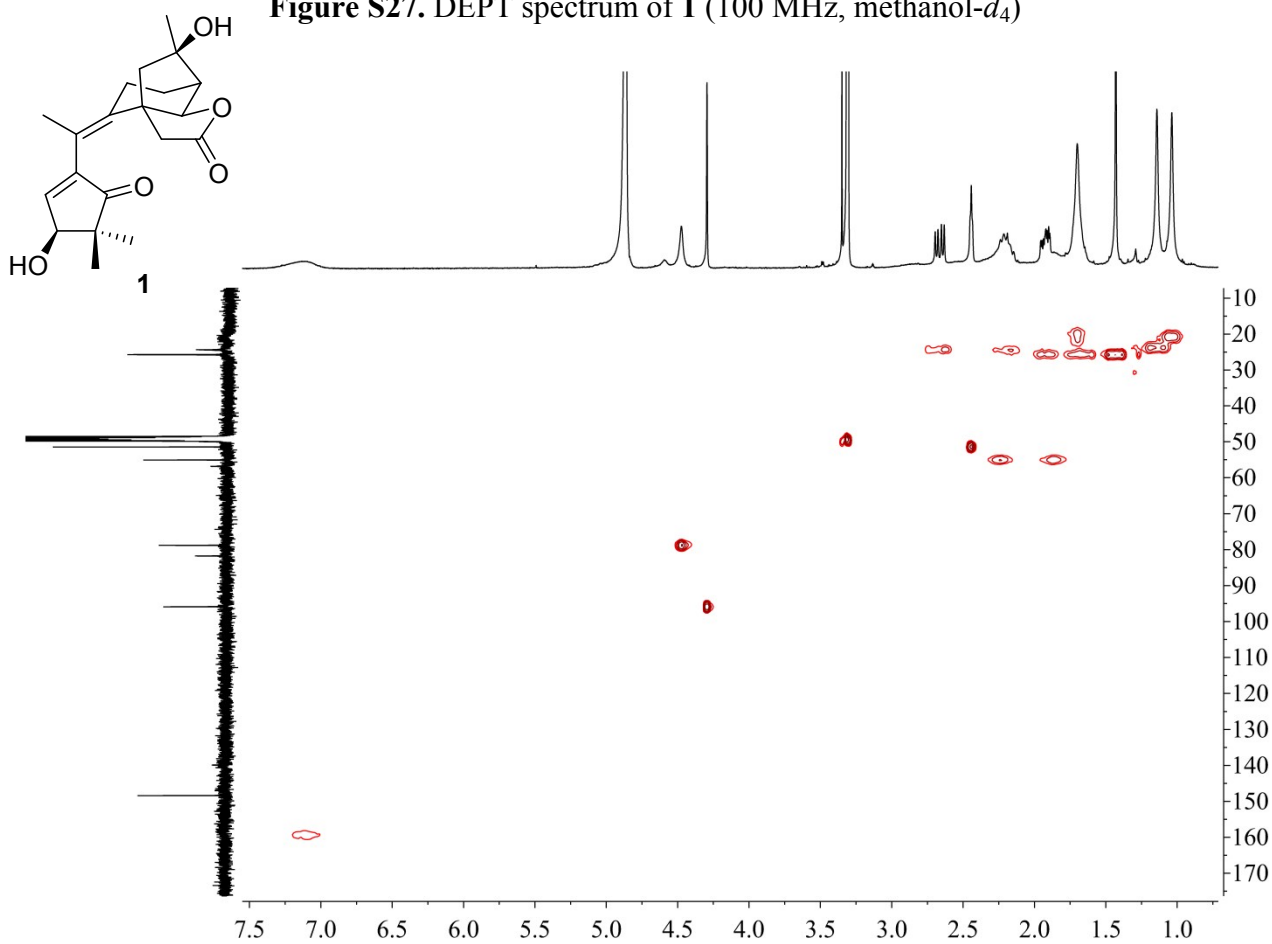

**Figure S28.** HSQC spectrum of **1** ( $^1\text{H}$ : 400 MHz,  $^{13}\text{C}$ : 100 MHz, methanol- $d_4$ )

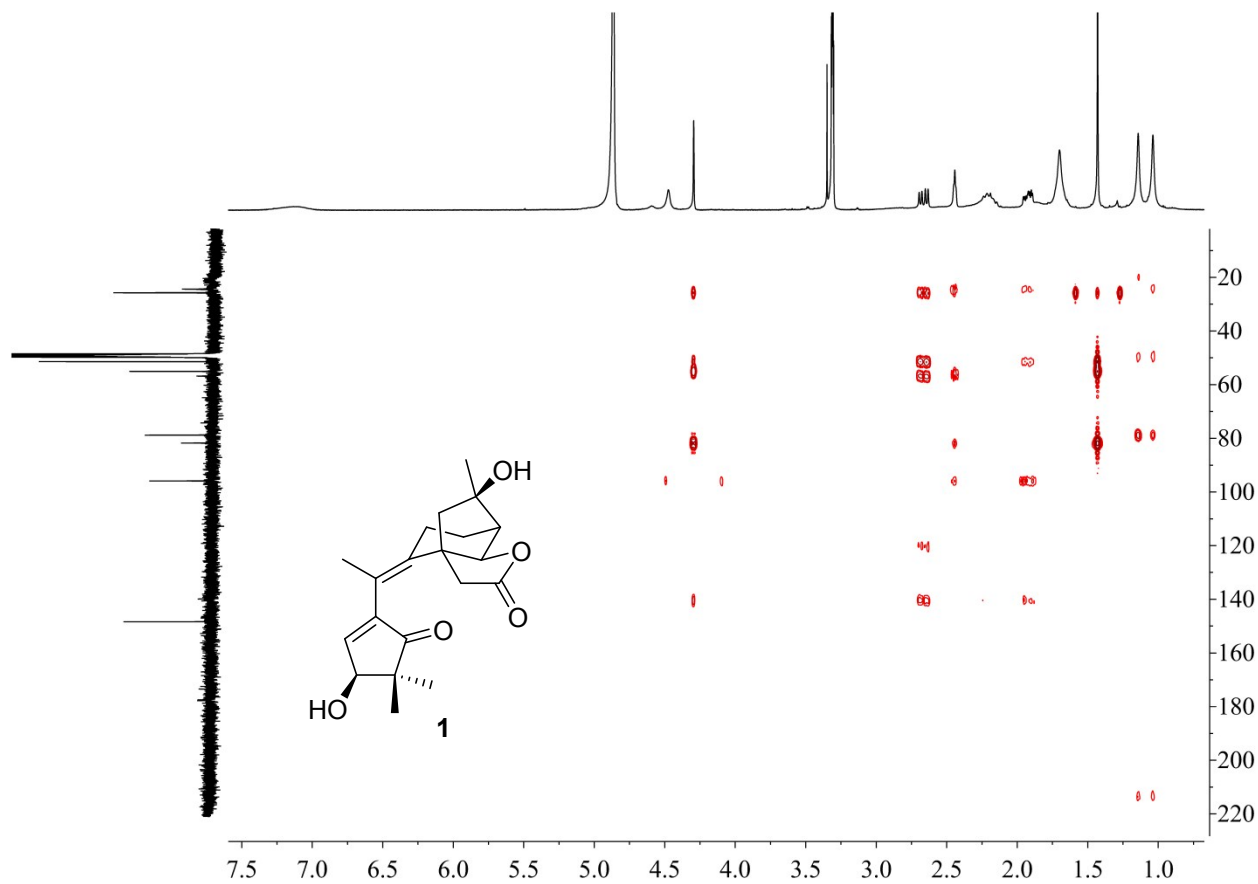

**Figure S29.** HMBC spectrum of **1** ( $^1\text{H}$ : 400 MHz,  $^{13}\text{C}$ : 100 MHz, methanol- $d_4$ )

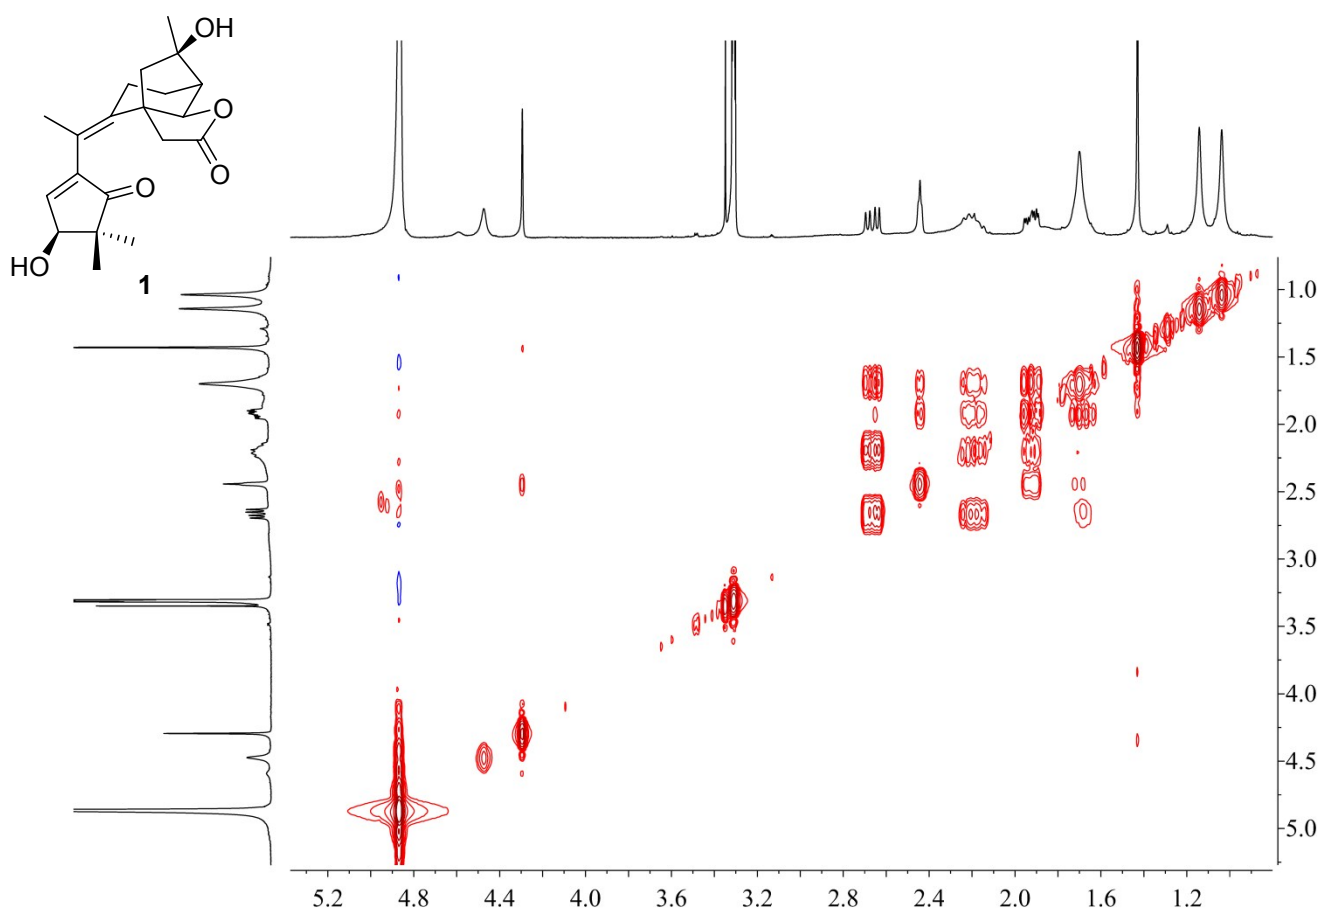

**Figure S30.**  $^1\text{H}$ - $^1\text{H}$  COSY spectrum of **1** (400 MHz, methanol- $d_4$ )



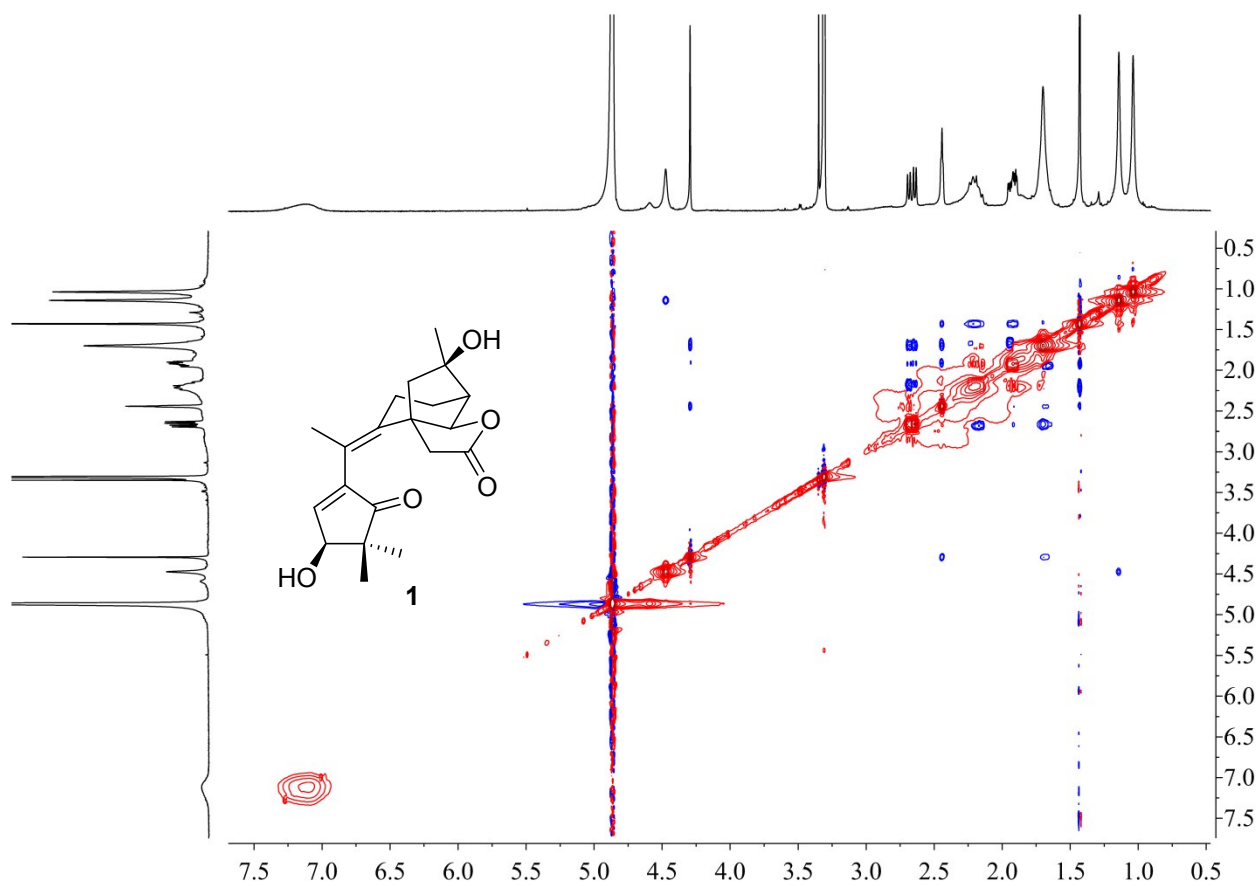

Figure S31. NOESY spectrum of **1** (400 MHz, methanol- $d_4$ )

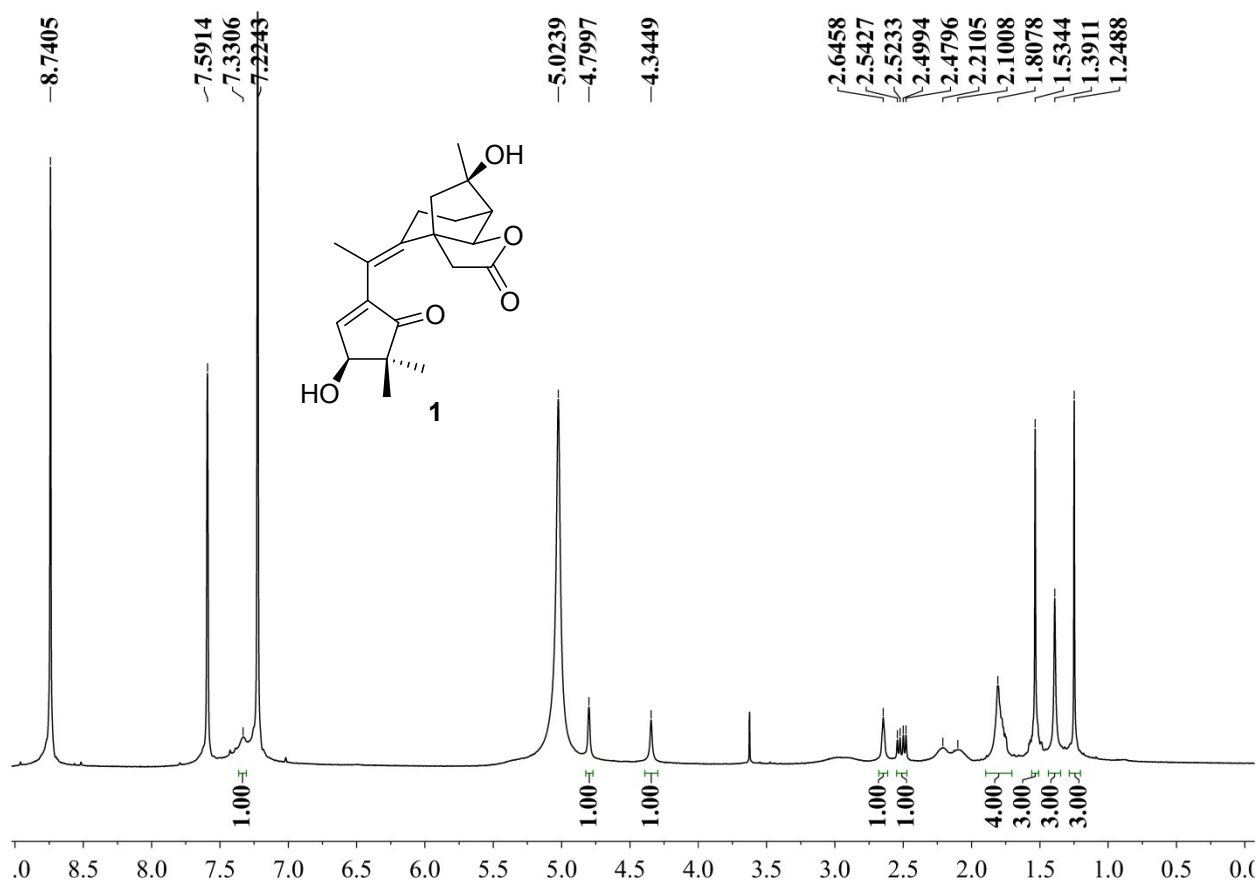

Figure S32.  $^1\text{H}$  NMR spectrum of **1** (400 MHz, pyridine- $d_5$ )

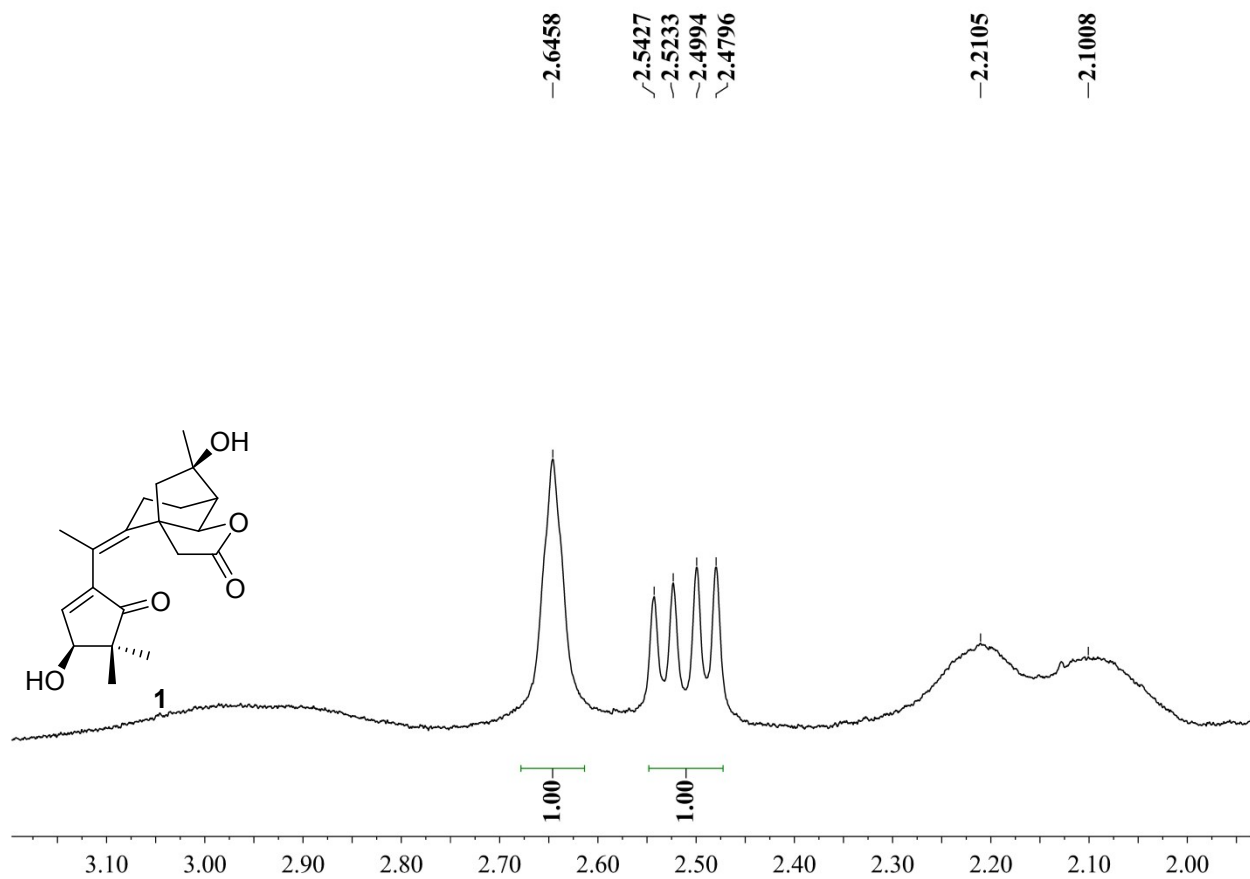

**Figure S33.**  $^1\text{H}$  NMR spectrum of **1** (400 MHz, pyridine- $d_5$ , amplified)

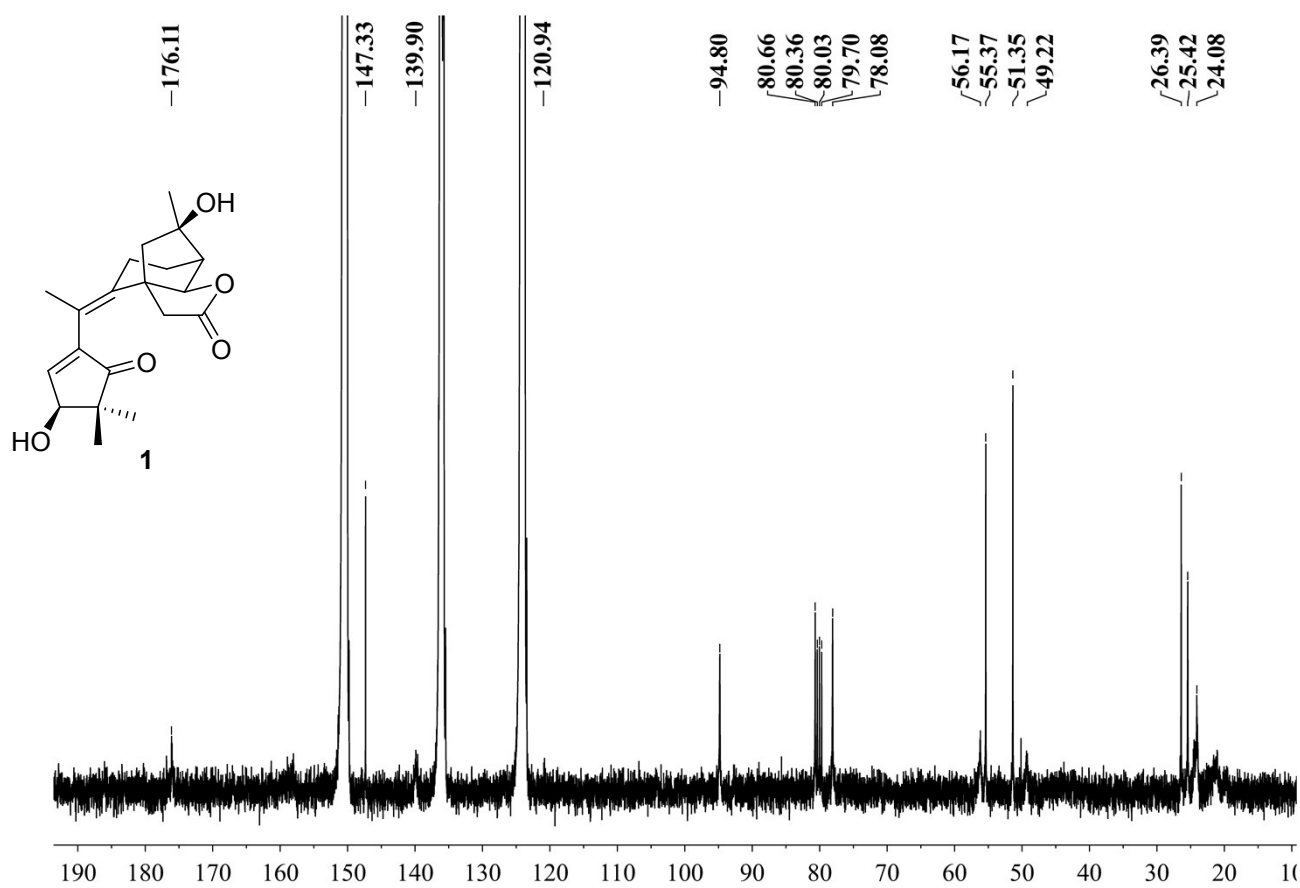

**Figure S34.**  $^{13}\text{C}$  NMR spectrum of **1** (100 MHz, pyridine- $d_5$ )

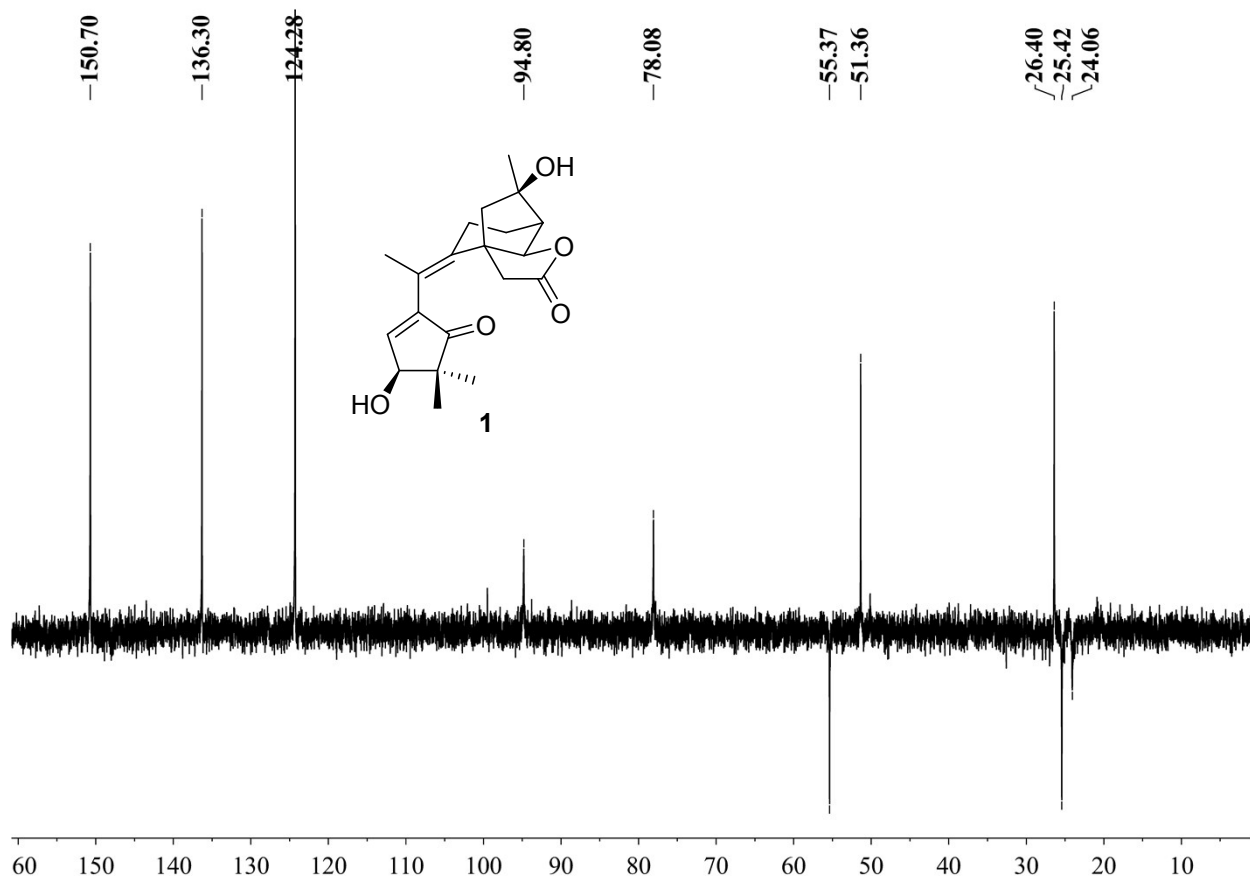

**Figure S35.** DEPT spectrum of **1** (100 MHz, pyridine-*d*<sub>5</sub>)

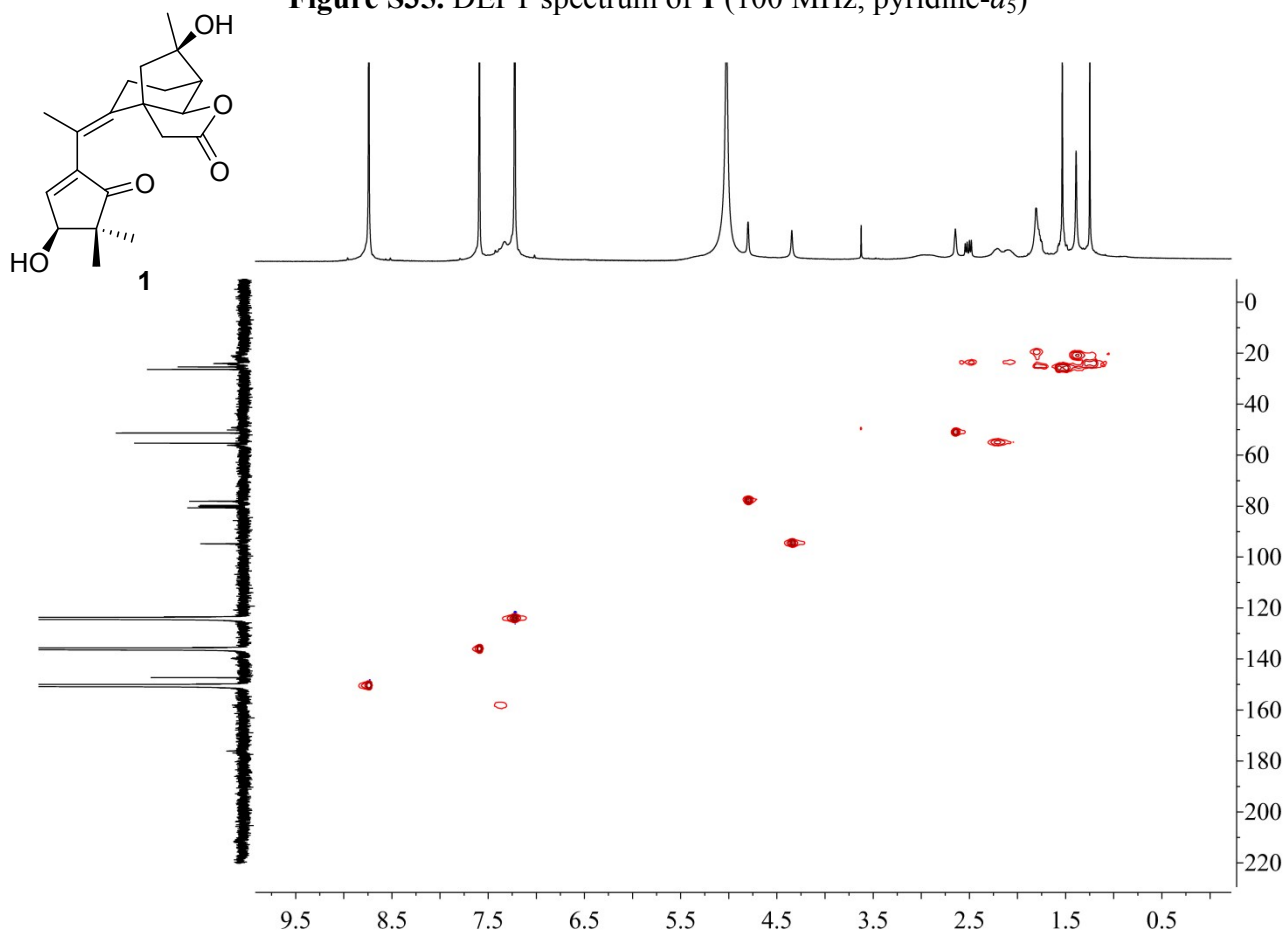

**Figure S36.** HSQC spectrum of **1** (<sup>1</sup>H: 400 MHz, <sup>13</sup>C: 100 MHz, pyridine-*d*<sub>5</sub>)

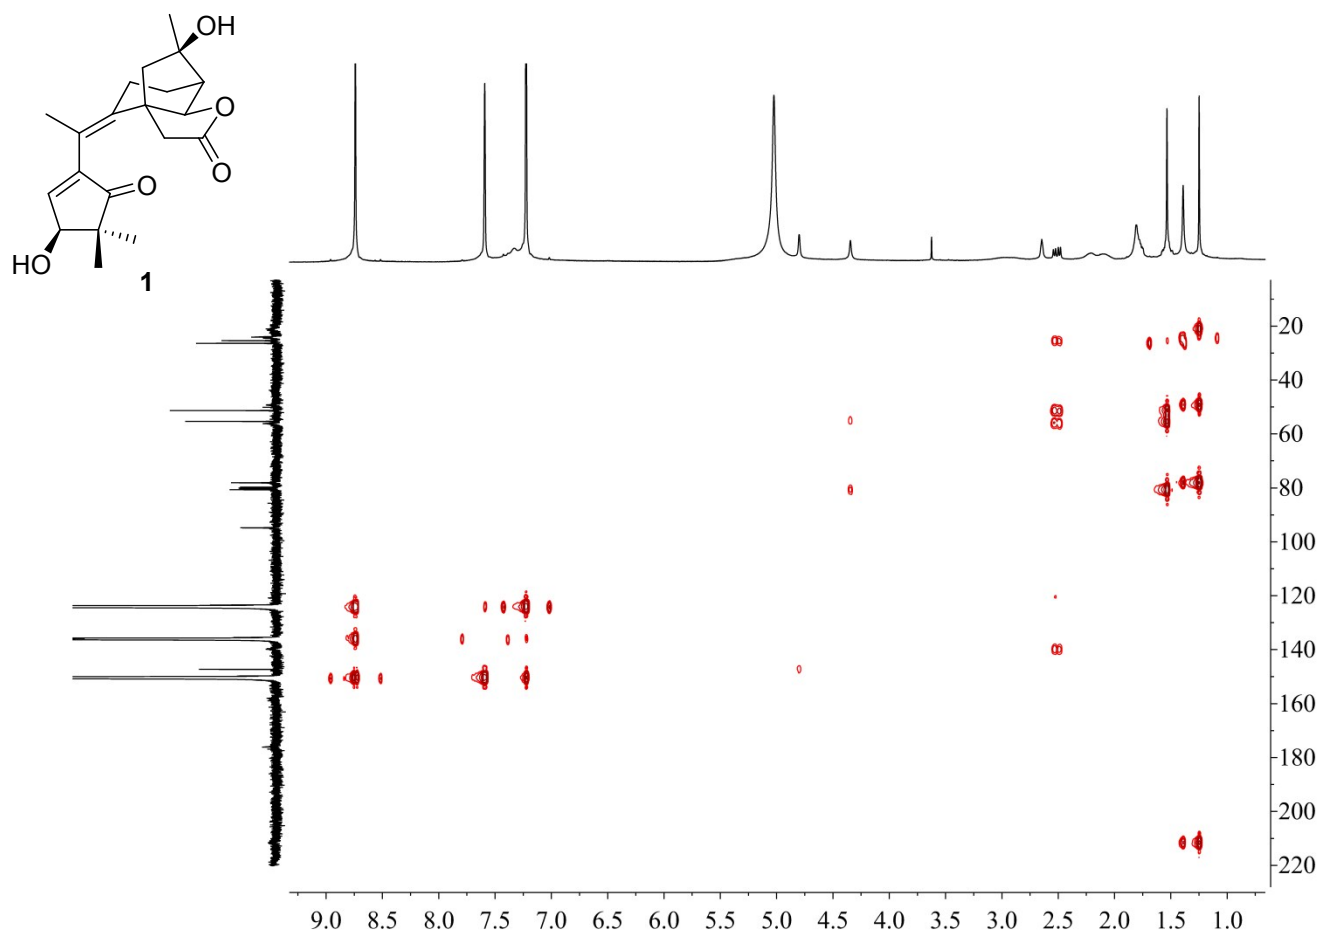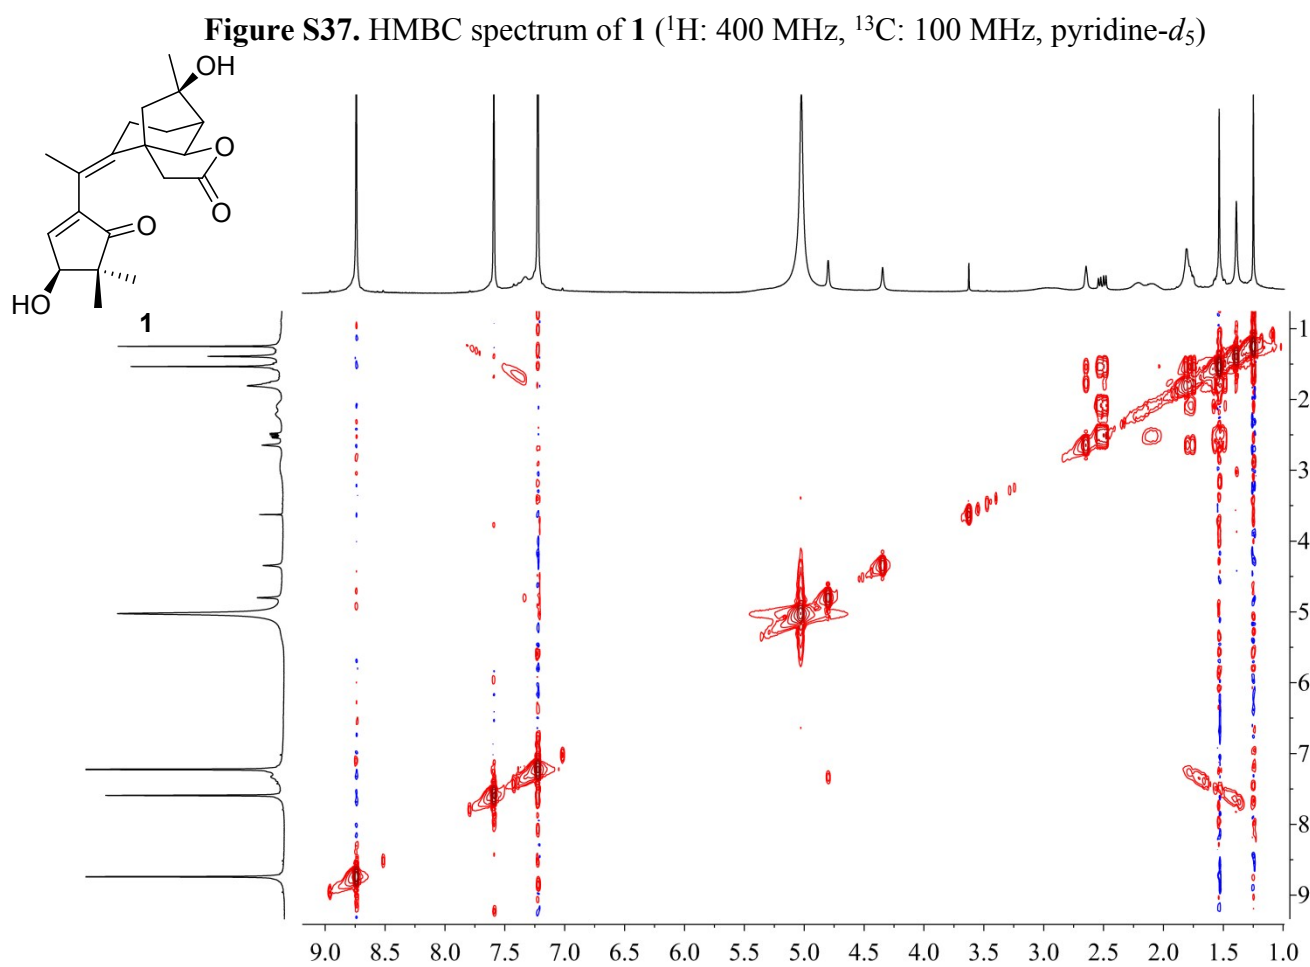

Figure S38.  $^1\text{H}$ - $^1\text{H}$  COSY spectrum of **1** (100 MHz, pyridine- $d_5$ )

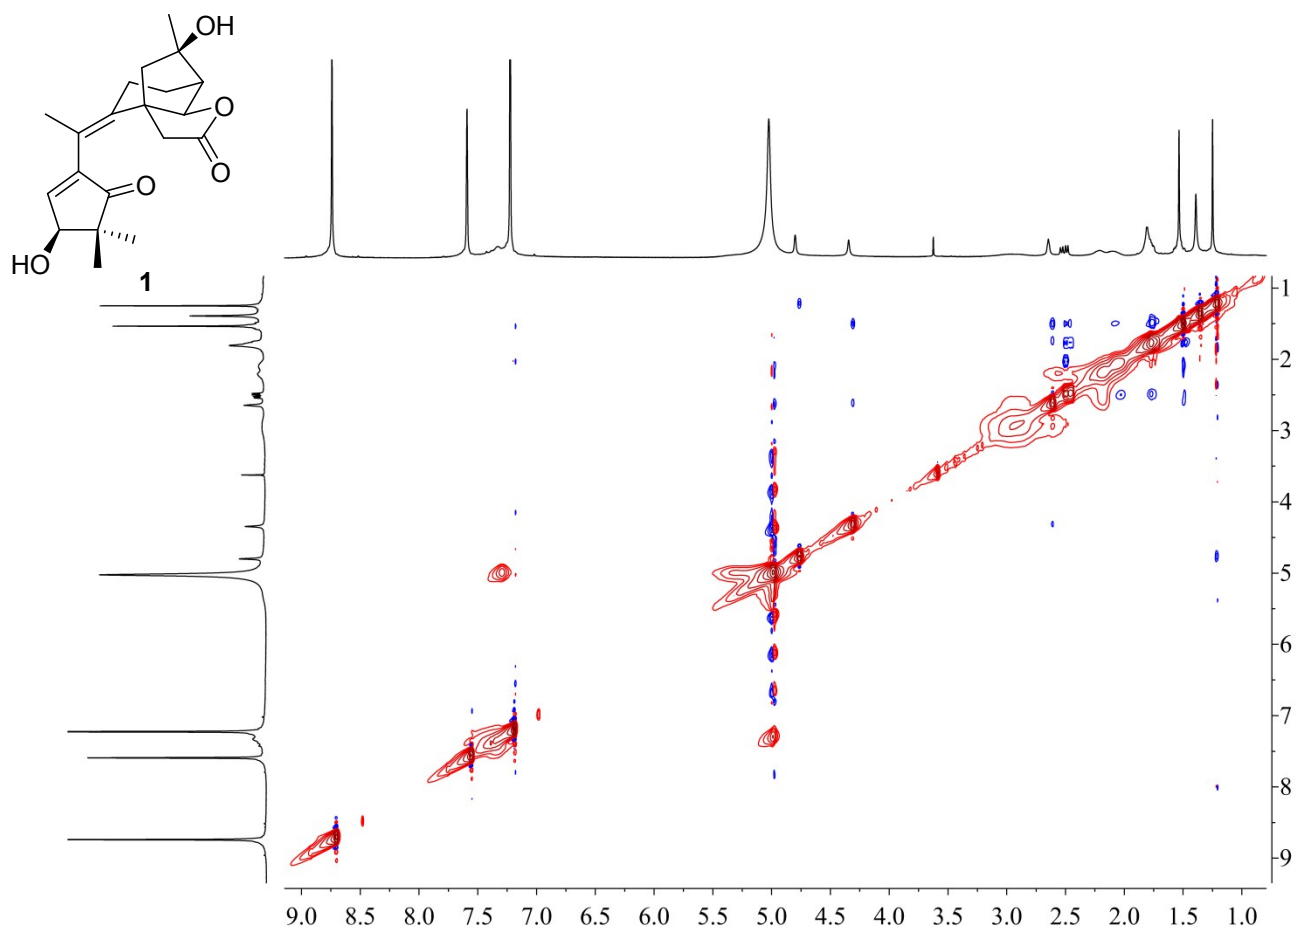

Figure S39. NOESY spectrum of **1** (100 MHz, pyridine- $d_5$ )

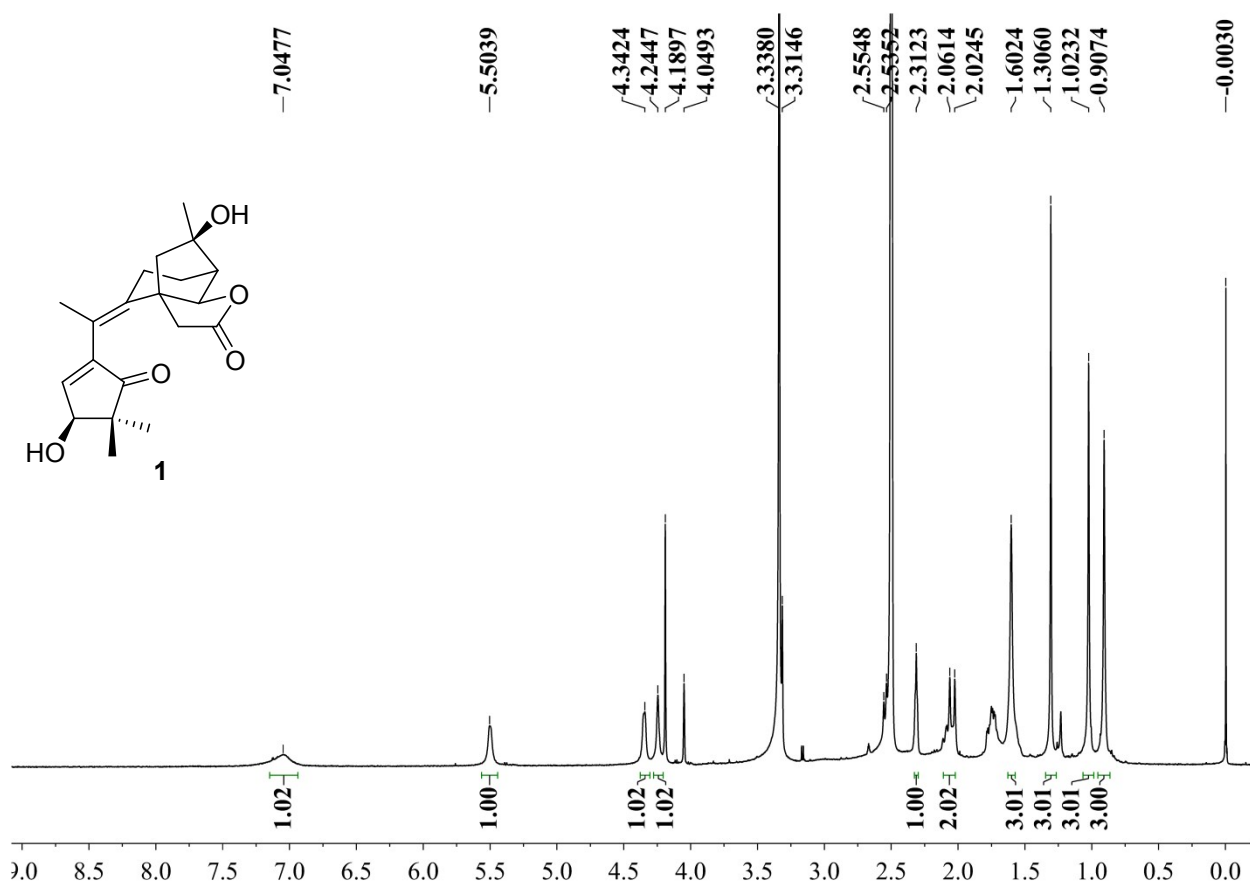

Figure S40.  $^1\text{H}$  NMR spectrum of **1** (400 MHz, DMSO- $d_6$ )



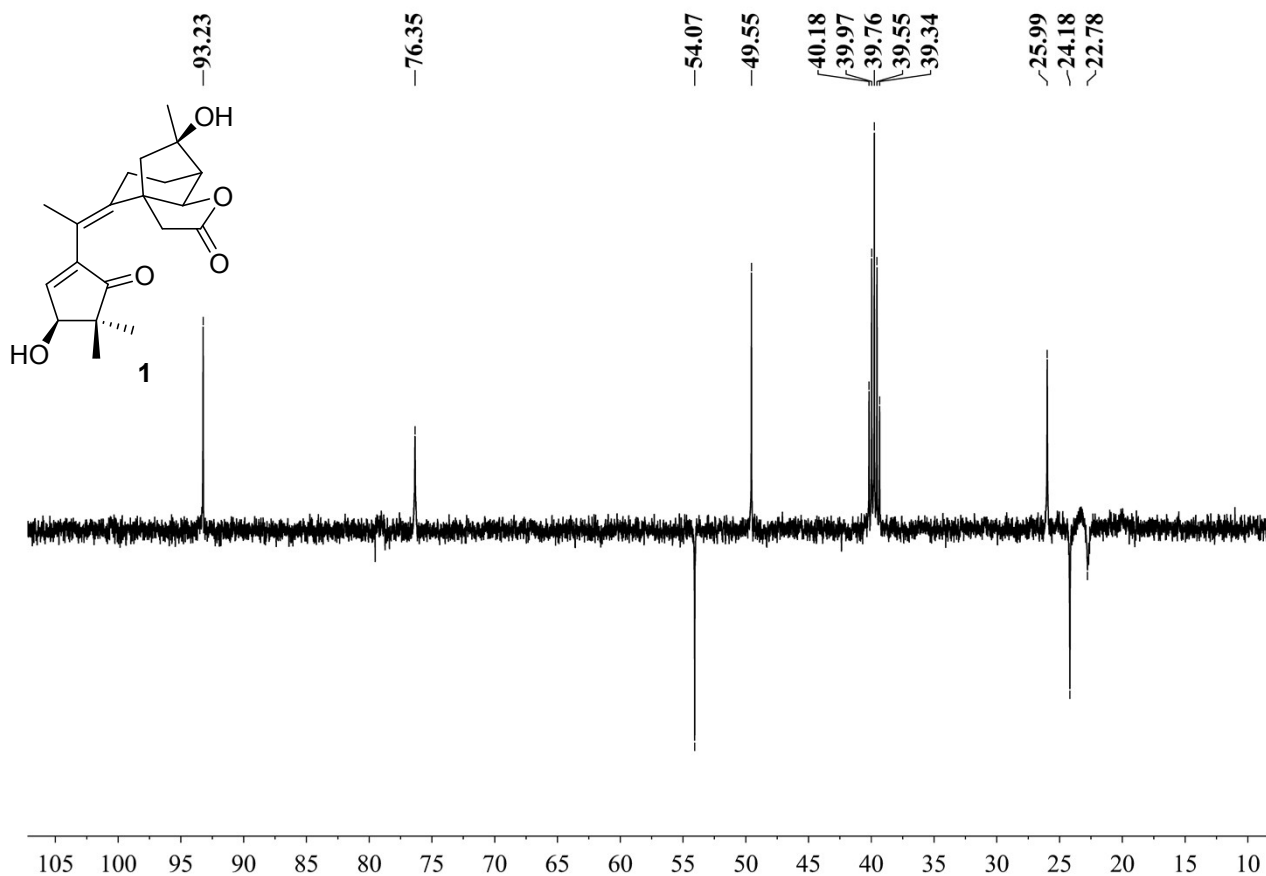

**Figure S43.** DEPT spectrum of **1** (100 MHz, DMSO- $d_6$ )

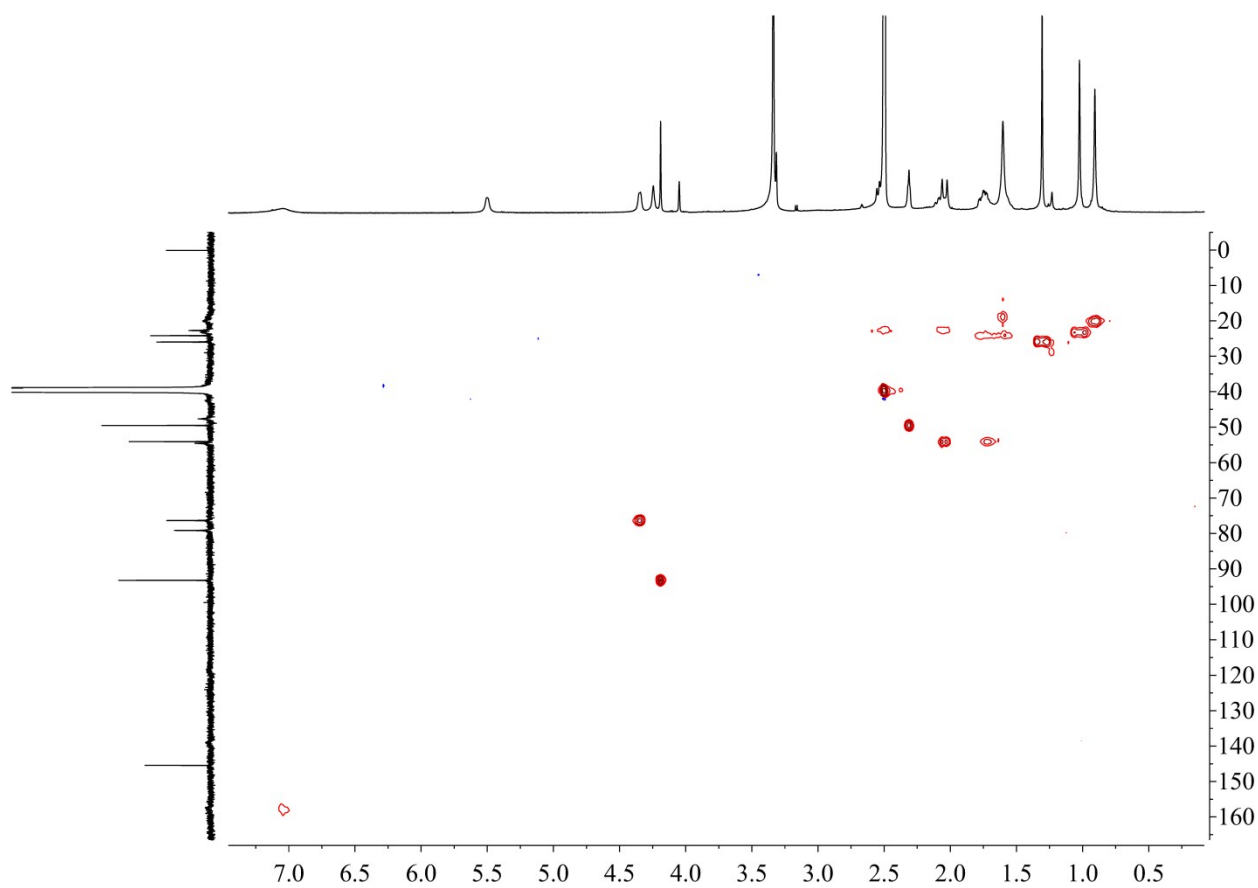

**Figure S44.** HSQC spectrum of **1** ( $^1\text{H}$ : 400 MHz,  $^{13}\text{C}$ : 100 MHz, DMSO- $d_6$ )

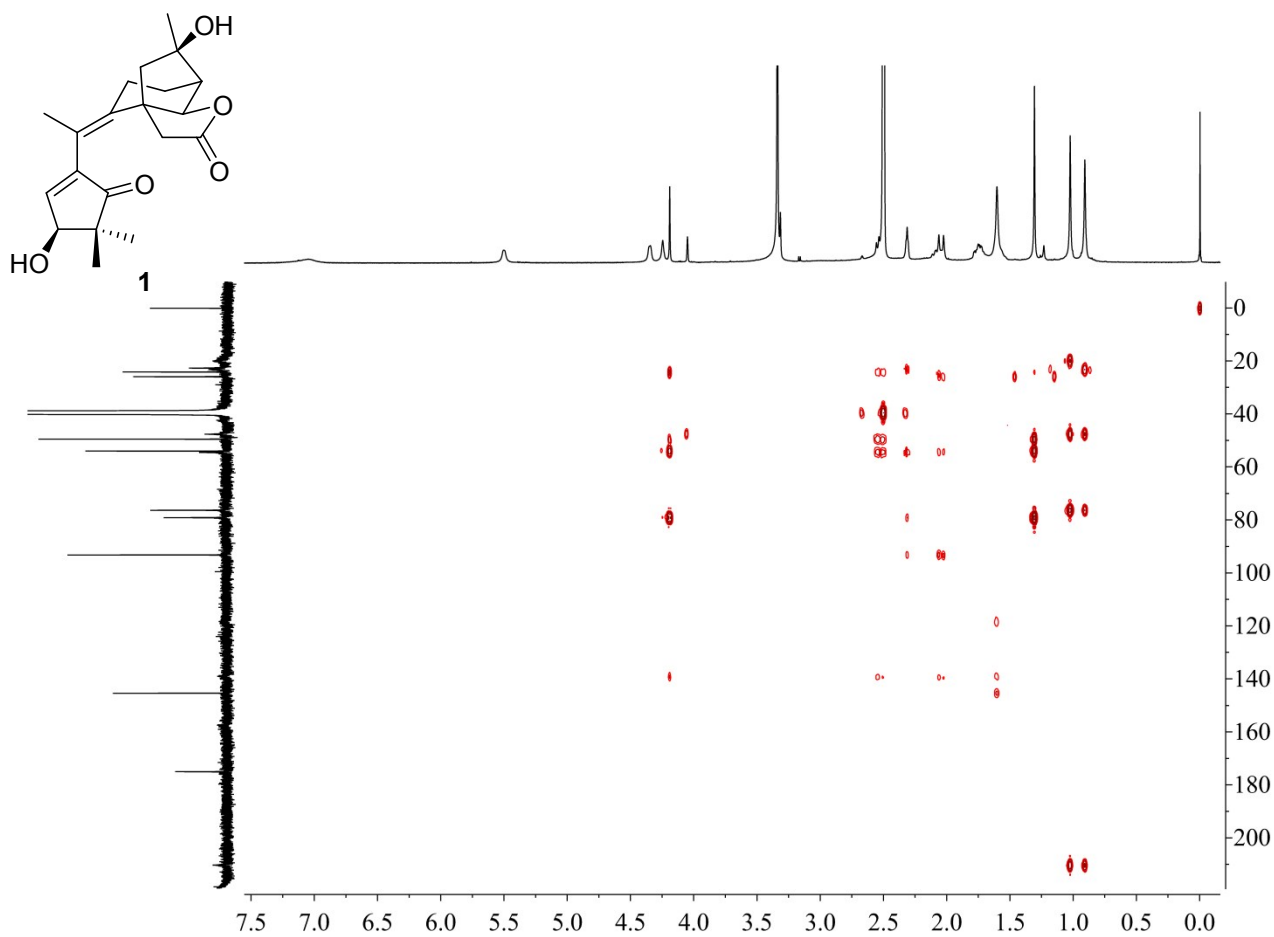

**Figure S45.** HMBC spectrum of **1** ( $^1\text{H}$ : 400 MHz,  $^{13}\text{C}$ : 100 MHz,  $\text{DMSO-}d_6$ )

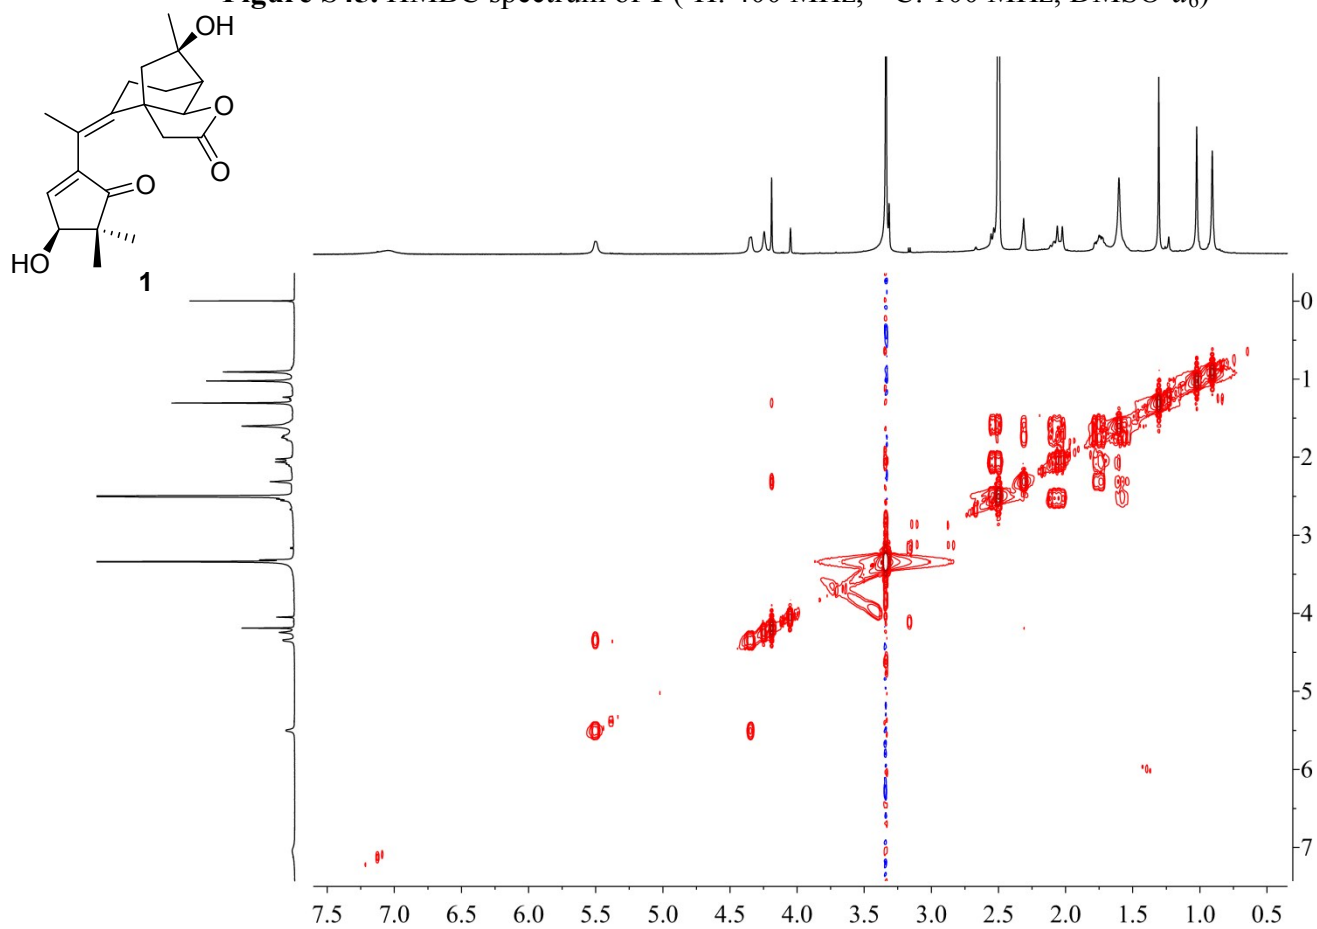

**Figure S46.**  $^1\text{H}$ - $^1\text{H}$  COSY spectrum of **1** (100 MHz,  $\text{DMSO-}d_6$ )



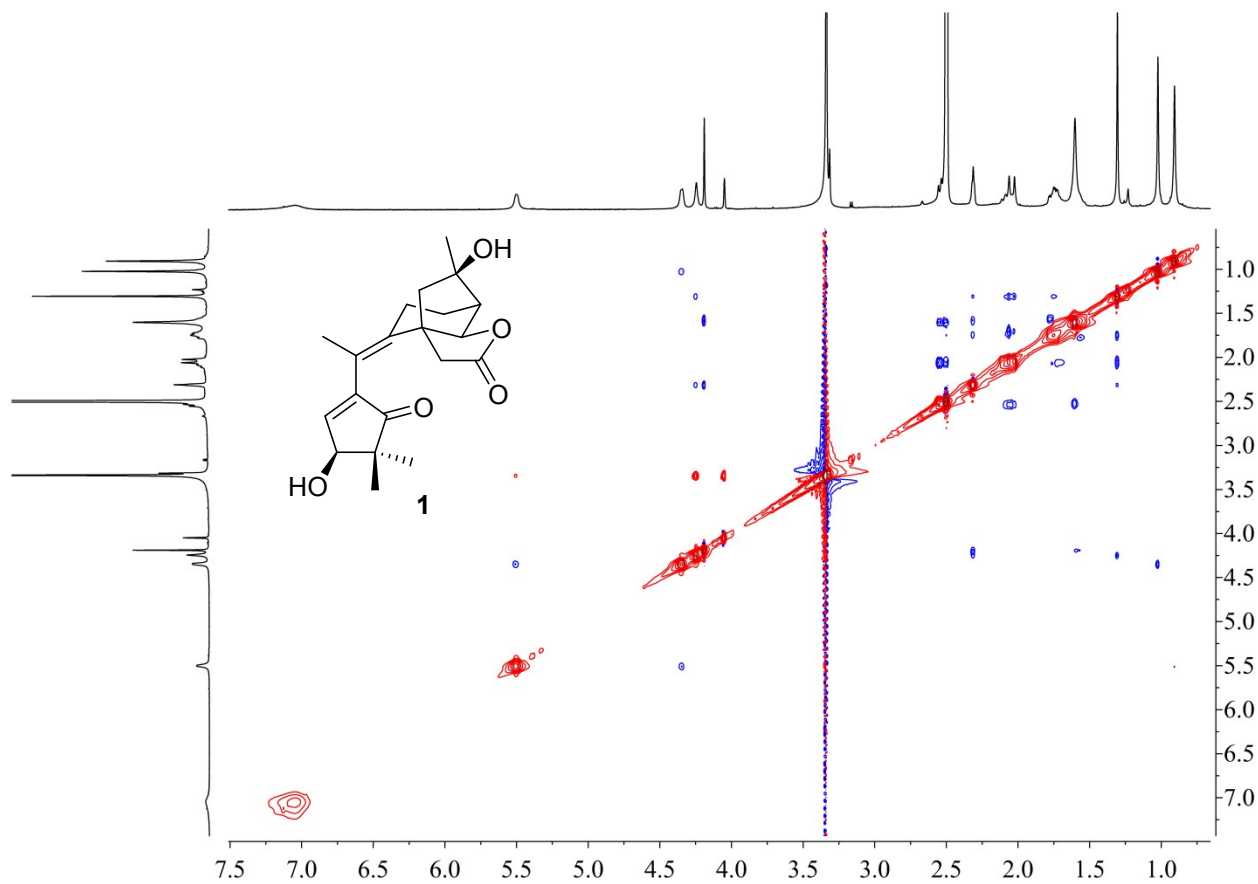

**Figure S47.** NOESY spectrum of **1** (100 MHz, DMSO- $d_6$ )

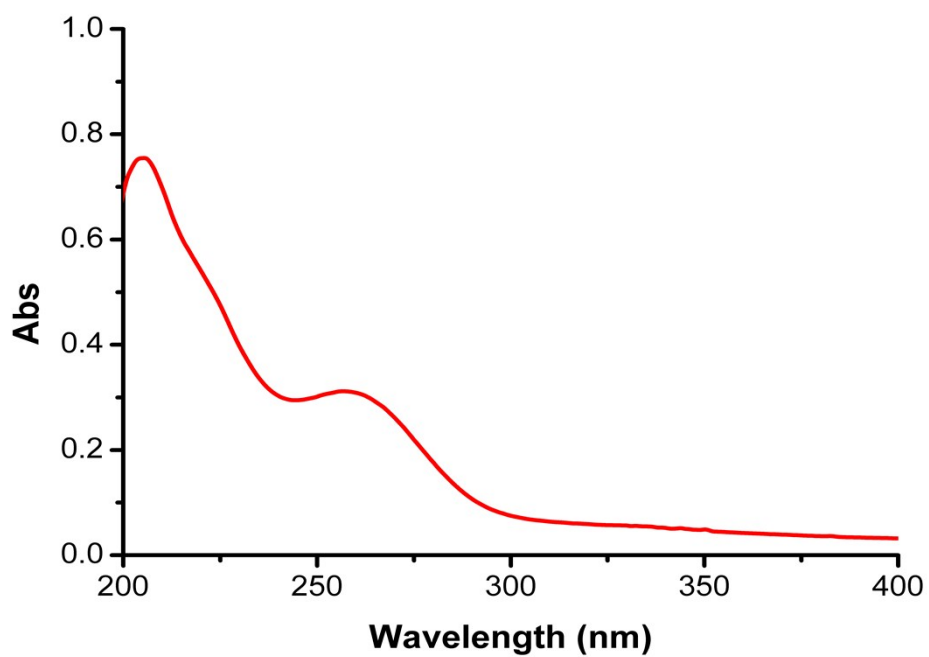

**Figure S48.** The UV spectrum of **2**.

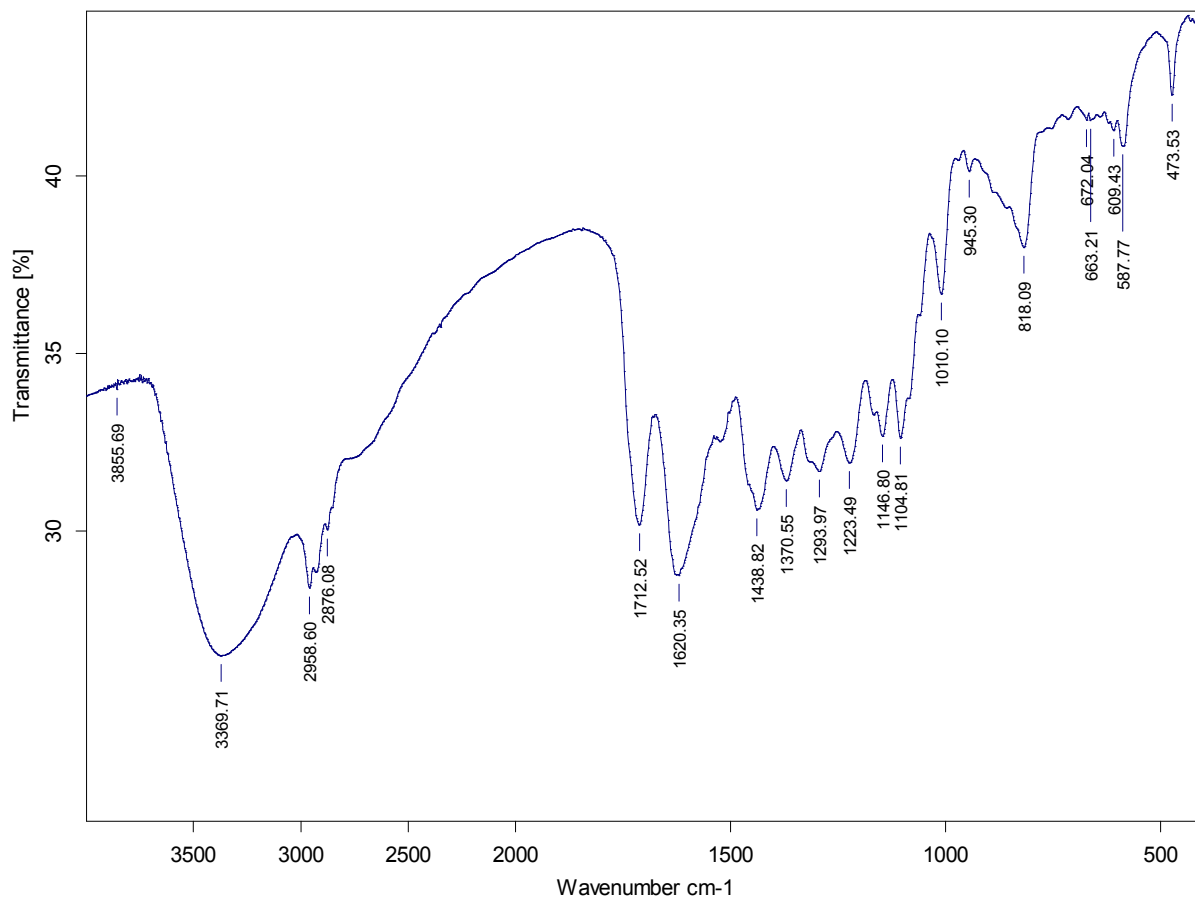

**Figure S49.** The IR spectrum of **2**

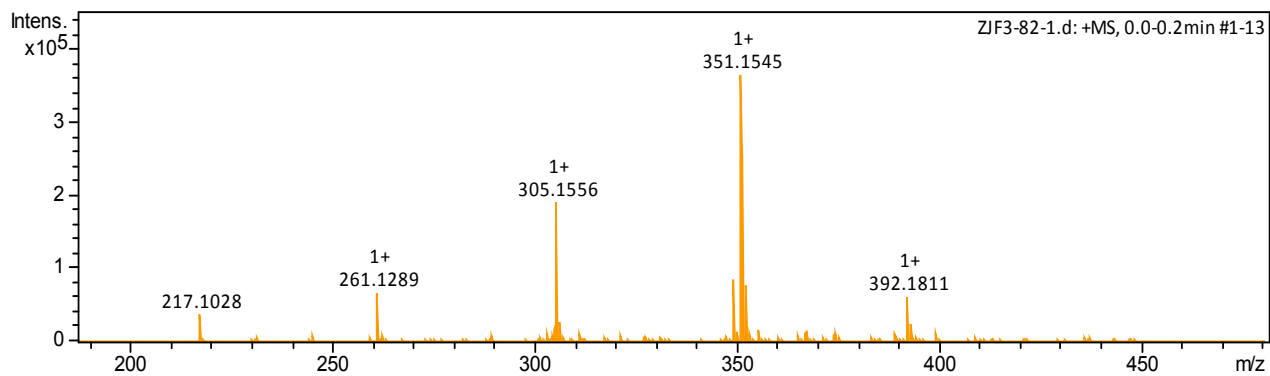

**Figure S50.** The HRESIMS spectrum of **2**

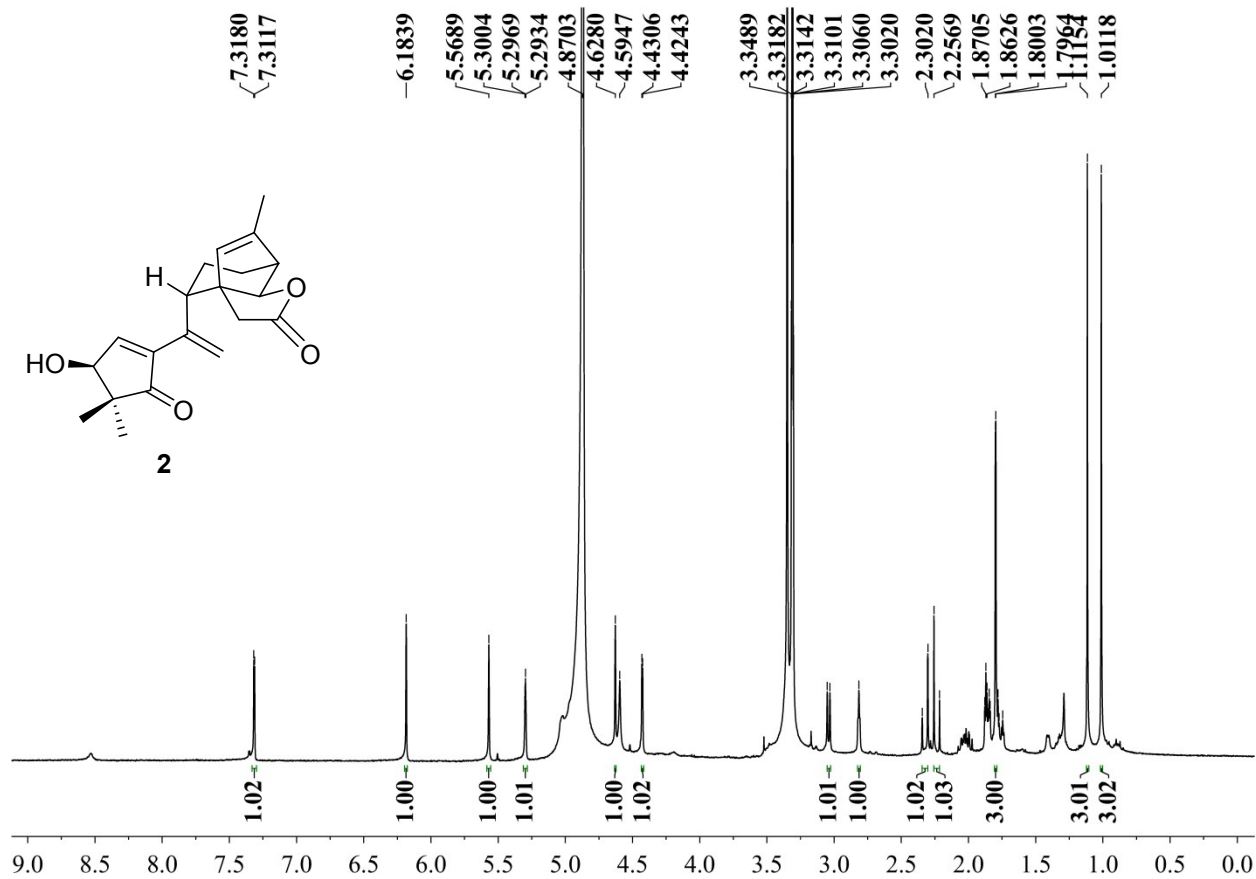

Figure S51.  $^1\text{H}$  NMR spectrum of **2** (400 MHz, methanol- $d_4$ )

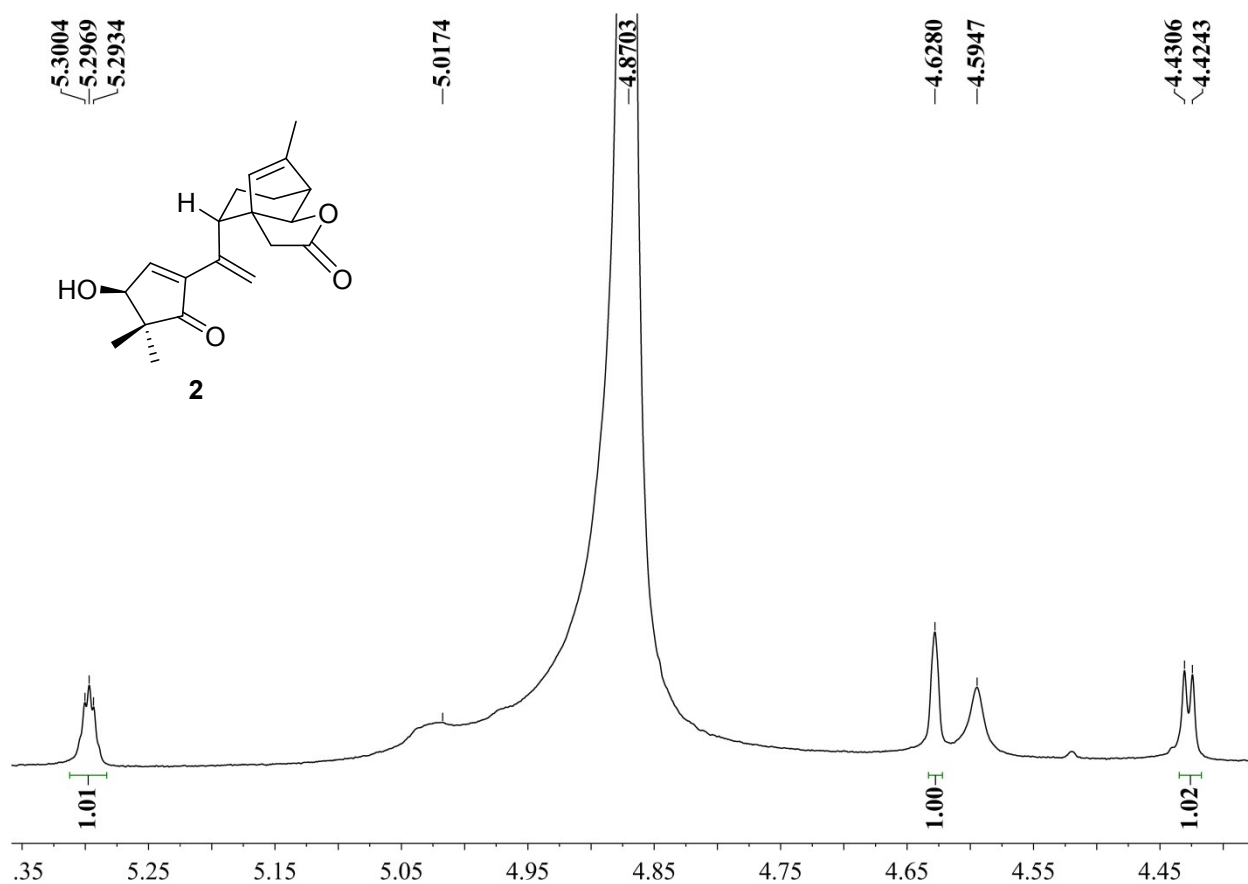

Figure S52.  $^1\text{H}$  NMR spectrum of **2** (400 MHz, methanol- $d_4$ , amplified)

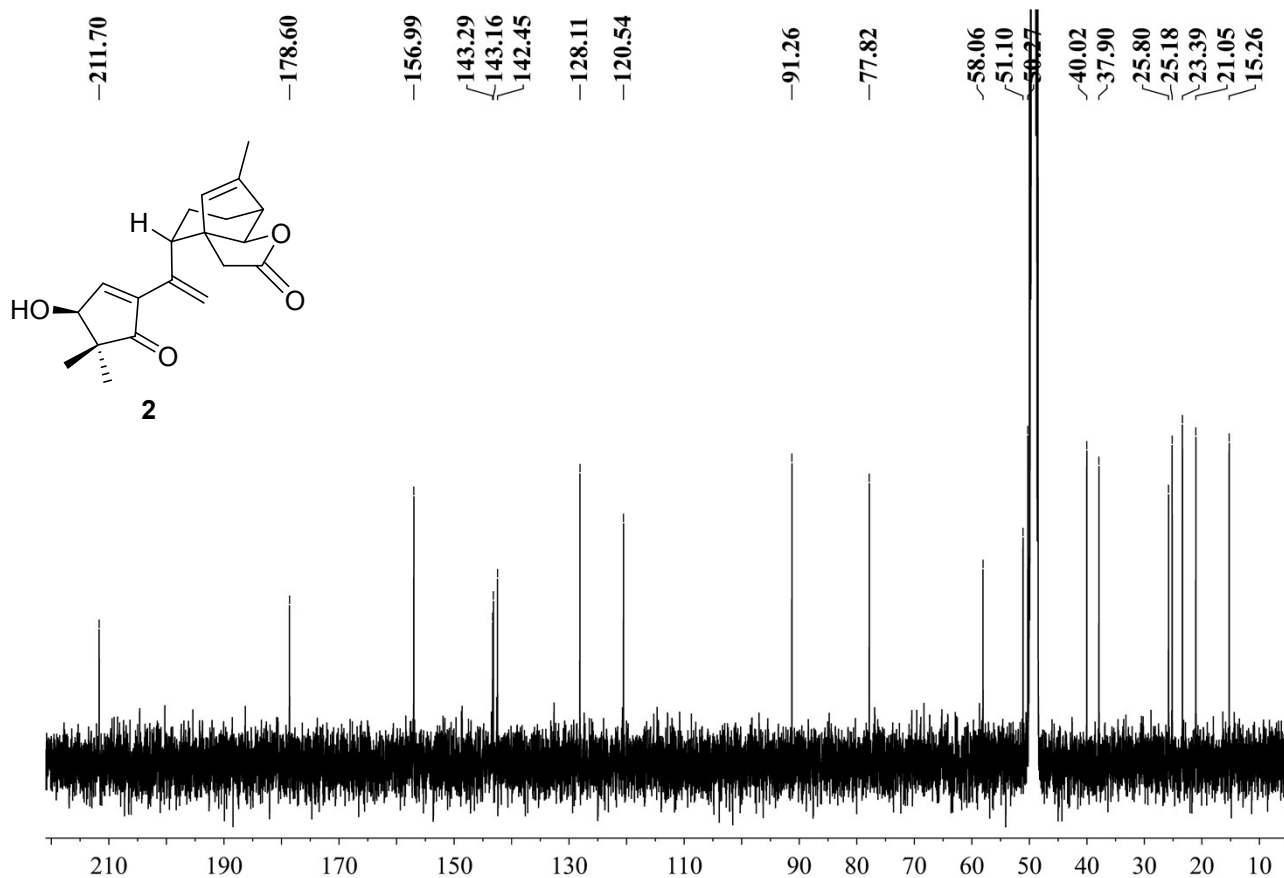

Figure S53.  $^{13}\text{C}$  NMR spectrum of **2** (100 MHz, methanol- $d_4$ )

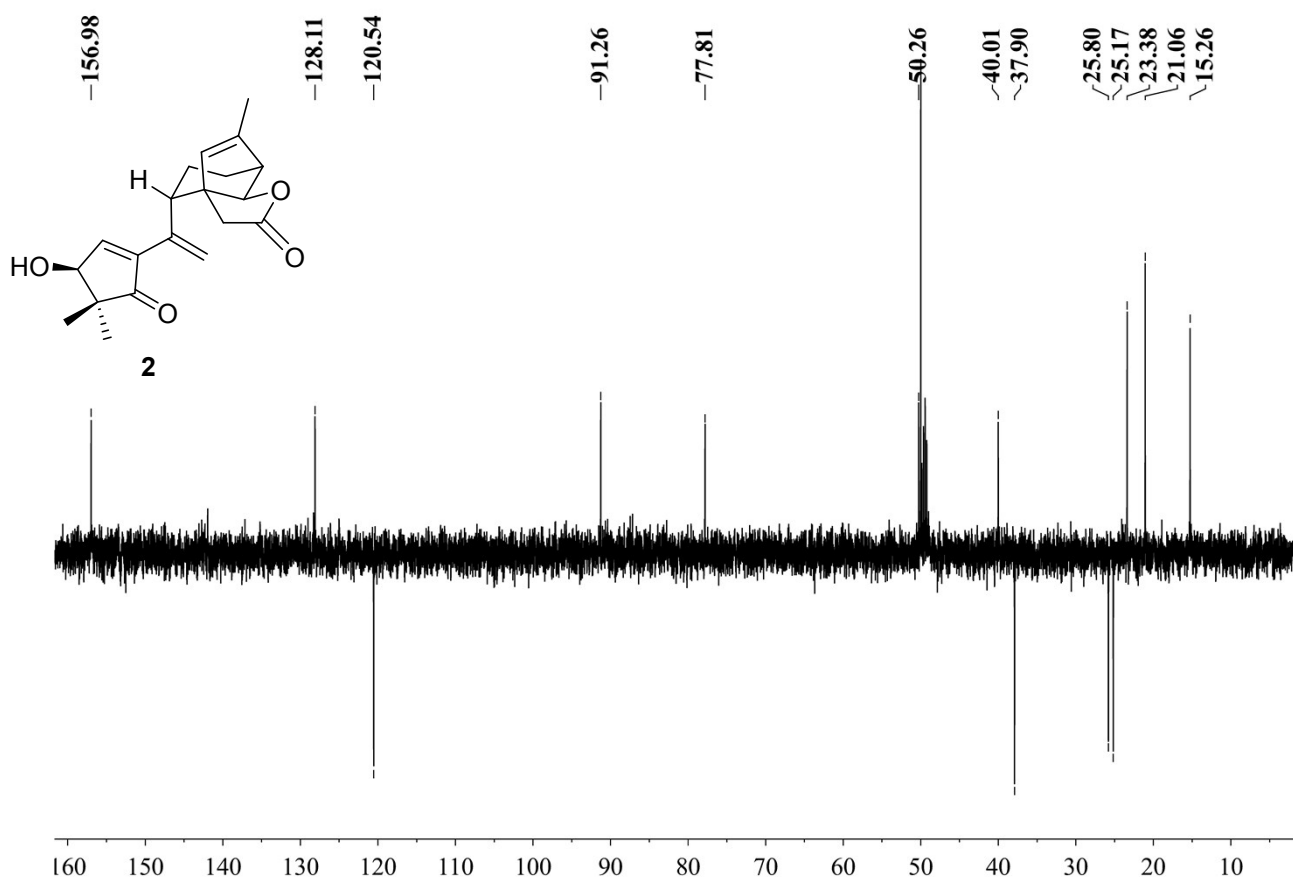

Figure S54. DEPT spectrum of **2** (100 MHz, methanol- $d_4$ )

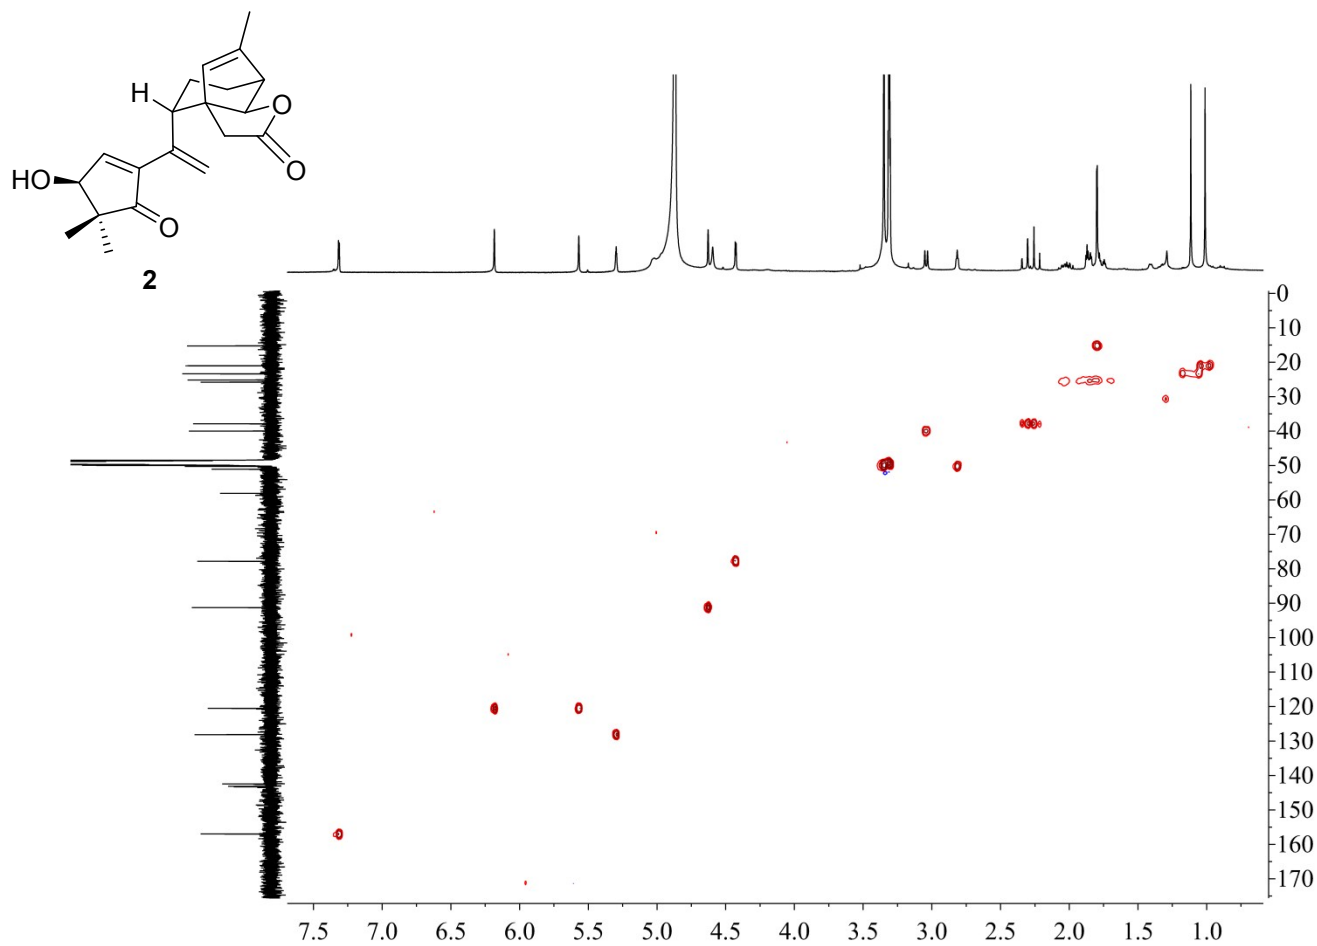

**Figure S55.** HSQC spectrum of **2** ( $^1\text{H}$ : 400 MHz,  $^{13}\text{C}$ : 100 MHz, methanol- $d_4$ )

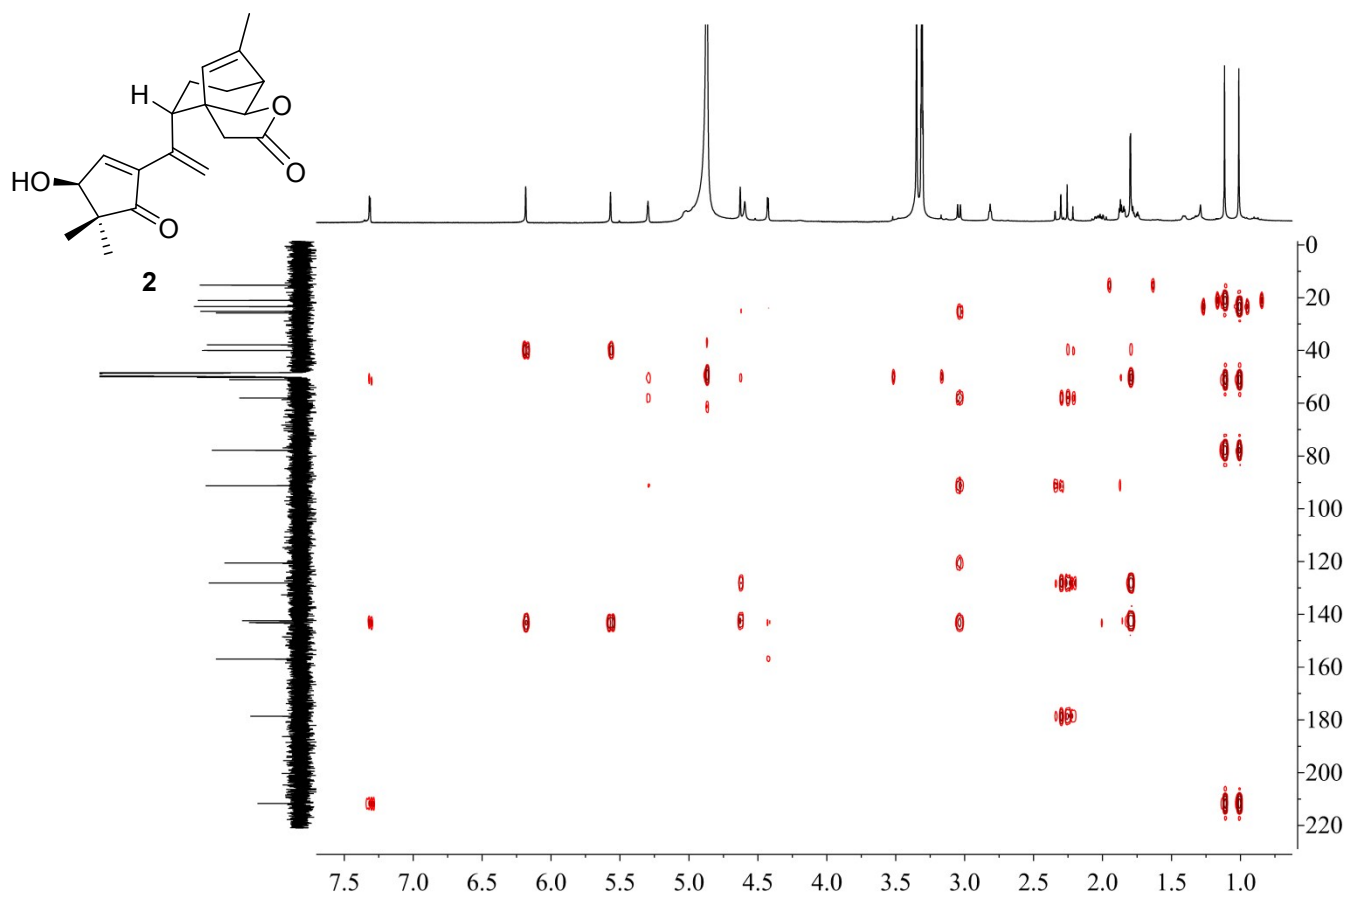

**Figure S56.** HMBC spectrum of **2** ( $^1\text{H}$ : 400 MHz,  $^{13}\text{C}$ : 100 MHz, methanol- $d_4$ )

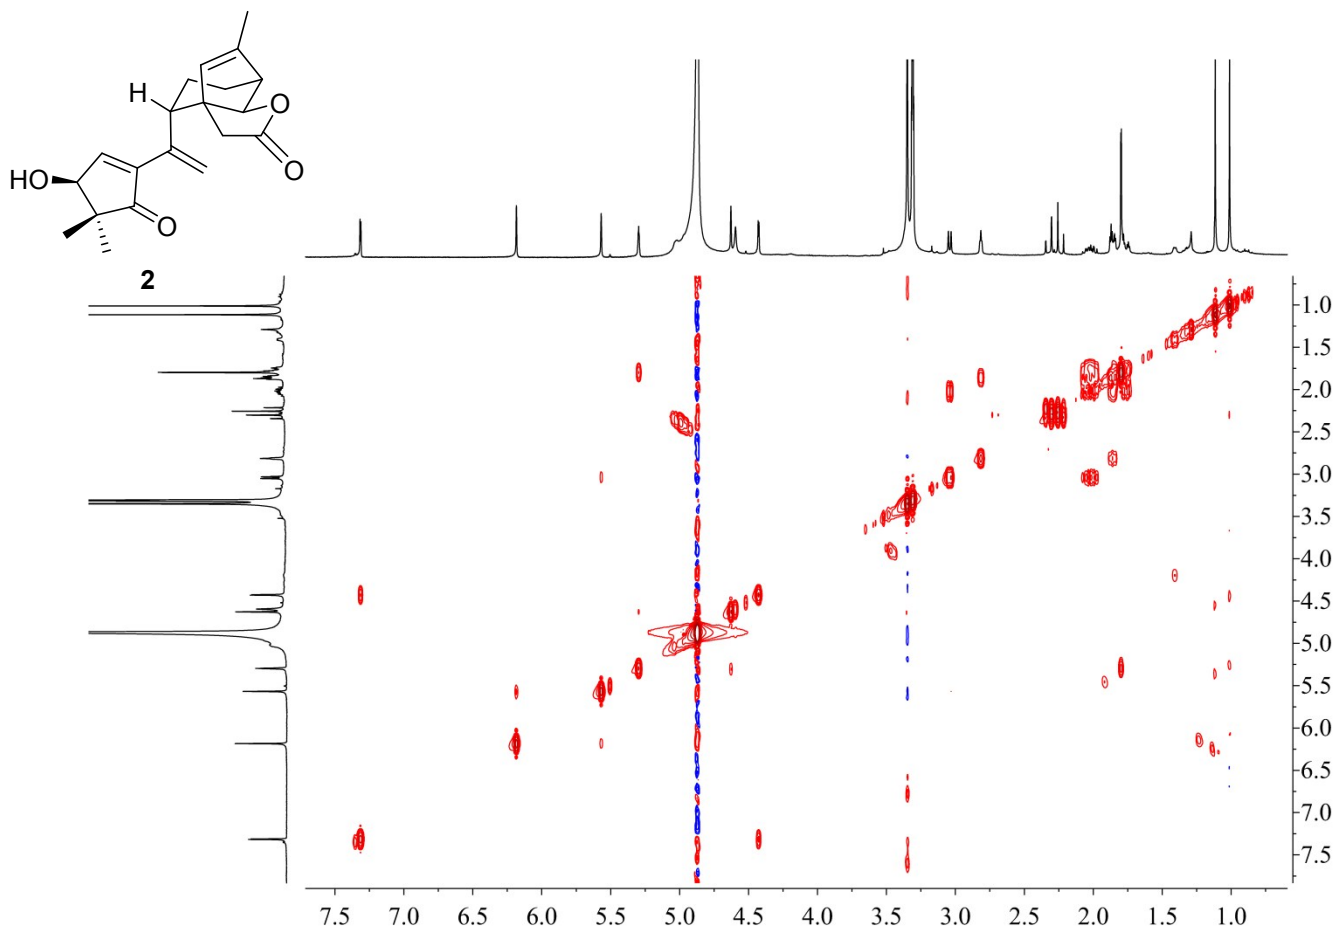

Figure S57.  $^1\text{H}$ - $^1\text{H}$  COSY spectrum of **2** (100 MHz, methanol- $d_4$ )

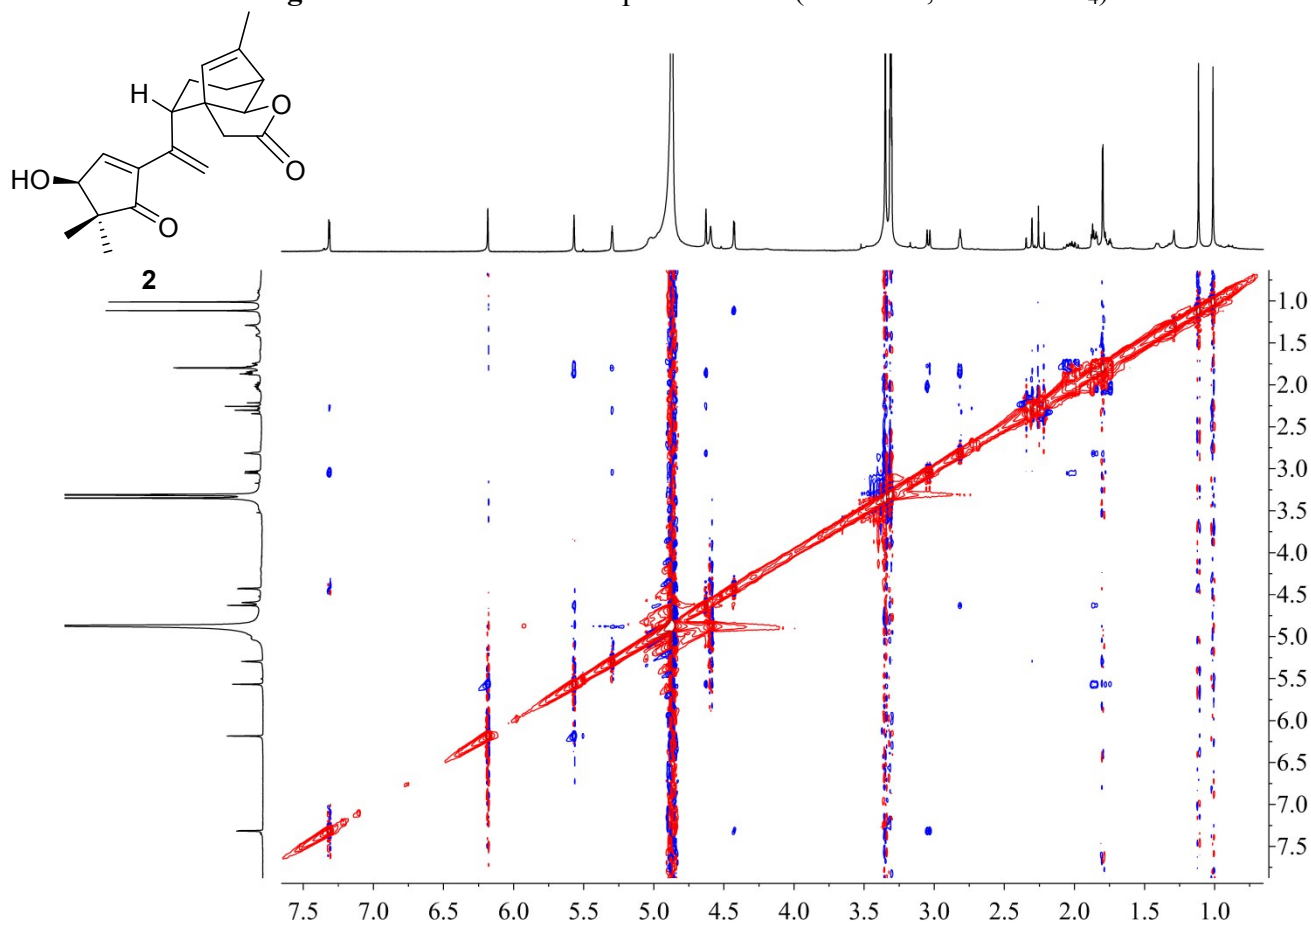

Figure S58. NOESY spectrum of **2** (100 MHz, methanol- $d_4$ )

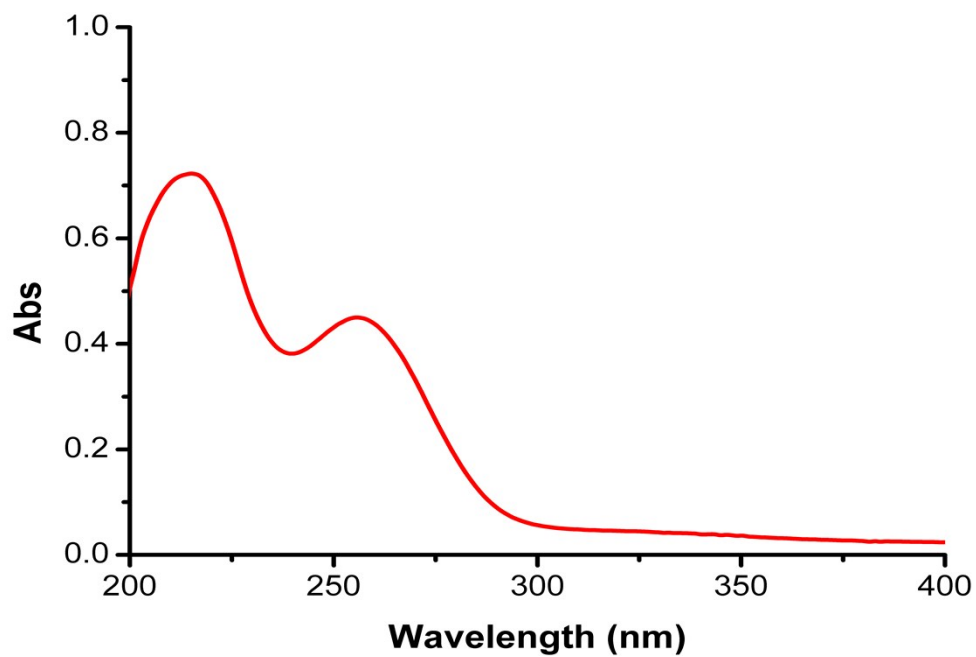

**Figure S59.** The UV spectrum of **3**.

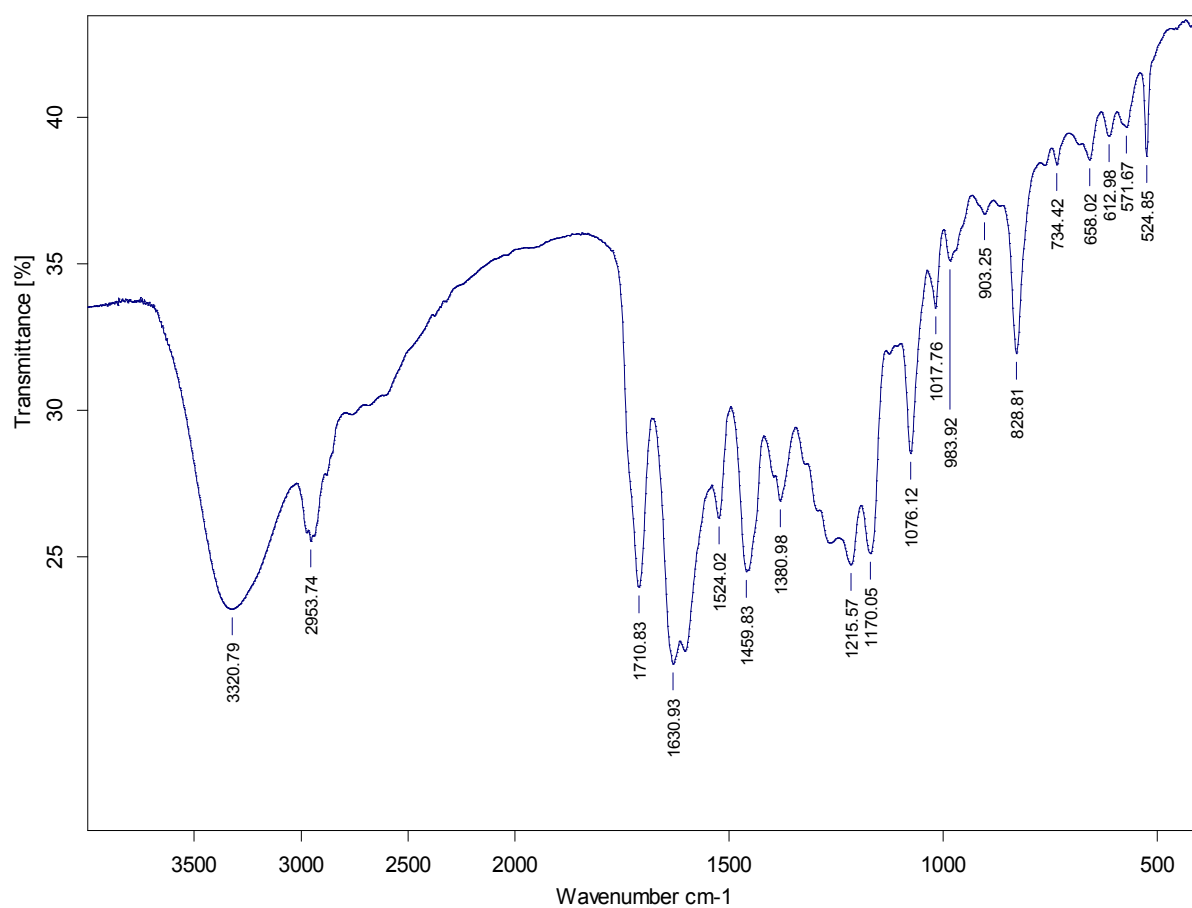

**Figure S60.** The IR spectrum of **3**

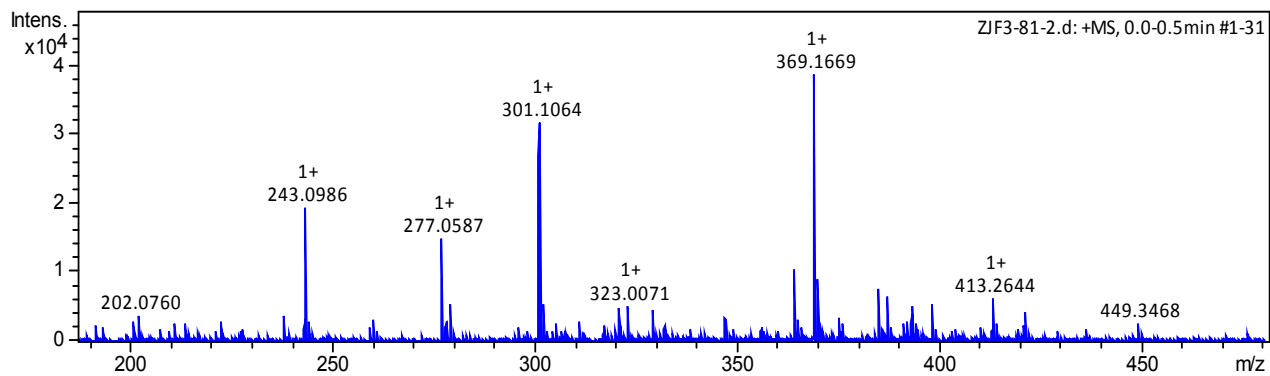

Figure S61. The HRESIMS spectrum of **3**

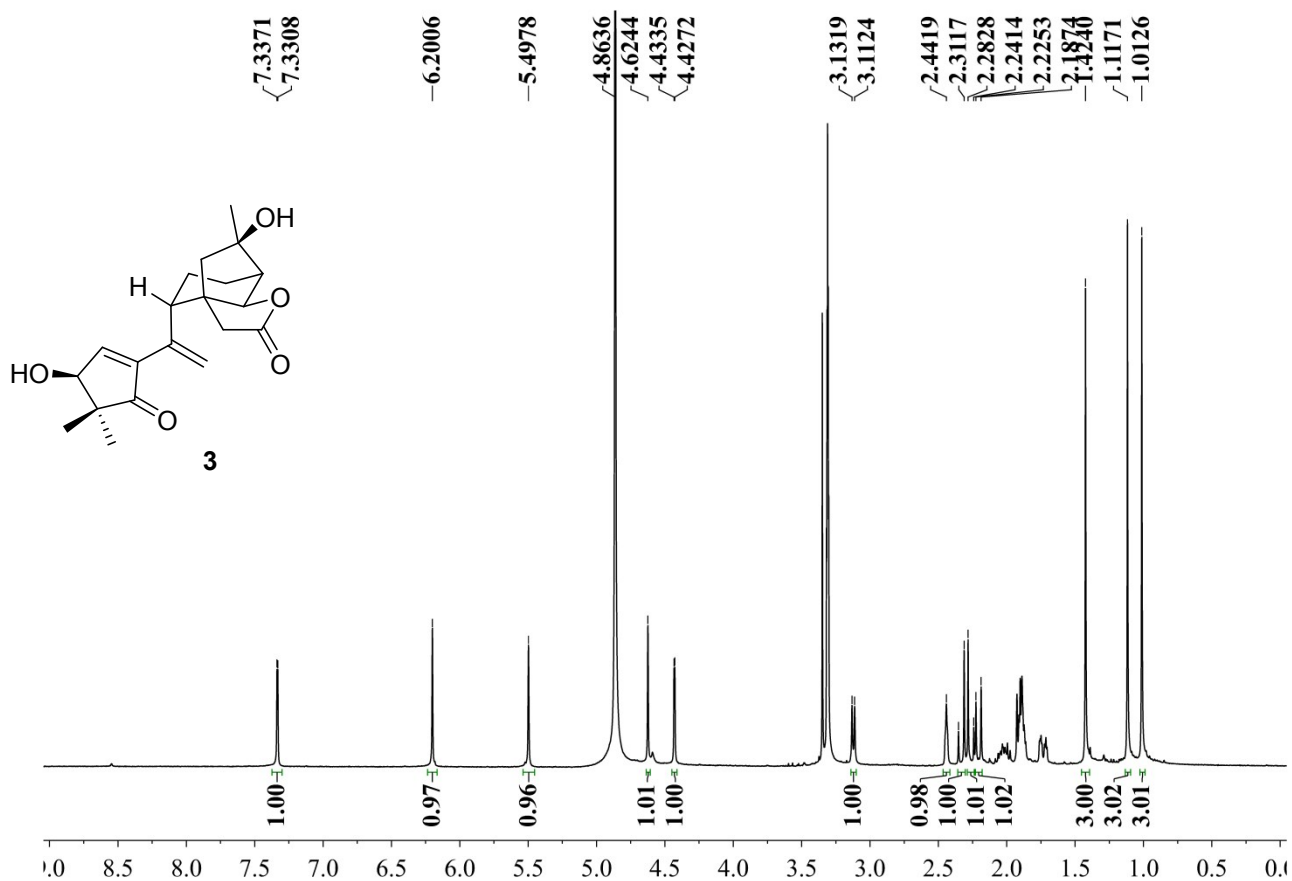

Figure S62. <sup>1</sup>H NMR spectrum of **3** (400 MHz, methanol-*d*<sub>4</sub>)



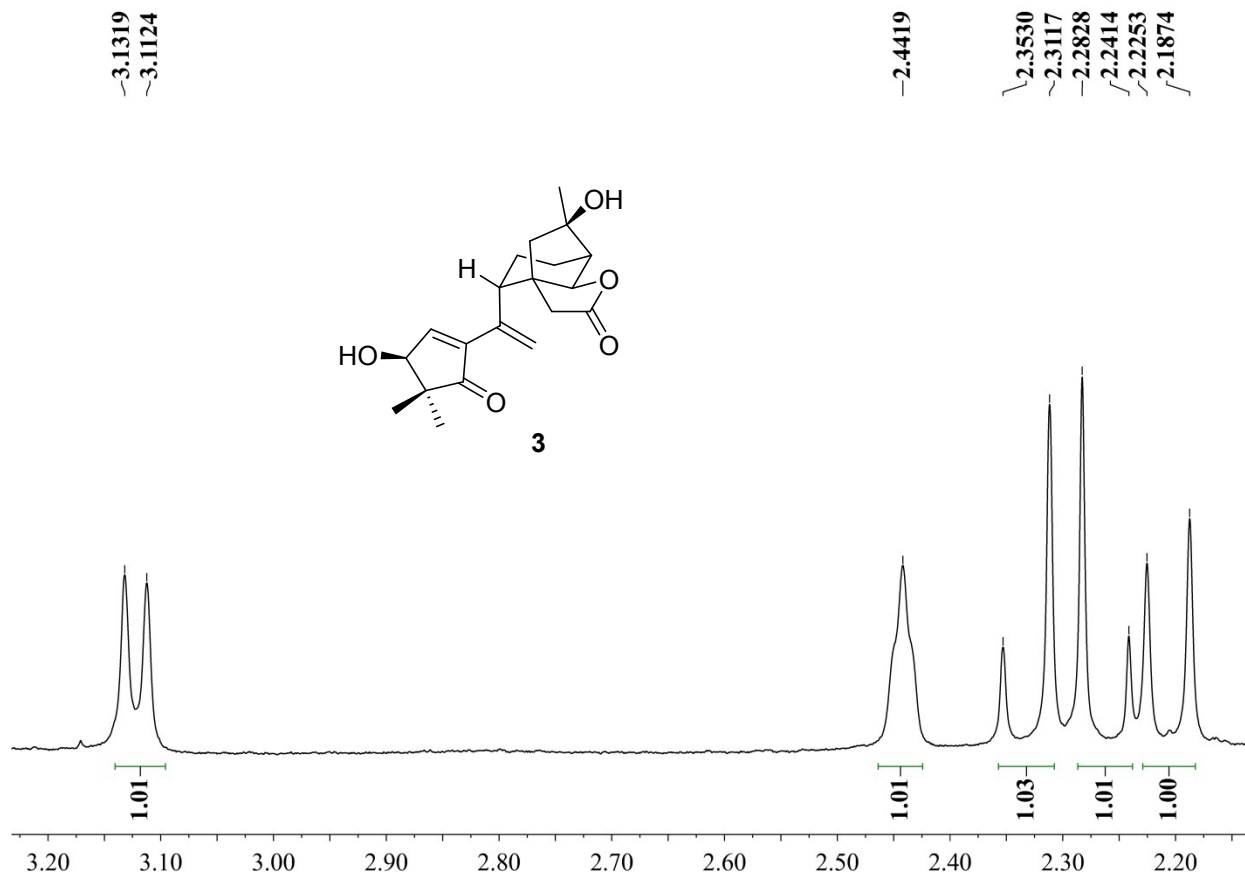

**Figure S63.** <sup>1</sup>H NMR spectrum of **3** (400 MHz, methanol-*d*<sub>4</sub>, amplified)

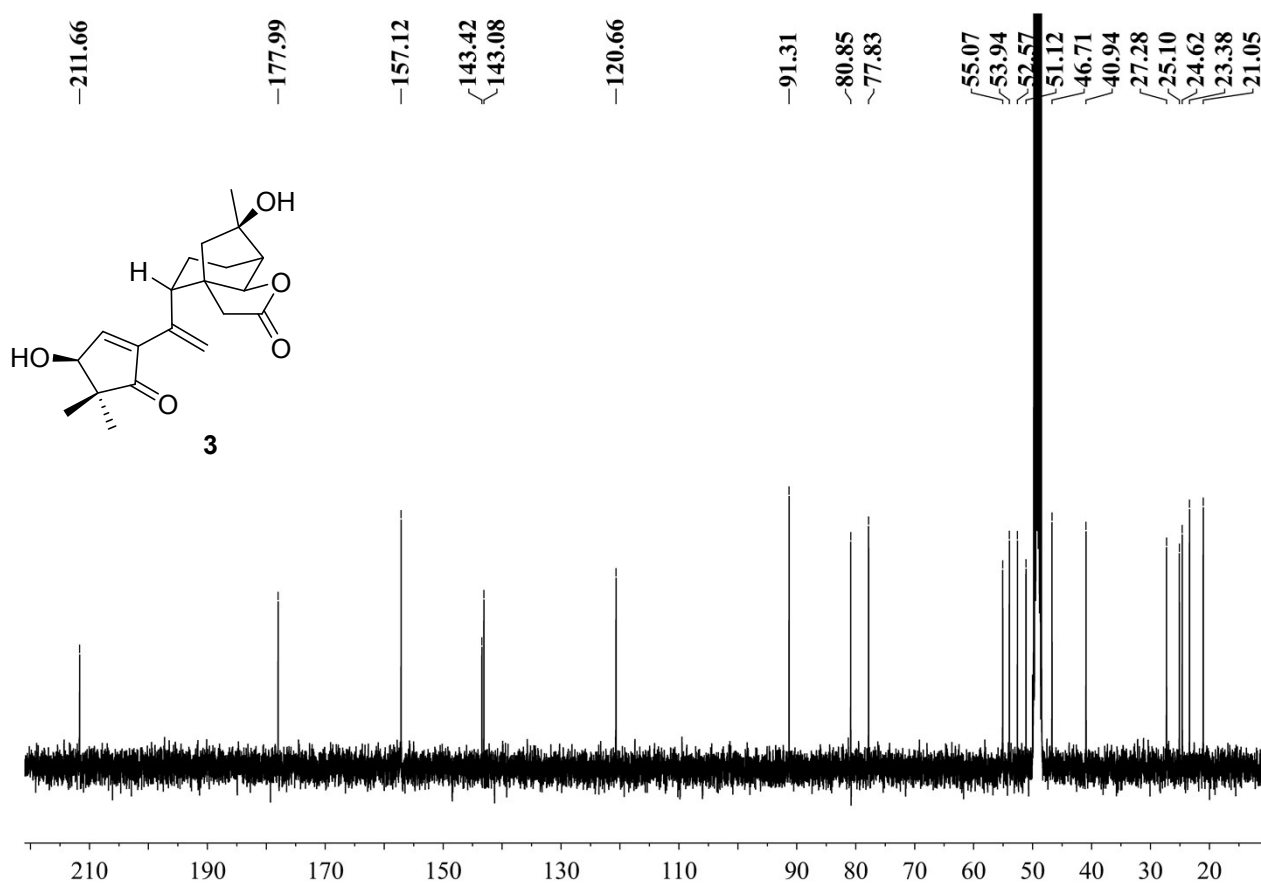

**Figure S64.** <sup>13</sup>C NMR spectrum of **3** (100 MHz, methanol-*d*<sub>4</sub>)

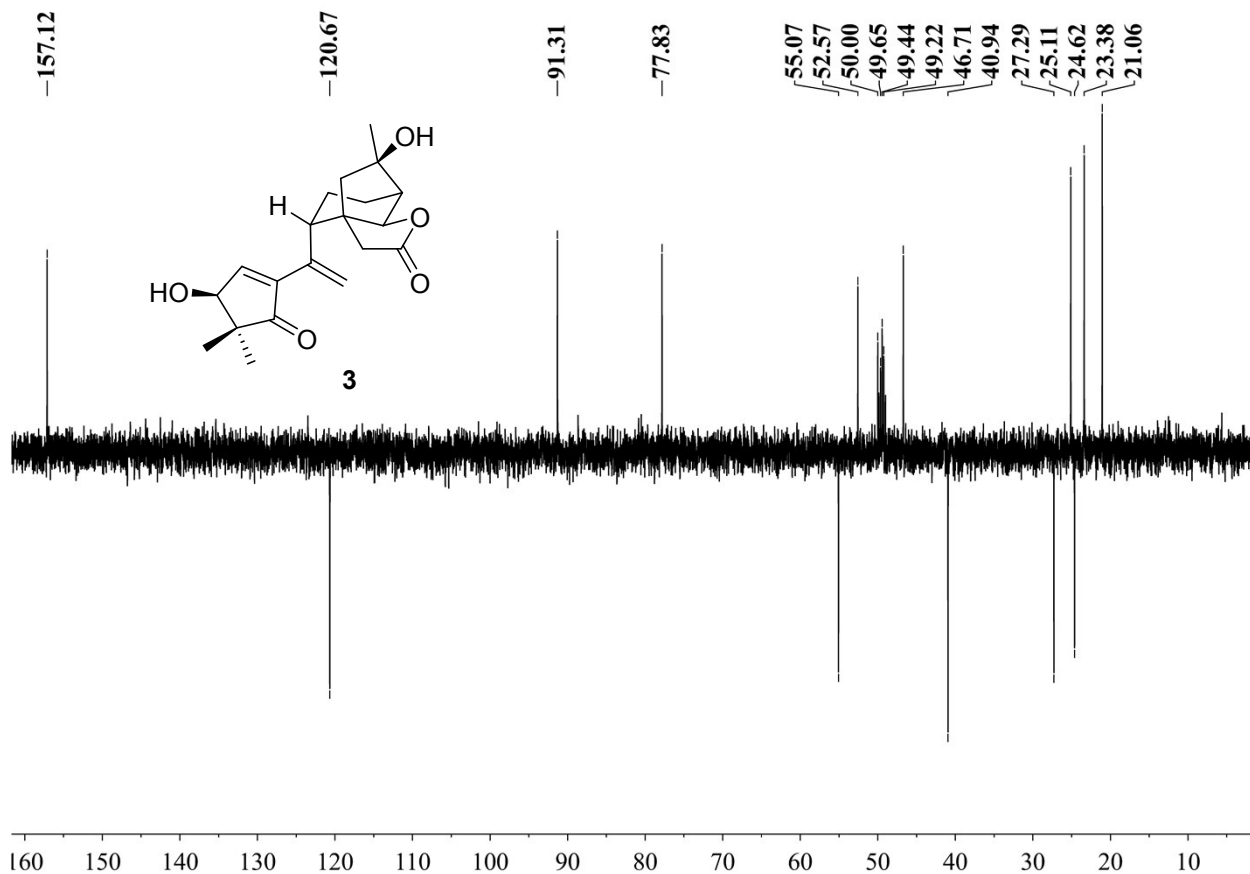

**Figure S65.** DEPT spectrum of **3** (100 MHz, methanol- $d_4$ )

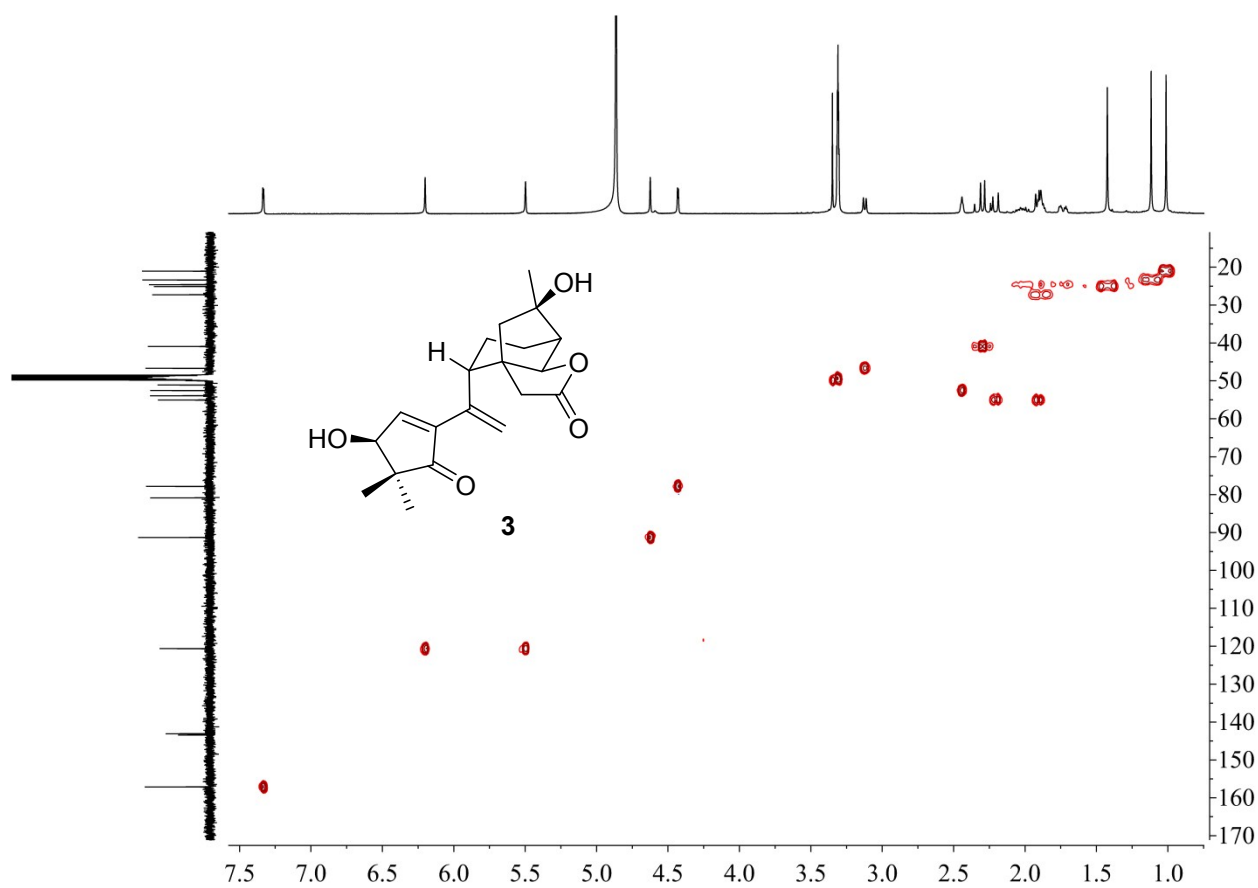

**Figure S66.** HSQC spectrum of **3** ( $^1\text{H}$ : 400 MHz,  $^{13}\text{C}$ : 100 MHz, methanol- $d_4$ )

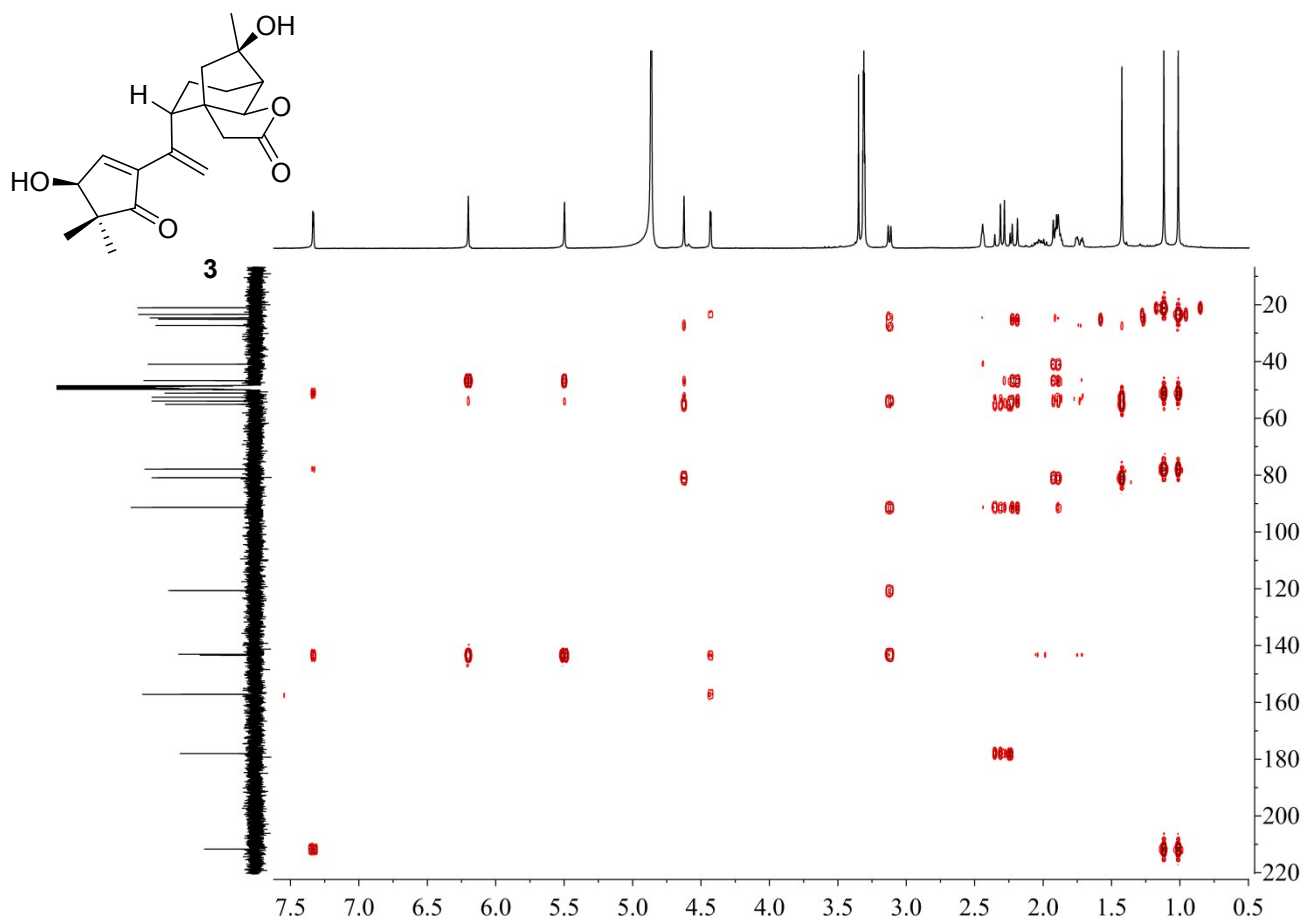

**Figure S67.** HMBC spectrum of **3** ( $^1\text{H}$ : 400 MHz,  $^{13}\text{C}$ : 100 MHz, methanol- $d_4$ )

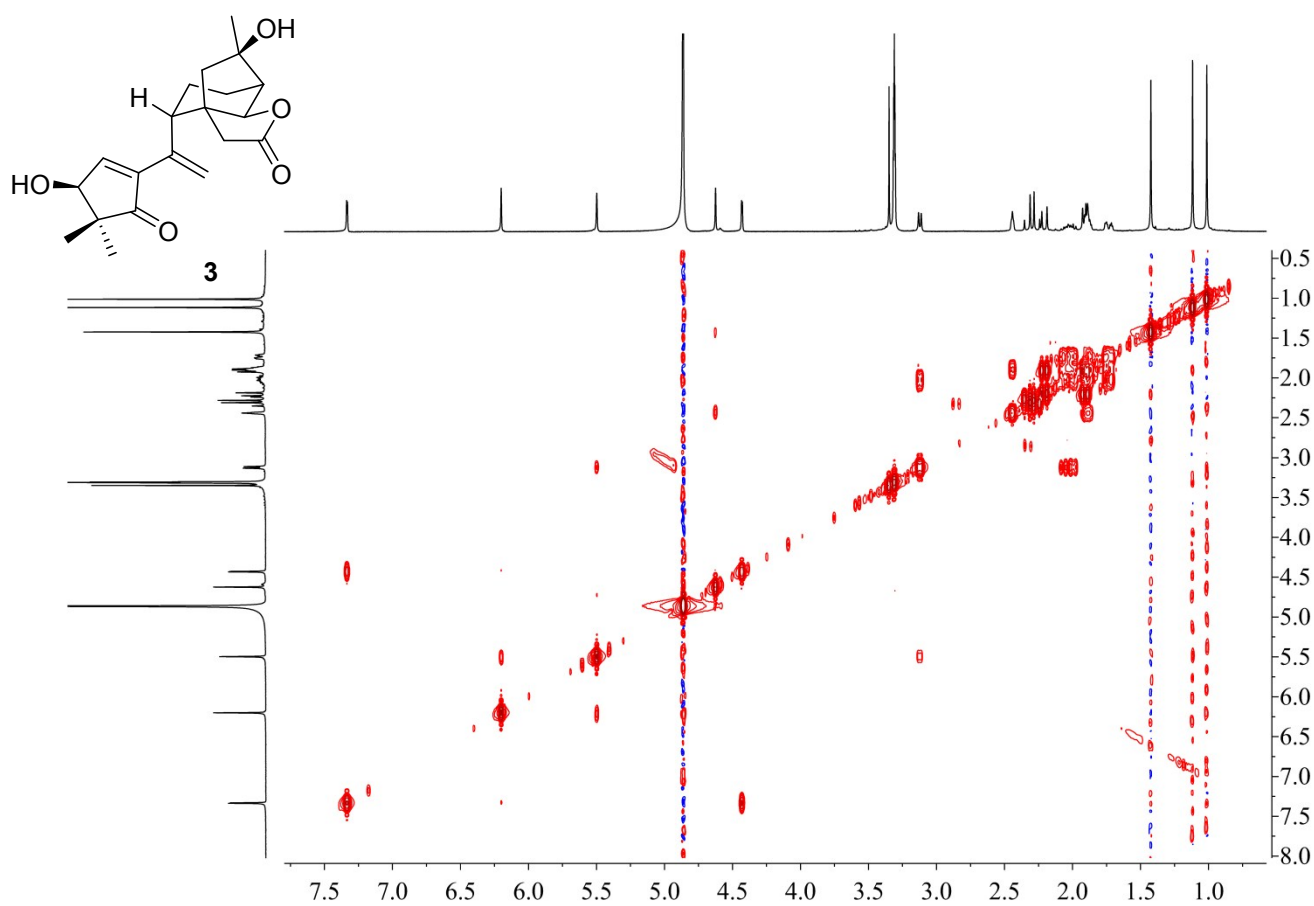

**Figure S68.**  $^1\text{H}$ - $^1\text{H}$  COSY spectrum of **3** (400 MHz, methanol- $d_4$ )

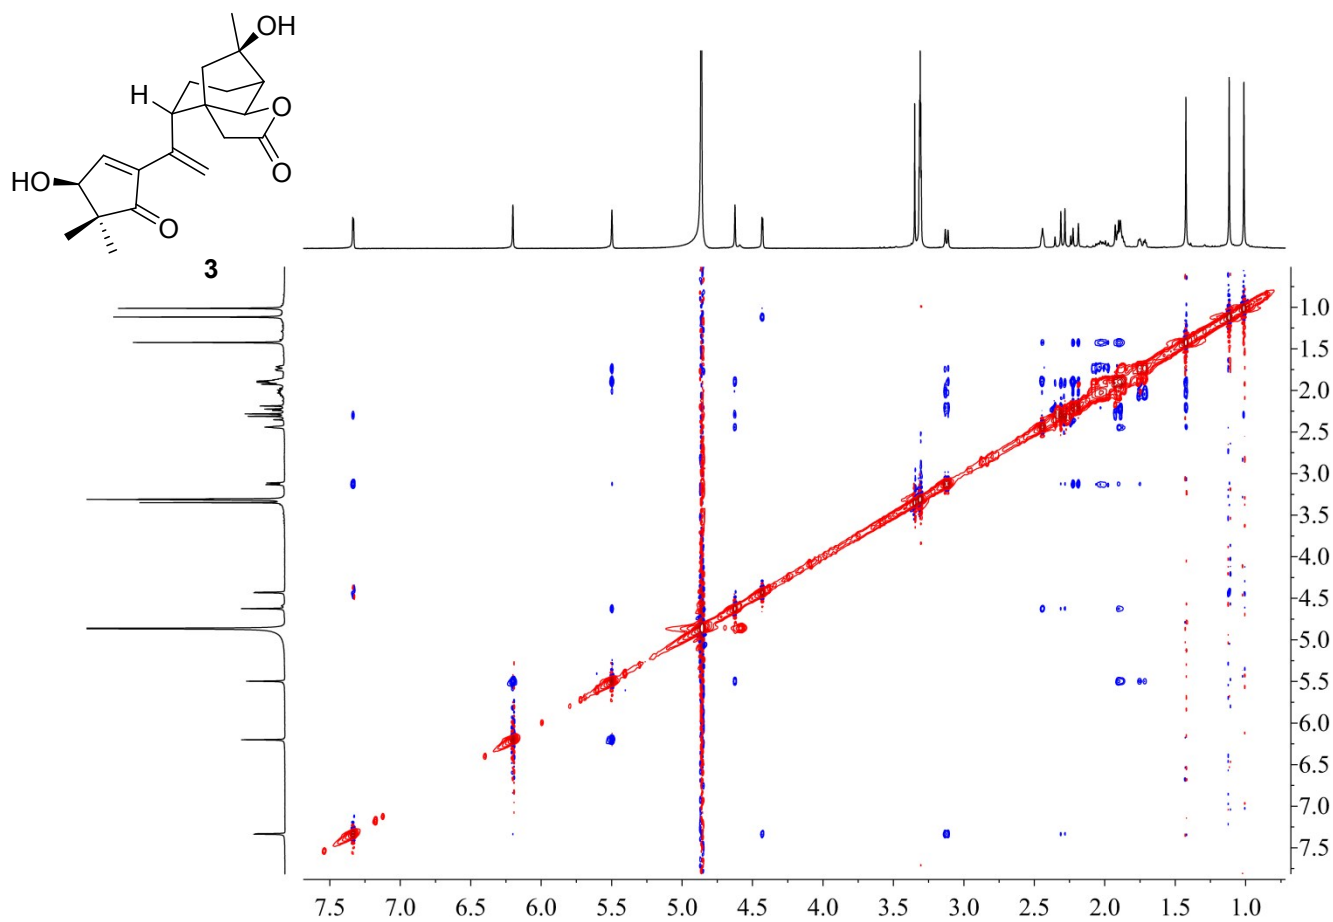

**Figure S69.** NOESY spectrum of **3** (400 MHz, methanol- $d_4$ )

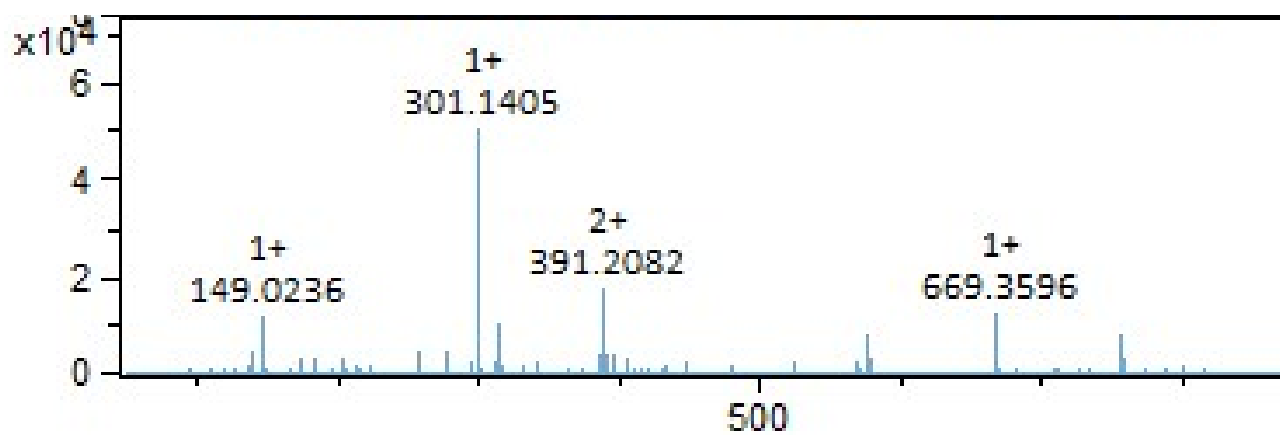

**Figure S70.** The HRESIMS spectrum of **4**

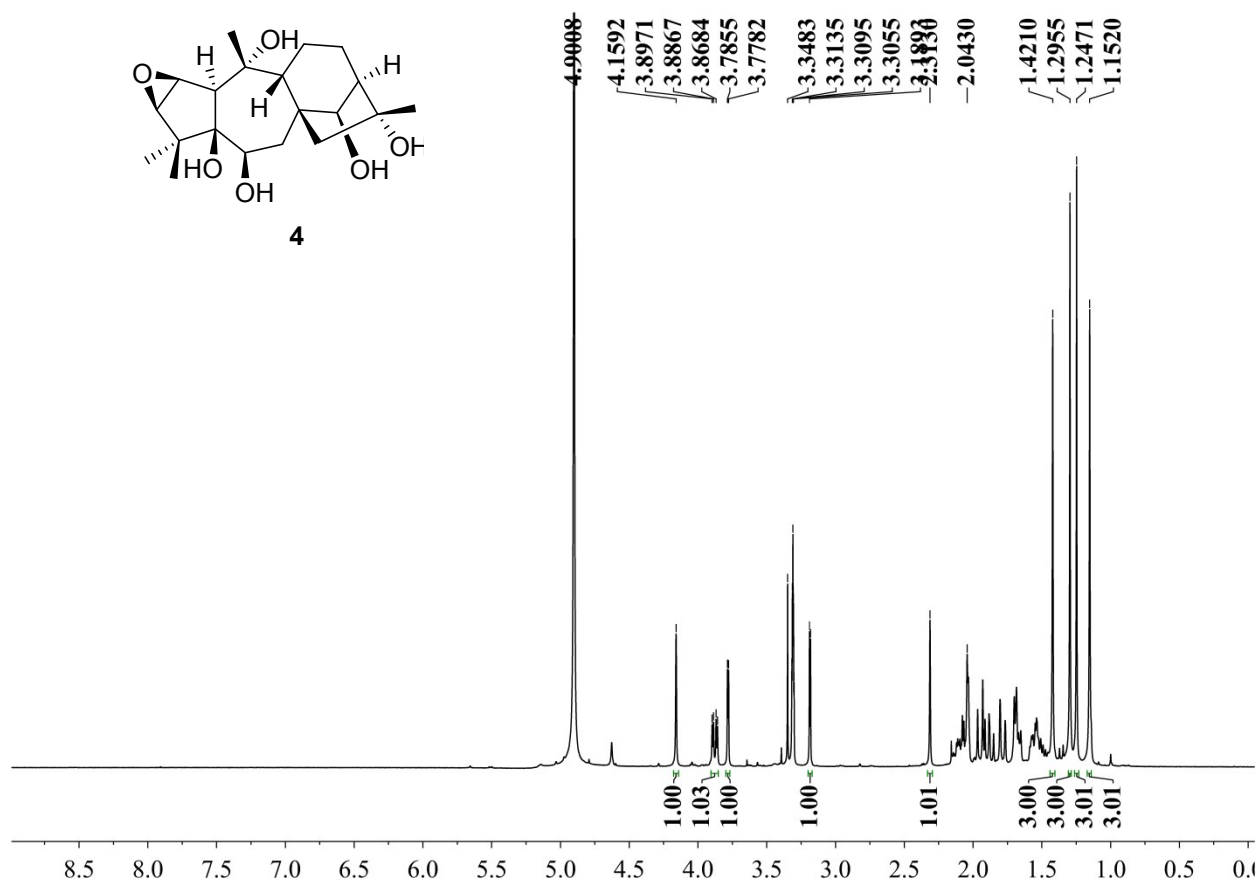

**Figure S71.**  $^1\text{H}$  NMR spectrum of **4** (400 MHz, methanol- $d_4$ )

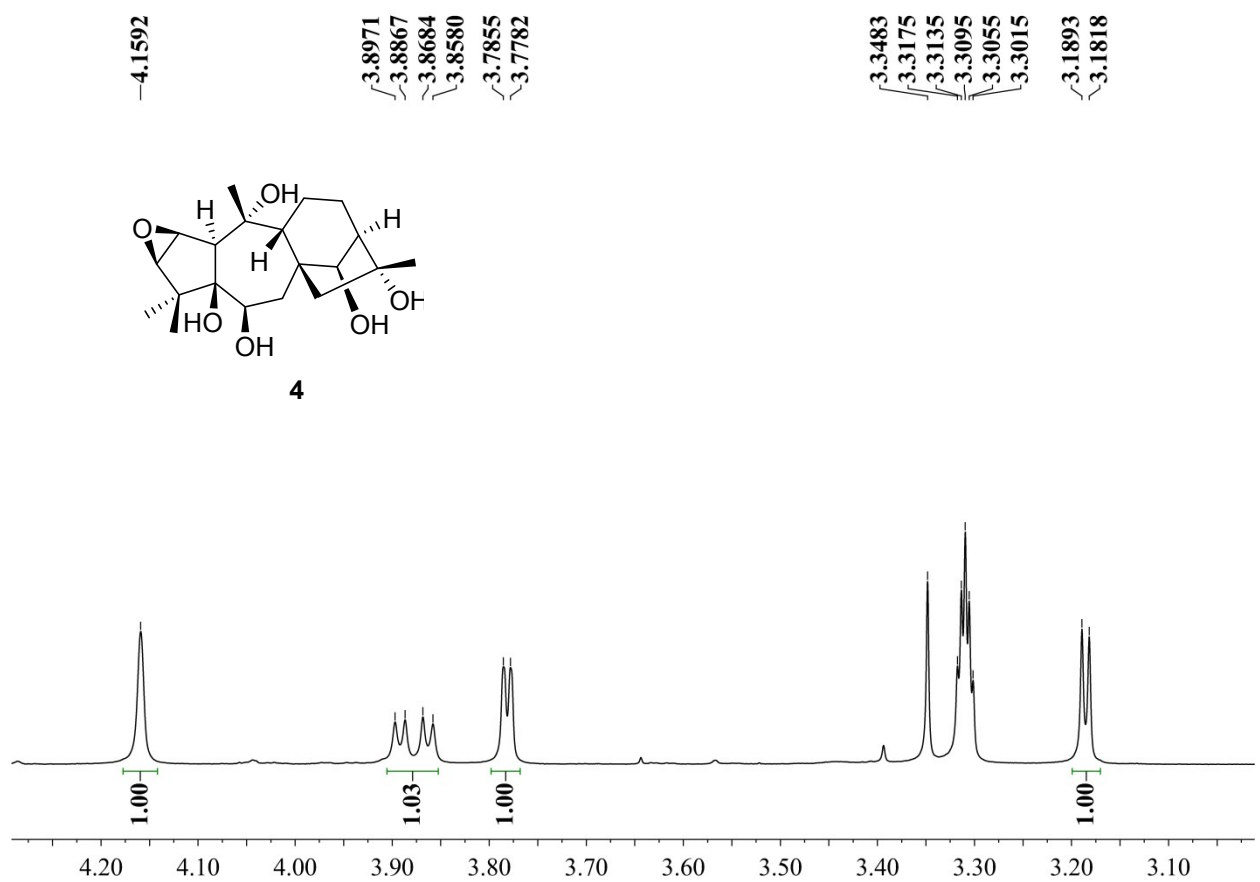

**Figure S72.**  $^1\text{H}$  NMR spectrum of **4** (400 MHz, methanol- $d_4$ , amplified)

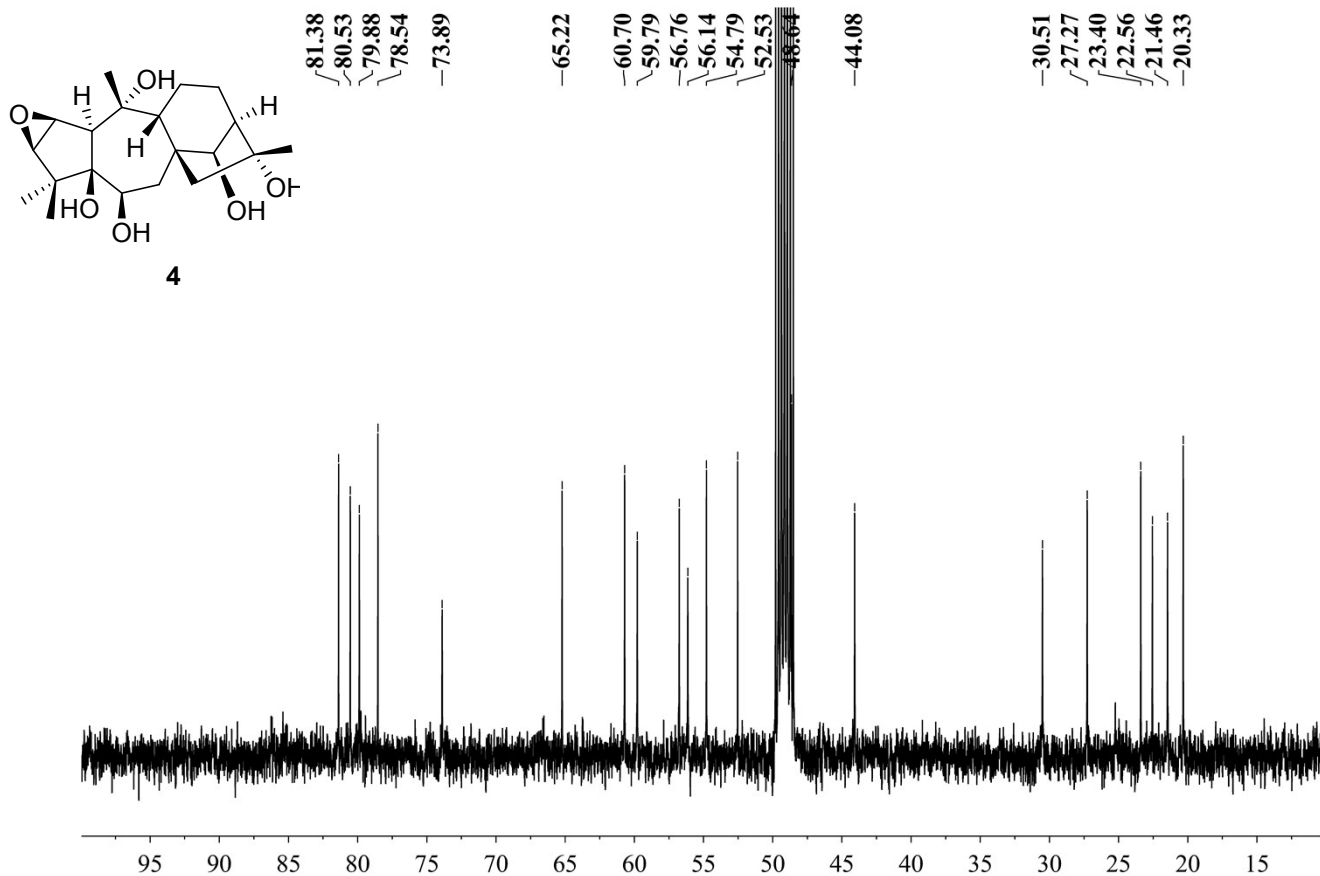

**Figure S73.** <sup>13</sup>C NMR spectrum of **4** (100 MHz, methanol-*d*<sub>4</sub>)

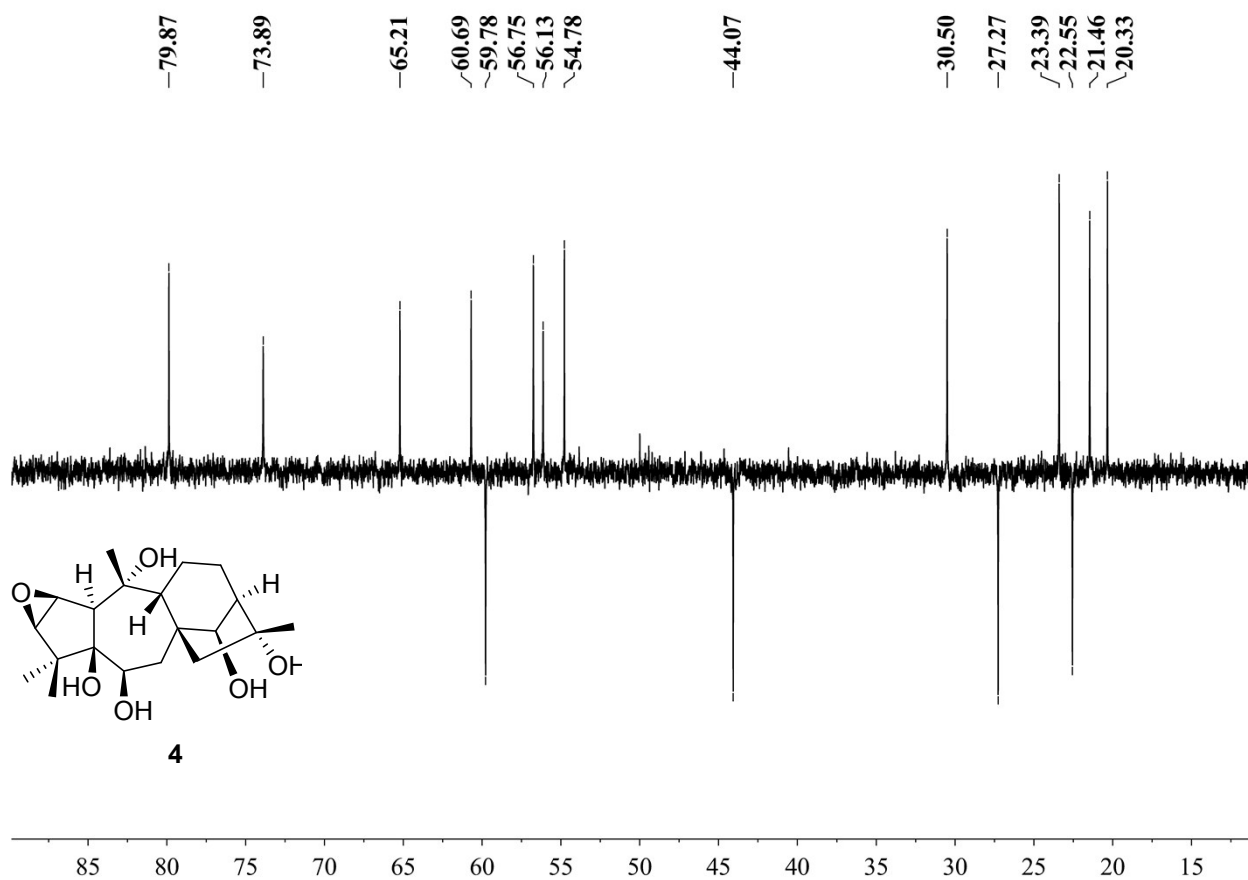

**Figure S74.** DEPT spectrum of **4** (100 MHz, methanol-*d*<sub>4</sub>)

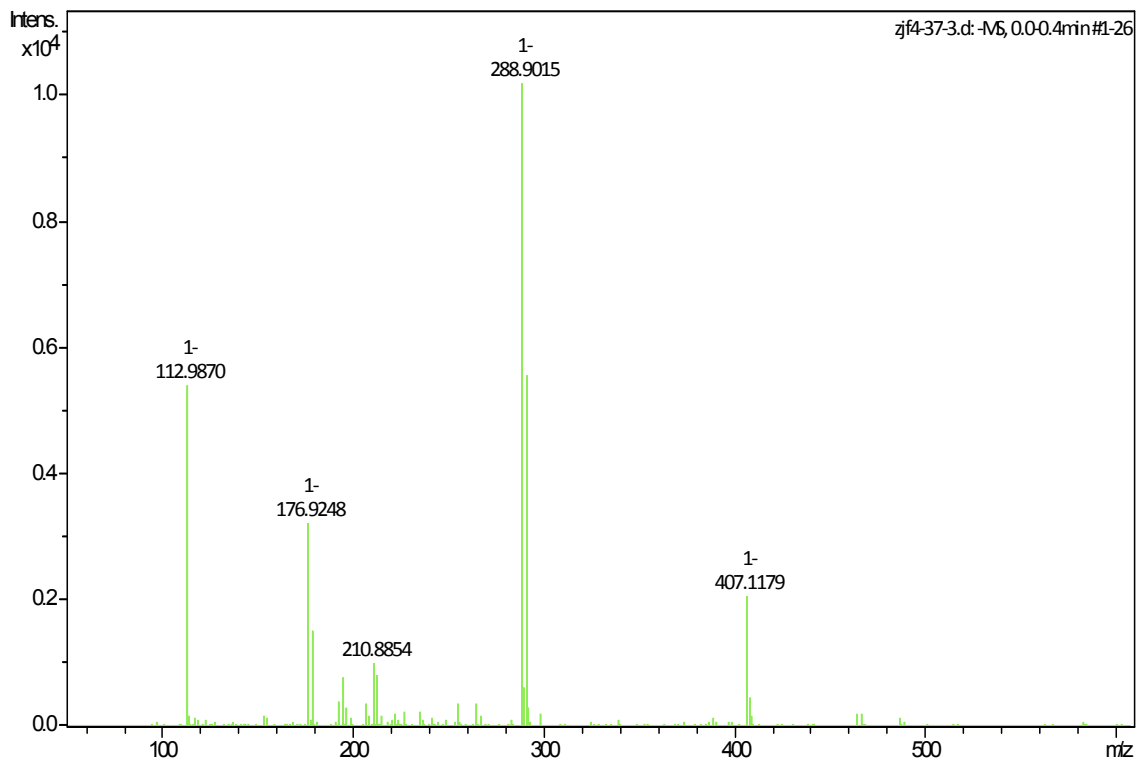

Figure S75. The HRESIMS spectrum of **9**

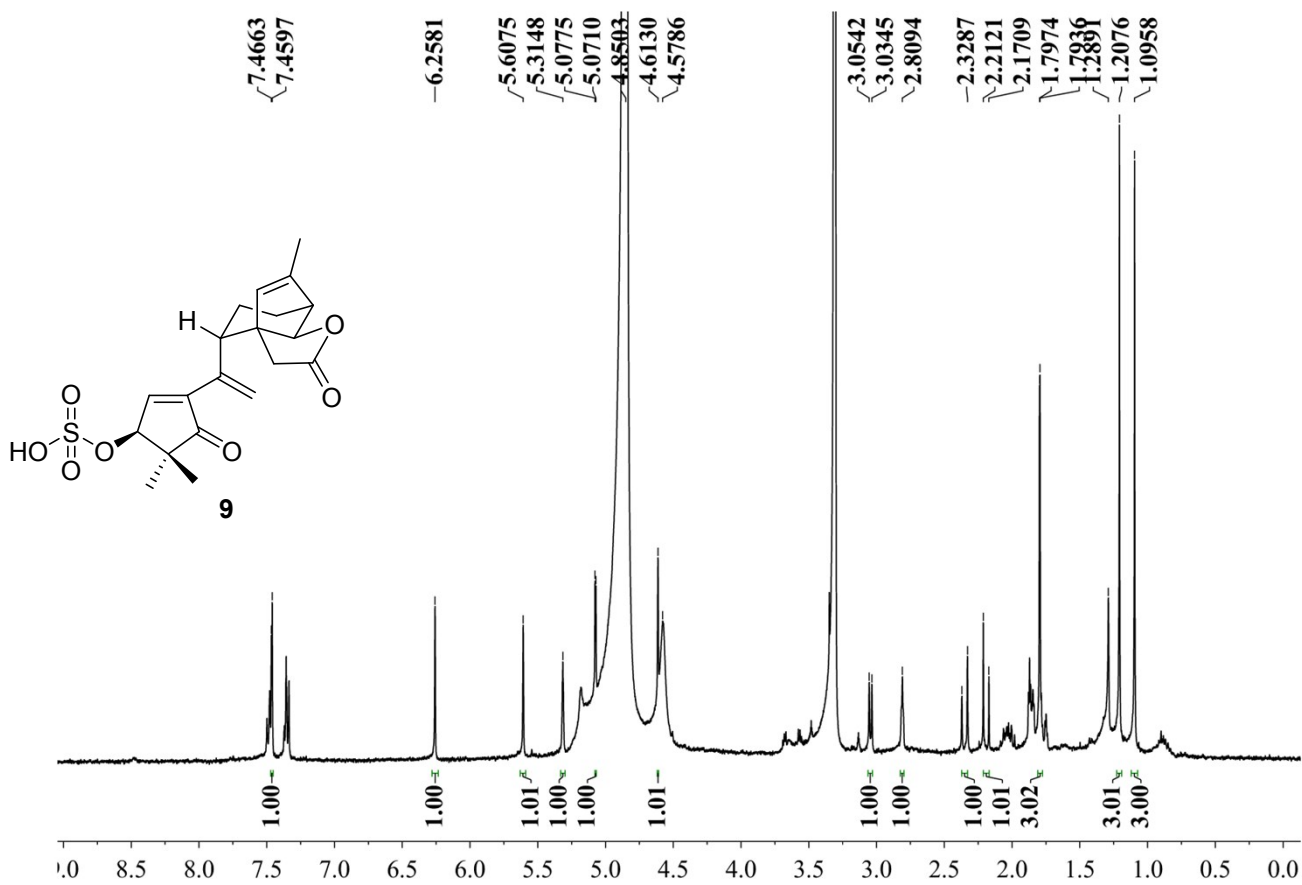

Figure S76. <sup>1</sup>H NMR spectrum of **9** (400 MHz, methanol-*d*<sub>4</sub>)

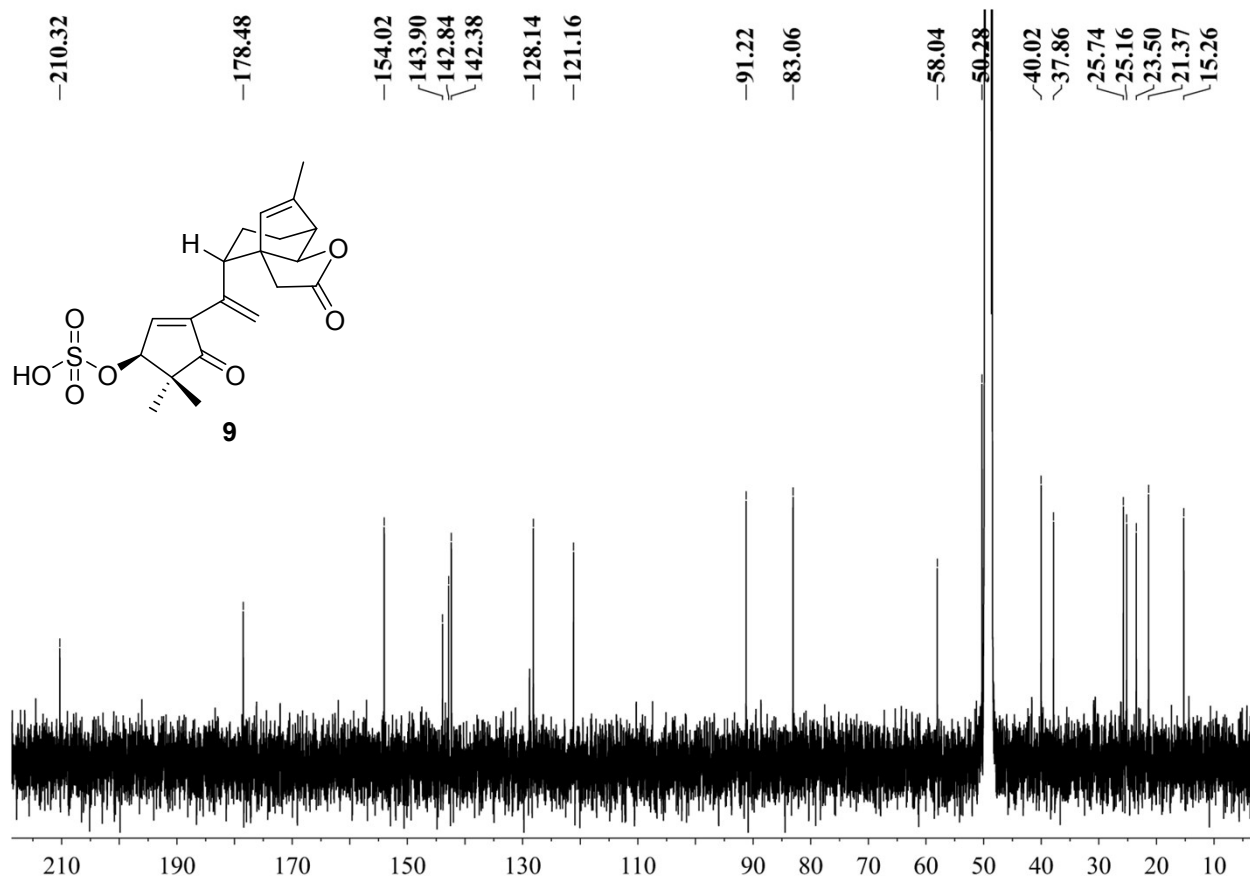

Figure S77. <sup>13</sup>C NMR spectrum of **9** (100 MHz, methanol-*d*<sub>4</sub>)

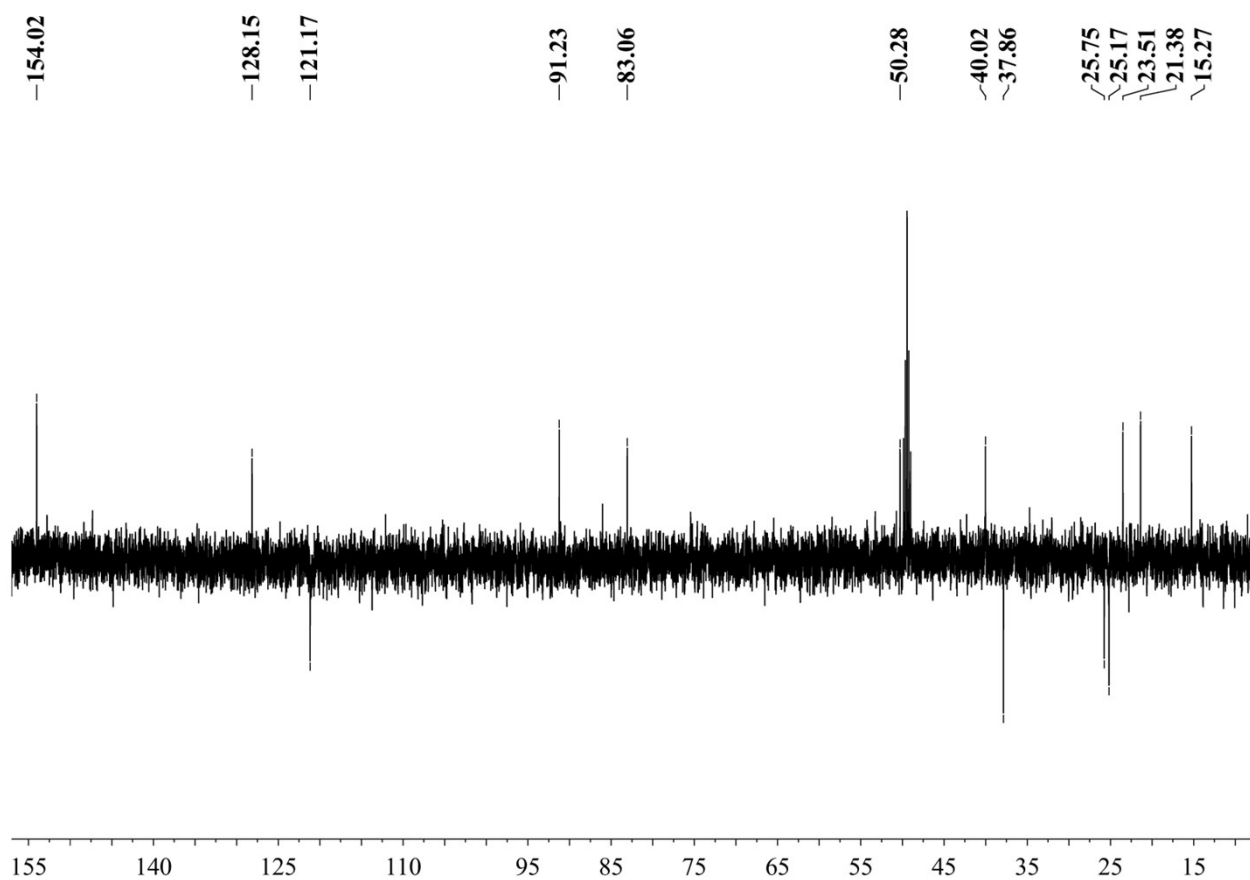

Figure S78. DEPT spectrum of **9** (100 MHz, methanol-*d*<sub>4</sub>)



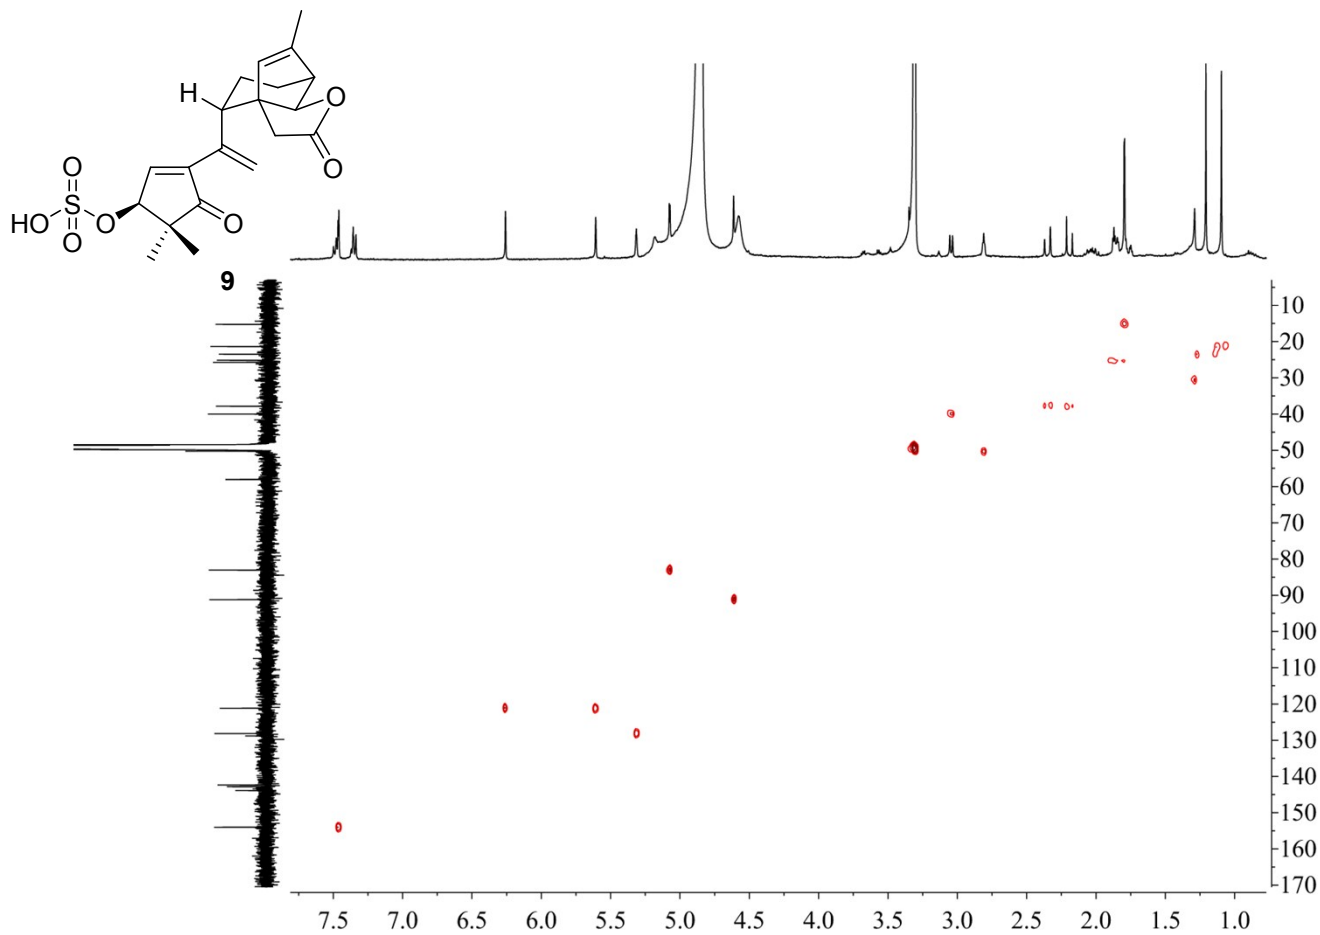

**Figure S79.** HSQC spectrum of **9** ( $^1\text{H}$ : 400 MHz,  $^{13}\text{C}$ : 100 MHz, methanol- $d_4$ )

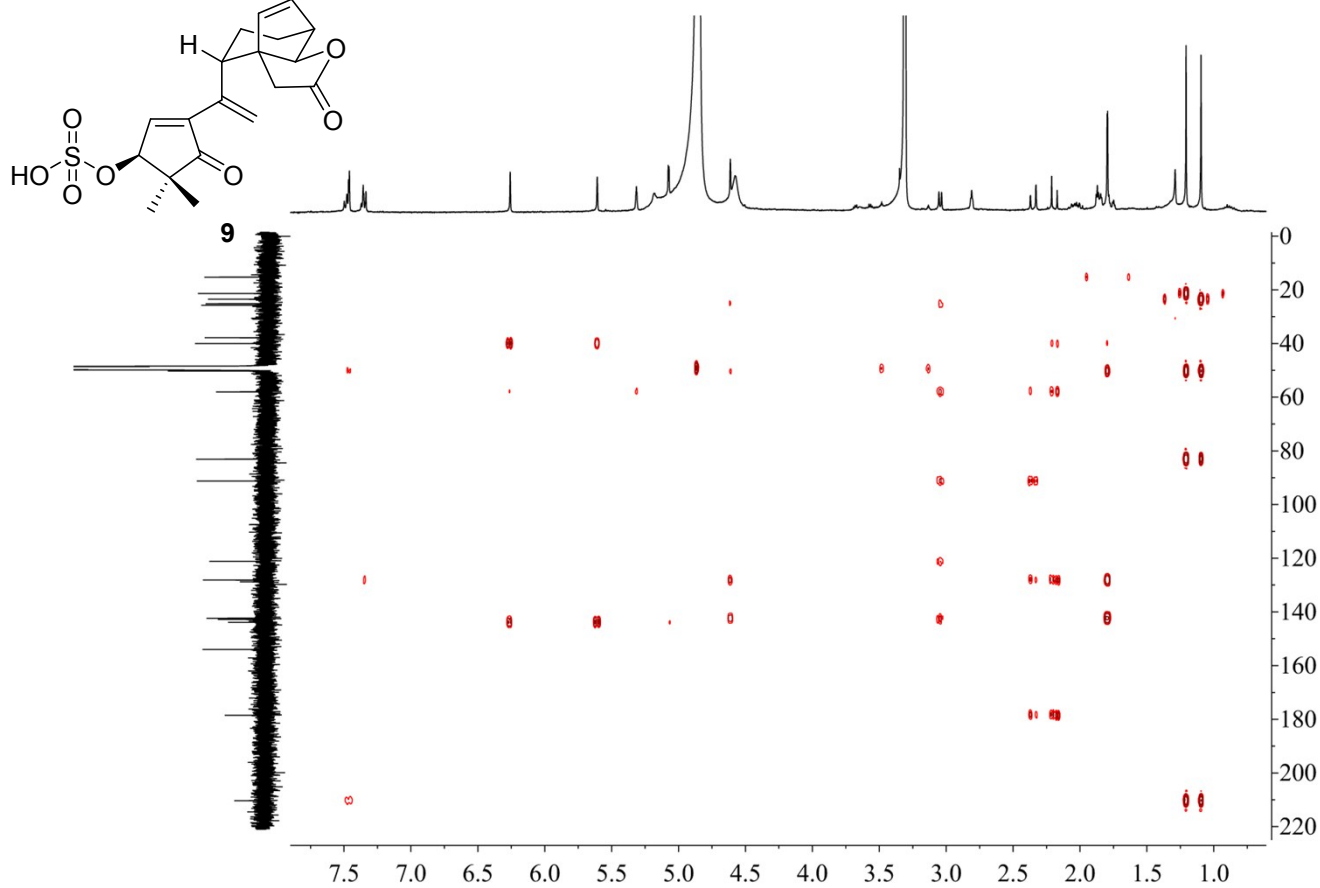

**Figure S81.** HMBC spectrum of **9** ( $^1\text{H}$ : 400 MHz,  $^{13}\text{C}$ : 100 MHz, methanol- $d_4$ )

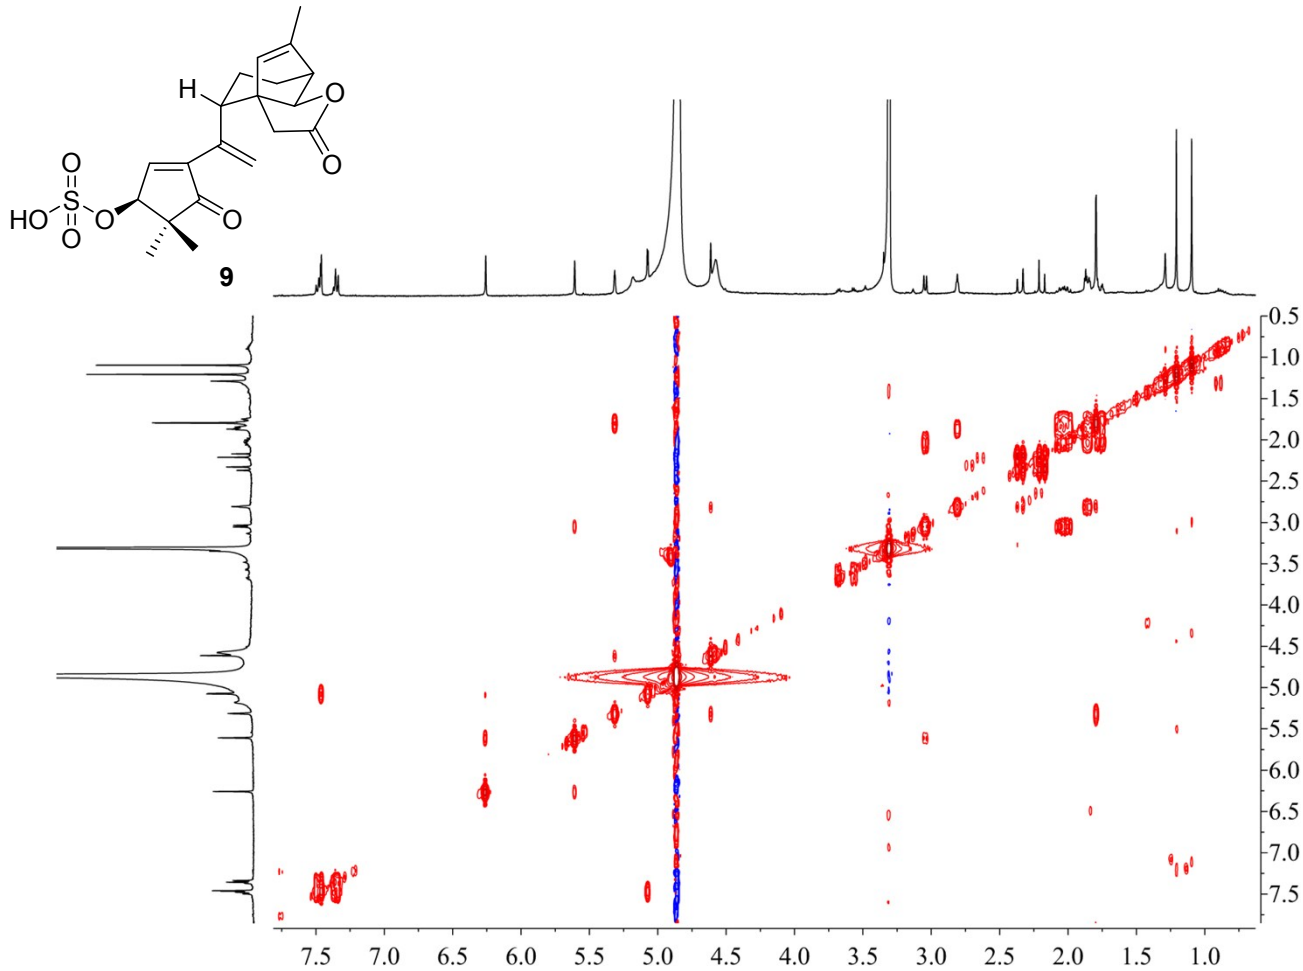

**Figure S81.**  $^1\text{H}$ - $^1\text{H}$  COSY spectrum of **9** (400 MHz, methanol- $d_4$ )

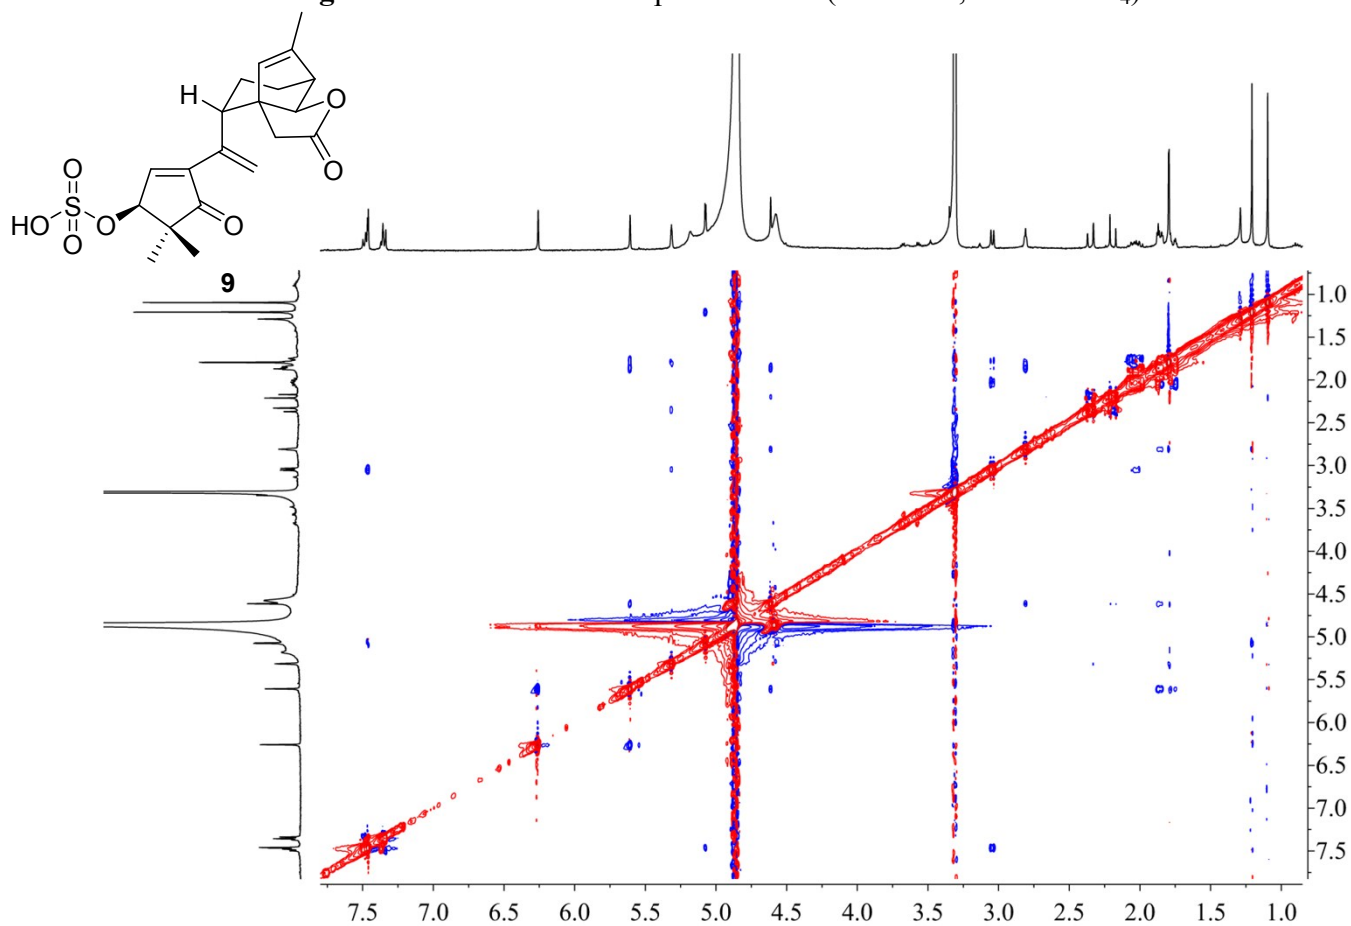

**Figure S82.** NOESY spectrum of **9** (400 MHz, methanol- $d_4$ )
